# Supplementary material for: Jilin zircon – a new natural reference material for microbeam U–Pb geochronology and Hf–O isotopic analysis
Source: Royal Society of Chemistry journal article supplement (doi:10.1039/d1ja00258a), 2021-01-01
Supplement: d1ja00258a1.xlsx [file d1ja00258a1.xlsx]

## Sheet: Table S1
Table S1. Summary of U-Pb, Hf and O isotopic compositions of commonly used zircon reference materials.
Ref. material Name	U-Pb isotopic compositions			U, Th, Hf elemental compositions					Hf isotopic compositions			O isotopic compositions		Quantity	Ref.
	Age (Ma) (2s)	Methoda		U (ppm) (2s)	Th (ppm) (2s)	Hf (ppm) (2s)	Methoda		176Hf/177Hf (2s)	Methoda		δ18O(‰) (2s)	Methoda
OG-1	3465.4 ± 0.6	ID-TIMS		236±184	-	-	ID-TIMS		0.280633±0.000034	Solution MC-ICP-MS		5.70±0.11	SHRIMP	Available from rock outcrop	1-3
KV01	3230 ± 26	ID-TIMS		83±74	41±23	10350±648	LA-ICP-MS		0.280810±0.000013	Solution MC-ICP-MS		6.17±0.33	SIMS	Available from rock outcrop	4
QGNG	1851.6±0.6	ID-TIMS		304±502	232±123	-	ID-TIMS		0.281612±0.000004	Solution MC-ICP-MS		7.18±0.04	Laser fluorination	Available from rock outcrop	3, 5, 6
FC-1/AS3	1099.0±0.6/1099.1±0.5	ID-TIMS		428±698	270±206	-	ID-TIMS		0.282184±0.000016	Solution MC-ICP-MS		5.34±0.07	Laser fluorination	Available from rock outcrop	6-8
91500	1065.4±0.3	ID-TIMS		81±9	28±7	6067±499	LA-ICP-MS		0.282306±0.000008	Solution MC-ICP-MS		9.86 ±0.22	Laser fluorination	One single crystal	9-11
Mud Tank (MT)	732 ± 5	ID-TIMS		15±11	5.4±2.5	-	LA-ICP-MS		0.282507±0.000006	Solution MC-ICP-MS		5.03±0.20	Laser fluorination	Available from rock outcrop	6, 12, 13
GJ-1	608.5±0.4	ID-TIMS		287±151	8.4±2.6	-	ID-TIMS		0.282000±0.000005	Solution MC-ICP-MS		-		crystal	14, 15
LKZ-1	570.0±2.5	ID-TIMS		619±21	90.2±4.2	-	SHRIMP		0.281794±0.000032	LA-MC-ICP-MS		10.72±0.02	Laser fluorination	One single crystal	16
SL13	572.1±0.4	ID-TIMS		210±10	-	-	LA-ICP-MS		-			11.30±0.39	SHRIMP	One single crystal	3, 17
439	564±4	ID-TIMS		-	-	-			-			-		Available from rock outcrop	18
CZ3	563.9±1.3	SHRIMP		550±10	30±2	-	SHRIMP		0.281732±0.000007	Solution MC-ICP-MS		-		One single crystal	19, 20
Sri Lanka F (SLF)	563.2 ± 4.8	ID-TIMS		518	68	-	ID-TIMS		-			-		One single crystal	21
M257	561.3±0.3	ID-TIMS		853±24	229±8	10610±465	LA-ICP-MS		0.281544±0.000018	LA-MC-ICP-MS		13.93±0.22	Laser fluorination	One single crystal	22, 23
BB	561±2	TIMS		270±3.5	63±1.5	6008±112	LA-ICP-MS		0.281674±0.000018	LA-MC-ICP-MS		13.5±0.56	SIMS	crystal	24
Z6266/BR266	559.0±0.2	ID-TIMS		909±27	201 ± 7	-	SHRIMP		0.281630±0.000010			-		One single crystal	6, 25
GZ8	543.92±0.06	ID-TIMS		1305±57	240±6	11600±240	LA-ICP-MS		0.281662±0.000005	Solution MC-ICP-MS		8.88±0.10	Laser fluorination	One single crystal	26
SA01	535.08±0.32	ID-TIMS		161±50	243±126	9797±563	LA-ICP-MS		0.282293±0.000007	Solution MC-ICP-MS		6.16±0.26	Laser fluorination	One single crystal	27
SA02	533.7±3.7	ID-TIMS		580±23	2252±104	8734±379	LA-ICP-MS		0.282287±0.000016	Solution MC-ICP-MS		6.03±0.28	Laser fluorination	One single crystal	28
GZ7	530.26±0.05	ID-TIMS		680±31	611±33	10060±290	LA-ICP-MS		0.281666±0.000004	Solution MC-ICP-MS		6.88±0.05	Laser fluorination	One single crystal	26
M127	524.36±0.16	ID-TIMS		896±36	413±17	12400±500	LA-ICP-MS		0.282396±0.000004	Solution MC-ICP-MS		8.26±0.06	Laser fluorination	One single crystal	29
R33	418.9±0.4	ID-TIMS		175±181	349±180	-	ID-TIMS		0.282764±0.000014	Solution MC-ICP-MS		5.55±0.08	Laser fluorination	Available from rock outcrop	30, 31
Temora 1 (TEM1)	416.75±0.24	ID-TIMS		161±152	75±42	-	ID-TIMS		0.282684±0.000016	LA-MC-ICP-MS		7.93±0.08	SIMS	Available from rock outcrop	32, 33
Temora 2 (TEM2)	416.78±0.33	ID-TIMS		176±140	73±29	-	ID-TIMS		0.282683±0.000016	LA-MC-ICP-MS		8.20±0.02	SIMS	Available from rock outcrop	30, 33
Plešovice	337.13±0.37	ID-TIMS		1485±1460	195±117	11464±297	LA-ICP-MS		0.282482±0.000012	Solution MC-ICP-MS		8.19±0.08	Laser fluorination	Available from rock outcrop	3, 34
Qinghu	159.38±0.12	ID-TIMS		1198±327	530±151	11750±802	LA-ICP-MS		0.283002±0.000004	Solution MC-ICP-MS		5.39±0.22	Laser fluorination	Available from rock outcrop	35, 36
GHR1	48.106±0.023	ID-TIMS		720±984	159±383	-	LA-ICP-MS		0.283050±0.000017	Solution MC-ICP-MS		-		Available from rock outcrop	37
Aus Z2&Aus Z5	38.8963±0.0044/ 38.9022±0.0035	ID-TIMS		244±3/ 314±4	102±2.2/ 247±3	5190±170/ 5418±165	LA-ICP-MS		-			-		One single crystal	38
Fish Canyon Tuff (FCT)	28.478 ± 0.024	ID-TIMS		498±275	298±242	-	ID-TIMS		-			-		Available from rock outcrop	39
Penglai	4.4 ± 0.1	ID-TIMS		37±16	24±14	-	ID-TIMS		0.282906±0.000010	Solution MC-ICP-MS		5.31±0.10	Laser fluorination	Available from rock outcrop	40
a ID-TIMS: isotope dilution-thermal ionization mass spectrometry, LA-ICP-MS: laser ablation-inductively coupled plasmamass spectrometry, solution MC-ICP-MS: solution multi collector inductively coupled plasmamass spectrometry, SHRIMP: sensitive high resolution ion microprobe, SIMS: secondary ion mass spectrometry.
"-" represents no value
Reference:
1. R. A. Stern, S. Bodorkos, S. L. Kamo, A. H. Hickman and F. Corfu, Geostand. Geoanal. Res., 2009, 33, 145-168.
2. A. I. Kemp, J. D. Vervoort, K. E. Bjorkman and L. M. Iaccheri, Geostand. Geoanal. Res., 2017, 41, 659-673.
3. J. N. Ávila, T. R. Ireland, P. Holden, P. Lanc, A. Latimore, N. Schram, J. Foster, I. S. Williams, L. Loiselle and B. Fu, Geostand. Geoanal. Res., 2020, 44, 85-102.85-102.
4. Q. D. Wei, H. Wang, Y. H. Yang, J. H. Yang, C. Huang, S. T. Wu and L. W. Xie, Sci. China. Earth. Sci., 2020, 63, 1780-1790.
5. L. P. Black, S. L. Kamo, I. S. Williams, R. Mundil, D. W. Davis, R. J. Korsch and C. Foudoulis, Chem. Geol., 2003, 200, 171-188.
6. J. D. Woodhead and J. M. Hergt, Geostand. Geoanal. Res., 2005, 29, 183-195.
7. J. B. Paces and J. D. Miller Jr, J. Geophys. Res. Sol. Ea., 1993, 98, 13997-14013.
8. D. Trail, S. J. Mojzsis, T. M. Harrison, A. K. Schmitt, E. B. Watson and E. D. Young, Geochem. Geophys. Geosyst., 2007, 8. Q06014, doi:10.1029/2006GC001449.
9. M. Wiedenbeck, P. AllÉ, F. Corfu, W. L. Griffin, M. Meier, F. Oberli, A. V. Quadt, J. C. Roddick and W. Spiegel, Geostand. Newsl., 1995, 19, 1-23.
10.M. Wiedenbeck, J. M. Hanchar, W. H. Peck, P. Sylvester, J. Valley, M. Whitehouse, A. Kronz, Y. Morishita, L. Nasdala, J. Fiebig, I. Franchi, J. P. Girard, R. C. Greenwood, R. Hinton, N. Kita, P. R. D. Mason, M. Norman, M. Ogasawara, P. M. Piccoli, D. Rhede, H. Satoh, B. Schulz-Dobrick, Ø. Skår, M. J. Spicuzza, K. Terada, A. Tindle, S. Togashi, T. Vennemann, Q. Xie and Y. F. Zheng, Geostand. Ge…
11. J. Woodhead, J. Hergt, M. Shelley, S. Eggins and R. Kemp, Chem. Geol., 2004, 209, 121-135.
12. J. W. Valley, Rev. Mineral. Geochem., 2003, 53, 343-385.
13. S. E. Gain, Y. Gréau, H. Henry, E. Belousova, I. Dainis, W. L. Griffin and S. Y. O'reilly, Geostand. Geoanal. Res., 2019, 43, 339-354.
14. S. E. Jackson, N. J. Pearson, W. L. Griffin and E. A. Belousova, Chem. Geol., 2004, 211, 47-69.
15. M. Morel, O. Nebel, Y. Nebel-Jacobsen, J. Miller and P. Vroon, Chem. Geol., 2008, 255, 231-235.
16. A. C. s. Cheong, Y. J. Jeong, S. Lee, K. Yi, H. J. Jo, H.-S. Lee, C. Park, N. K. Kim, X. H. Li and S. L. Kamo, Minerals, 2019, 9, 325.
17. J. C. Claoué-Long, W. Compston, J. Roberts and C. M. Fanning, SEPM Special Publication, 1995, 54, 3-21.
18. Z. S. Chang, J. D. Vervoort, W. C. McClelland and C. Knaack, Geochem. Geophys. Geosyst., 2006, 7. Q05009, doi:10.1029/2005GC001100.
19. L. Nasdala, P. W. Reiners, J. I. Garver, A. K. Kennedy, R. A. Stern, E. Balan and R. Wirth, Am. Mineral., 2004, 89, 219-231.
20. F. Y. Wu, Y. H. Yang, L. W. Xie, J. H. Yang and P. Xu, Chem. Geol., 2006, 234, 105-126.
21. G. E. Gehrels, V. A. Valencia and J. Ruiz, Geochem. Geophys. Geosyst., 2008, 9, Q03017, doi:10.1029/2007GC001805.
22. L. Nasdala, W. Hofmeister, N. Norberg, J. M. Martinson, F. Corfu, W. Dörr, S. L. Kamo, A. K. Kennedy, A. Kronz and P. W. Reiners, Geostand. Geoanal. Res., 2008, 32, 247-265.
23. Z. C. Hu, Y. S. Liu, S. Gao, W. G. Liu, W. Zhang, X. R. Tong, L. Lin, K. Q. Zong, M. Li and H. H. Chen, J. Anal. At. Spectrom., 2012, 27, 1391-1399.27, 1391-1399.
24. M. M. Santos, C. Lana, R. Scholz, I. Buick, M. D. Schmitz, S. L. Kamo, A. Gerdes, F. Corfu, S. Tapster, P. Lancaster, C. D. Storey, M. A. S. Basei, E. Tohver, A. Alkmim, H. Nalini, K. Krambrock, C. Fantini and M. Wiedenbeck, Geostand. Geoanal. Res., 2017, 41, 335-358.
25. B. Schoene, J. L. Crowley, D. J. Condon, M. D. Schmitz and S. A. Bowring, Geochim. Cosmochim. Acta., 2006, 70, 426-445.
26. L. Nasdala, F. Corfu, B. Schoene, S. R. Tapster, C. J. Wall, M. D. Schmitz, M. Ovtcharova, U. Schaltegger, A. K. Kennedy and A. Kronz, Geostand. Geoanal. Res., 2018, 42, 431-457.research, 2018, 42, 431-457.
27.C. Huang, H. Wang, J. H. Yang, J. Ramezani, C. Yang, S. B. Zhang, Y. H. Yang, X. P. Xia, L. J. Feng and J. Lin, Geostand. Geoanal. Res., 2020, 44, 103-123.
28.C. Huang, H. Wang, J. Yang, C. Yang, Z. Li, Y. Yang, L. Feng, L. Xie and S. Wu, J. Anal. At. Spectrom., 2021, 36, 368-374.
29. L. Nasdala, F. Corfu, J. W. Valley, M. J. Spicuzza, F. Y. Wu, Q. L. Li, Y. H. Yang, C. Fisher, C. Münker and A. K. Kennedy, Geostand. Geoanal. Res., 2016, 40, 457-475.
30. L. P. Black, S. L. Kamo, C. M. Allen, D. W. Davis, J. N. Aleinikoff, J. W. Valley, R. Mundil, I. H. Campbell, R. J. Korsch, I. S. Williams and C. Foudoulis, Chem. Geol., 2004, 205, 115-140.
31. C. M. Fisher, J. D. Vervoort and S. A. DuFrane, Geochem. Geophys. Geosyst., 2014, 15, 121-139.
32. L. P. Black, S. L. Kamo, C. M. Allen, J. N. Aleinikoff, D. W. Davis, R. J. Korsch and C. Foudoulis, Chem. Geol., 2003, 200, 155-170.
33. W. Zhang and Z.C. Hu, At. Spectrosc., 2020, 41, 93-102.
34. J. Sláma, J. Košler, D. J. Condon, J. L. Crowley, A. Gerdes, J. M. Hanchar, M. S. Horstwood, G. A. Morris, L. Nasdala and N. Norberg, Chem. Geol., 2008, 249, 1-35.
35.X. H. Li, G. Q. Tang, B. Gong, Y. H. Yang, K. J. Hou, Z. C. Hu, Q. L. Li, Y. Liu and W. X. Li, Chin. Sci. Bull., 2013, 58, 4647-4654.
36. X. H. Li, Y. Liu, Q. L. Li, C. H. Guo and K. R. Chamberlain, Geochem. Geophys. Geosyst., 2009, 10. Q04010, doi:10.1029/2009GC002400.
37. M. P. Eddy, M. Ibañez-Mejia, S. D. Burgess, M. A. Coble, U. G. Cordani, J. DesOrmeau, G. E. Gehrels, X. H. Li, S. MacLennan and M. Pecha, Geostand. Geoanal. Res., 2019, 43, 113-132.
38. A. K. Kennedy, J. F. Wotzlaw, U. Schaltegger, J. L. Crowley and M. Schmitz, The Can. Mineral., 2014, 52, 409-421.
39. M. D. Schmitz and S. A. Bowring, Geochim. Cosmochim. Acta., 2001, 65, 2571-2587.
40. X. H. Li, W. G. Long, Q. L. Li, Y. Liu, Y. F. Zheng, Y. H. Yang, K. R. Chamberlain, D. F. Wan, C. H. Guo, X. C. Wang and H. Tao, Geostand. Geoanal. Res., 2010, 34, 117-134.

## Sheet: Table S2
Table S2. Trace element results of the Jilin zircon.
	Ti	Y	Nb	La	Ce	Pr	Nd	Sm	Eu	Gd	Tb	Dy	Ho	Er	Tm	Yb	Lu	Hf	Ta	Pb	Th	U	Th/U
	ppm	ppm	ppm	ppm	ppm	ppm	ppm	ppm	ppm	ppm	ppm	ppm	ppm	ppm	ppm	ppm	ppm	ppm	ppm	ppm	ppm	ppm
Session 1
JLZir1-01	61.2492	1487.19	0.972183	0.165547	9.21015	0.75651	8.76065	11.3346	1.5056	49.2415	14.4828	148.48	50.9208	211.761	41.7745	374.64	68.96	8566.43	0.675553	42.0699	295.31	281.781	1.04801
JLZir1-02	24.6211	605.702	1.13674	0.0483787	9.82213	0.203619	2.80895	4.35404	0.395552	16.8469	5.24971	57.2143	19.843	87.6939	18.8199	178.342	33.6463	10678.8	0.574636	44.0873	294.984	414.595	0.711498
JLZir1-03	33.825	1022.53	0.860055	0.139501	10.7783	0.855173	9.57268	11.5466	0.901722	36.9045	10.1221	103.142	34.6471	142.144	29.258	262.33	47.0445	9213.09	0.51859	37.0909	254.241	296.167	0.858437
JLZir1-04	44.4237	1078.49	1.09567	0.0884978	9.64924	0.4628	5.90918	7.99452	0.845889	34.9814	10.0477	106.51	37.445	156.453	31.5354	286.419	52.5613	8833.79	0.480985	32.3554	233.035	243.578	0.956713
JLZir1-05	31.0241	847.69	0.798102	0.00953491	7.49033	0.163279	3.07599	6.29165	0.495216	26.0785	7.90373	84.0091	28.6114	120.453	24.6801	223.389	41.3692	9735.53	0.386695	17.212	122.441	157.716	0.776334
JLZir1-06	20.2157	657.914	1.22326	0.0207919	10.985	0.192943	2.93424	4.52634	0.470733	18.6736	5.44531	61.3333	21.5664	95.88	20.8021	194.28	36.226	10983.6	0.589449	56.5999	382.292	544.963	0.7015
JLZir1-07	47.5653	3423.22	3.57879	0.161903	12.8981	0.718492	11.0772	28.4648	3.43434	132.864	36.7189	367.811	119.566	471.795	89.5454	764.973	131.315	8439.31	1.34452	190.404	1358.92	820.085	1.65705
JLZir1-08	28.5174	1368.7	1.2445	0.0999137	13.1642	0.718068	8.65211	11.1105	0.942406	39.4425	11.5204	126.165	46.0292	198.01	41.5108	379.262	70.5562	10585.7	0.896208	75.1739	533.004	653.769	0.815278
JLZir1-09	33.4279	1116.77	0.857765	0.094246	10.5439	0.661915	8.39231	10.6587	1.11907	40.0636	11.0858	116.531	37.9832	157.096	31.6759	286.32	51.673	9535.58	0.439152	41.0052	291.549	313.156	0.931004
JLZir1-10	21.5413	589.576	1.48725	0.0101919	8.83074	0.0737884	1.44333	3.25577	0.300128	15.4554	4.88467	53.6296	19.9264	88.1376	19.1552	182.907	33.7249	11263.4	0.714329	25.7041	177.394	266.451	0.665766
JLZir1-11	40.2664	505.517	0.960139	0.0135257	6.60461	0.166905	2.8605	4.48184	0.408037	16.3449	4.72634	50.8047	17.3916	76.6175	16.1668	151.4	28.7286	9141.86	0.448659	12.2274	80.4738	114.97	0.699958
JLZir1-12	24.9834	926.876	0.95546	0.018086	8.17732	0.150757	2.51657	4.98694	0.467604	27.6199	8.08779	88.4639	31.3275	133.224	27.9884	257.425	45.9634	12234.8	0.425926	37.5905	271.583	364.587	0.744907
JLZir1-13	17.7033	1001.43	0.860537	0.0376665	10.8832	0.139418	2.84437	4.94711	0.474244	25.8677	8.20598	90.0889	32.8397	146.173	30.5715	281.988	51.8368	12531.6	0.474132	60.631	430.025	553.586	0.776799
JLZir1-14	48.4106	1284.47	0.924937	0.104224	9.92564	0.829553	9.83443	10.5536	0.894504	40.3629	11.9396	126.386	44.1112	184.385	37.5551	332.336	61.4076	9069.85	0.641683	34.485	233.71	270.043	0.865454
JLZir1-15	44.733	1343.13	0.852318	0.142263	10.1526	0.798846	8.76824	9.75554	0.991094	38.9712	11.7805	125.282	45.3439	193.123	38.0705	335.773	63.4811	9155.35	0.967672	42.1278	297.702	328.114	0.907313
JLZir1-16	50.2459	1625.02	1.26523	0.126032	10.1091	0.722206	9.6266	11.4287	1.05928	48.7324	14.6686	156.597	55.9912	235.518	46.833	413.553	76.2095	8939.52	0.821324	46.8463	337.705	360.531	0.936687
JLZir1-17	22.4793	963.7	1.7441	0.0471511	13.668	0.236243	3.31315	5.6668	0.445244	24.6492	7.96648	89.4566	31.9595	141.65	30.5336	283.206	53.0861	11955.6	1.06856	105.4	715.59	951.696	0.75191
JLZir1-18	35.362	1835.21	1.67007	0.14123	11.9727	0.708325	10.0391	12.8623	1.26317	59.3184	17.251	181.032	62.8988	262.679	53.3721	469.211	84.4375	9048.31	0.883405	90.4534	633.696	615.341	1.02983
JLZir1-19	38.1063	1186.42	1.18367	0.0856657	11.8358	0.750242	9.28645	10.6535	1.11407	38.6227	11.1261	115.015	39.9733	172.772	34.9932	311.381	57.0239	9898.26	0.809227	54.6496	376.783	427.548	0.881263
JLZir1-20	39.6797	1461.14	0.906354	0.182268	10.895	0.72876	9.81011	10.4818	1.07528	41.5643	12.4361	136.778	49.4608	210.731	42.7287	373.202	70.08	9652.41	0.874776	61.6558	443.344	520.704	0.851431
JLZir1-21	26.9944	720.845	0.967112	0.046818	10.4205	0.165723	2.5283	4.29211	0.616461	19.5744	5.91085	65.0172	23.4646	105.489	22.4409	213.465	40.4545	8674.21	0.5884	60.1234	412.362	525.715	0.784383
JLZir1-22	36.0992	1460.27	1.00874	0.116115	10.8717	0.72064	9.33063	11.8251	0.88706	43.3846	12.6962	141.09	49.4392	211.182	42.4901	374.789	68.9998	9935.96	0.7371	65.5342	449.829	513.386	0.876201
JLZir1-24	13.4966	722.507	1.56757	0.00811238	12.934	0.0900756	1.79396	3.84141	0.281567	16.2388	5.59487	63.9031	24.3086	108.997	23.7943	230.12	43.6485	12986	1.03534	56.367	388.602	630.823	0.616024
JLZir1-25	34.2997	483.384	1.04035	0.0218124	7.60982	0.114674	2.15242	2.82728	0.313576	13.5807	4.2621	45.3763	16.1284	71.0051	15.3332	144.697	26.6205	10043.3	0.478463	22.8863	153.833	226.453	0.679318
JLZir1-26	47.8561	1080.67	0.868159	0.165495	10.47	0.728905	10.0668	12.0639	1.13612	40.5556	11.5822	112.823	38.1778	156.108	32.0319	283.73	51.1311	9006.99	0.411363	26.9501	194.492	209.416	0.928732
JLZir1-27	36.9252	666.37	0.67585	0.149516	11.0645	0.421024	4.70875	6.48851	0.608561	22.6781	6.16666	66.1234	23.0887	98.3755	20.1813	188.338	34.9515	9237.72	0.306325	18.1828	126.801	146.423	0.865987
JLZir1-28	24.0241	1364.39	1.35298	0.0795588	12.9715	0.532965	7.43763	10.5049	0.881077	41.7035	12.9555	136.149	46.3709	196.684	40.6625	366.402	66.8517	11307.3	0.832646	110.719	791.6	908.285	0.871532
JLZir1-29	33.0505	1042.67	0.755804	0.0787632	10.2979	0.635471	8.20326	9.993	0.85374	34.0521	9.81405	102.936	35.9119	151.687	30.4351	280.274	51.4157	10120.6	0.605109	45.9874	311.232	393.574	0.790783
JLZir1-30	27.4586	584.245	1.33455	0.0117676	8.3127	0.10818	2.47747	4.12026	0.286234	17.5859	5.19099	56.3312	19.8869	86.6212	18.4674	176.782	32.3152	11197.9	0.685773	30.7131	213.918	309.56	0.691041
JLZir1-31	24.4951	963.213	0.88799	0.0298369	10.7175	0.383348	6.45574	8.48433	0.721739	32.8347	8.85132	94.3372	32.6319	137.483	28.1307	255.982	46.7945	10377.4	0.515482	53.1935	368.428	448.026	0.822338
JLZir1-32	11.2095	1549.37	1.12282	0	15.2439	0.583896	8.27104	11.6532	1.01461	43.657	13.2576	145.44	51.4754	225.732	47.5358	425.845	78.6881	12701.8	0.754805	168.103	1134.07	1298.96	0.873062
JLZir1-33	29.3663	598.523	1.04959	0.0274758	9.19652	0.177763	3.09343	4.36636	0.528545	16.1505	5.11833	54.7509	20.1065	87.809	19.3839	181.646	34.6191	10166.2	0.554668	35.6981	241.553	322.956	0.747944
JLZir1-34	22.3955	784.007	0.698273	0.00361113	7.01538	0.170638	3.12228	5.68349	0.856339	24.5176	7.31027	76.2018	26.0388	112.122	22.9975	209.253	38.8243	9897.19	0.281596	28.4038	192.066	226.944	0.846313
JLZir1-35	23.0658	827.155	0.795697	0	8.46974	0.11961	2.42167	5.64295	0.423084	23.0228	7.28011	78.3797	28.308	121.459	25.6669	234.719	43.6717	11036.6	0.464841	28.7645	199.561	282.749	0.705787
JLZir1-36	30.471	1500.65	1.35652	0.123059	12.5677	0.750931	10.0463	12.194	1.19119	50.4826	14.9543	151.008	50.7783	212.812	42.7217	379.706	68.1331	10006.1	0.677528	90.414	635.259	663.004	0.958153
JLZir1-37	26.0192	1215.55	0.927228	0.183531	12.6603	0.874718	9.7374	11.7784	0.955489	38.4778	11.4095	118.005	41.0592	175.247	35.8754	324.748	59.8741	9801.61	0.913077	51.5006	354.165	439.008	0.806741
JLZir1-38	32.8486	832.86	0.591147	0.0553628	8.16856	0.515264	6.81707	9.29682	0.887219	30.7257	8.3486	88.0973	28.993	119.75	24.8079	218.509	39.8604	9553.15	0.291435	22.3193	154.032	174.215	0.884149
JLZir1-39	34.8805	1216.96	0.985681	0.163973	10.5307	0.788521	9.94474	12.2847	0.707298	39.4096	11.7153	121.04	42.4056	179.736	36.2143	323.849	59.6498	9600	0.610297	37.7947	263.148	329.651	0.798262
JLZir1-40	19.3196	594.687	1.50899	0.0151353	9.45471	0.104203	1.72334	4.15281	0.265744	15.7705	4.91074	55.7744	19.8369	86.5913	18.8807	180.691	33.8608	11054.4	0.82913	30.5286	209.874	322.502	0.650768
JLZir1-41	26.7019	1217.85	0.987315	0.116702	10.8952	0.718238	7.95469	10.6742	0.853263	41.3076	11.5572	121.083	41.4929	176.298	36.4634	327.72	60.7853	9444.46	0.540708	39.9301	285.578	345.803	0.82584
JLZir1-42	33.2488	1130.44	0.956181	0.0852135	11.8089	0.843027	9.80608	12.0185	0.863386	39.3915	11.0256	113.035	38.6178	160.546	32.5094	288.186	51.9079	9640.95	0.545682	36.4668	255.266	309.167	0.825659
JLZir1-43	32.3887	1668.32	1.32824	0.125836	11.6394	0.765574	9.38132	11.5078	0.895693	46.4811	14.2349	153.983	55.5813	239.701	48.5466	430.05	78.3373	9710.41	0.955894	77.7673	559.635	610.012	0.917417
JLZir1-44	23.7314	819.25	0.577536	0.0309679	6.89534	0.271374	4.18457	6.63779	1.13288	27.3317	7.515	79.8371	27.7381	116.366	24.1663	221.278	40.8869	10042.9	0.308398	47.9181	341.01	379.85	0.89775
JLZir1-45	32.0852	867.982	1.45888	0.0447782	9.00164	0.413358	5.71843	7.31935	1.17602	29.7315	8.39042	86.152	29.6047	123.204	24.8372	226.868	41.9127	9357.77	0.457131	29.3037	192.192	201.816	0.952314
JLZir1-46	25.1702	322.682	0.614899	0	5.03721	0.0418009	0.841724	1.75071	0.156855	7.16361	2.68058	28.5083	10.4204	47.1246	10.2937	99.1445	18.8378	10091.8	0.310349	11.7129	72.9026	134.341	0.54267
JLZir1-47	20.4515	999.254	0.843137	0.0424969	9.05119	0.258866	5.10233	8.36626	0.892897	31.9825	9.4586	99.2359	33.8625	144.194	29.0741	269.387	47.9616	11090.5	0.431236	45.1199	317.679	388.112	0.818525
JLZir1-48	40.3356	1062.78	0.685865	0.107577	9.50304	0.819841	9.19666	9.68588	1.04836	36.7176	10.1065	107.914	37.1276	155.383	31.4056	281.429	51.9952	9030.49	0.325562	25.6815	194.761	212.298	0.917394
JLZir1-49	49.3831	1362.11	1.12856	0.135241	9.91576	0.685657	9.26709	10.0979	1.07151	42.4526	12.808	131.852	46.4745	193.319	38.971	344.704	63.0461	8392.67	0.738512	31.4043	224.581	253.553	0.885735
JLZir1-50	31.6802	987.76	0.783535	0.113559	10.515	0.630661	8.84113	9.45197	0.857178	32.7354	9.42574	100.986	33.905	141.733	28.9928	263.19	48.2202	9425.29	0.651588	32.1791	220.972	269.058	0.821278
JLZir1-51	22.818	511.034	1.32628	0.0152474	9.4406	0.0947787	1.59266	3.14798	0.233559	11.6495	4.17995	45.21	16.7886	76.518	16.6033	158.156	29.5864	10873.4	0.590465	28.0525	186.97	306.224	0.610566
JLZir1-52	31.8339	1814.99	1.45521	0.131806	11.096	0.781042	8.61867	11.1185	1.07036	48.2902	15.3508	167.591	60.2439	258.616	51.7325	470.508	86.7068	9404.89	0.966798	98.3785	692.265	715.002	0.9682
JLZir1-53	56.182	1411.18	0.728838	0.168159	9.62778	0.720425	9.38829	10.3975	0.977984	42.0513	12.3701	133.199	47.8153	201.779	39.2427	347.989	63.381	8429.46	0.787663	44.3756	316.345	342.873	0.92263
JLZir1-54	25.3511	1128.89	0.710021	0.0699206	11.1227	0.715633	9.53906	11.6855	0.897624	37.5091	10.8815	112.782	37.6477	159.873	32.2236	293.002	53.3906	10405.2	0.733655	63.4935	433.873	548.01	0.791724
JLZir1-55	42.7727	985.143	0.856876	0.05184	8.82215	0.500761	5.82085	8.52499	1.00066	35.1613	9.69439	98.2194	33.2276	140.915	28.6726	257.781	48.1703	8524.89	0.444737	26.9064	207.367	220.305	0.941271
JLZir1-56	11.802	848.735	0.869555	0.00428984	9.61195	0.0476925	1.13694	2.82392	0.330728	17.9335	6.17568	72.2173	27.3055	124.053	26.6055	248.961	46.72	12394	0.485841	58.6485	402.595	585.836	0.687215
JLZir1-57	43.9601	1374.13	2.25914	0.128549	10.7676	0.679198	9.2153	11.5965	1.24824	44.6905	12.7686	134.724	45.1061	194.45	38.491	362.823	59.7365	7366.89	0.613269	69.8714	327.429	327.976	0.998333
JLZir1-58	26.4461	1073.89	1.88729	0.0217813	11.0074	0.309045	5.36657	8.37909	0.774438	34.6434	9.79933	104.482	34.631	153.119	30.1169	292.63	47.271	9339.25	0.551108	81.493	371.556	449.031	0.827461
JLZir1-59	12.2776	815.449	3.14272	0.00848506	19.1096	0.112736	2.21061	3.87314	0.397904	18.0005	5.92752	70.1188	25.5901	122.015	26.5551	271.645	44.9555	11569.4	1.29109	217.287	947.365	1448.84	0.653876
JLZir1-60	9.59705	786.422	2.5394	0.00465349	14.1282	0.140509	2.20857	4.11708	0.356835	17.9696	5.77778	67.1513	24.4704	117.186	25.4428	259.562	43.7336	11501.1	1.34998	150.641	661.396	1047.68	0.631297
JLZir1-61	12.2459	844.347	2.48844	0.0430427	15.2303	0.204375	2.85293	4.31694	0.497318	20.3316	6.27786	74.4119	26.1952	125.36	26.5403	265.749	46.0301	11275.3	1.18972	170.323	775.119	1086.44	0.713451
JLZir1-62	20.0389	545.751	2.1149	0.0033739	11.424	0.0712757	1.4129	2.49412	0.279189	13.0784	4.10416	47.1401	17.0182	80.3712	17.3861	174.621	30.4714	11672.1	0.839872	89.2623	390.763	657.709	0.594128
JLZir1-63	21.2674	583.054	1.9079	0.00226891	11.0304	0.125922	2.15388	3.21025	0.338597	14.3335	4.54752	52.0084	18.4178	85.5319	18.2696	185.809	31.4317	10656.3	0.800398	88.5231	392.87	625.736	0.627853
JLZir1-64	27.0782	573.482	1.98101	0.0021701	10.9308	0.114959	1.84123	3.48907	0.348145	13.6919	4.65537	50.9856	18.2575	84.0107	17.6165	183.64	30.3837	10392.4	0.851174	82.6852	367.545	588.467	0.624581
JLZir1-65	17.7009	477.193	1.89081	0.00433002	10.393	0.0676717	1.21901	2.22907	0.20985	10.5412	3.51112	41.6092	15.1054	71.884	15.2283	155.032	26.7607	11356.3	0.829235	77.3033	335.005	573.537	0.584104
JLZir1-66	43.0008	846.285	1.22198	0.0823574	9.01282	0.56253	7.71673	8.72581	0.782642	30.2265	8.37856	88.208	28.835	122.658	25.1225	241.696	39.2349	8194.92	0.381848	28.0697	129.237	158.305	0.81638
JLZir1-67	48.0854	741.654	1.56556	0.042358	8.41819	0.369165	5.27694	6.10831	0.606328	23.2319	6.82254	73.7199	24.746	109.481	22.8091	223.277	36.752	7883.89	0.58674	28.7377	130.049	168.632	0.7712
JLZir1-68	55.7984	1367.54	1.53869	0.151308	9.7765	0.801909	9.86066	11.0983	1.0901	41.6188	12.0932	132.274	45.517	196.942	38.4228	356.506	60.5448	7883.86	0.71029	51.758	249.16	285.459	0.872841
JLZir1-69	52.7121	1443.05	1.62216	0.140001	10.7088	0.765016	10.3168	12.1222	1.10253	48.57	13.6976	145.092	49.1932	213.613	41.2273	392.366	65.0251	8125.88	0.741069	58.2621	277.684	304.54	0.911816
JLZir1-70	35.9957	1213.12	1.52858	0.0959247	10.4741	0.663425	9.23894	10.639	1.05281	39.7044	11.3562	119.769	41.1	179.978	35.4746	336.06	55.8679	8298.68	0.510281	56.3248	263.788	297.82	0.885728
JLZir1-71	41.5555	1447.39	1.62404	0.15067	11.4626	0.757801	9.66848	11.7389	1.2484	46.8848	13.3723	141.976	48.5278	211.417	41.8209	399.567	67.3268	8029.71	0.640466	73.4859	344.591	370.677	0.929628
JLZir1-72	35.7391	1151.88	1.31756	0.0683706	10.826	0.643247	8.73835	10.9959	1.06056	38.9521	10.9715	114.268	38.4022	167.118	33.1731	319.437	52.8038	8343.75	0.435826	52.7291	252.385	291.08	0.867065
JLZir1-73	38.3832	990.639	1.32117	0.0933878	10.0109	0.578911	8.28825	10.202	0.865955	35.8083	9.75974	104.356	33.4923	146.335	28.9993	275.407	45.0259	8387.12	0.471624	29.706	140.974	174.231	0.809121
JLZir1-74	47.3272	1642.72	1.94872	0.169466	10.9099	0.773519	10.0888	11.9455	1.25001	51.7684	14.8005	162.618	55.9132	240.718	47.6241	449.187	76.0137	7921.22	0.938075	75.8055	365.599	369.922	0.988314
JLZir1-75	37.3933	968.013	1.44719	0.0397629	9.8945	0.501995	7.46438	9.8113	0.903079	35.1691	9.69417	100.043	33.5353	140.959	28.8554	282.423	45.4325	8431.83	0.465671	34.5769	161.767	184.088	0.878751
JLZir1-76	49.3335	1319.63	1.85071	0.159753	10.8705	0.829447	10.0546	11.3284	1.25968	45.3438	12.788	136.699	45.1072	194.515	38.4336	365.562	61.2722	7918.71	0.707621	56.8276	259.579	278.988	0.93043
JLZir1-77	36.5097	1424.27	1.68796	0.137621	12.1719	0.807579	10.1627	13.065	1.34834	49.3531	13.9182	146.231	48.0724	206.877	40.6397	390.207	63.429	8533.55	0.649324	67.2086	317.63	332.709	0.954679
JLZir1-78	35.4186	1525.66	1.75525	0.150535	13.2416	0.959453	11.3459	12.3029	0.702992	44.2971	12.7378	142.413	50.1906	220.6	43.9054	413.63	69.4492	8251.45	1.12652	68.7226	311.216	421.514	0.738329
JLZir1-79	34.3753	1476.14	1.68451	0.146228	13.6606	0.95161	11.0535	12.5918	0.835275	43.0914	12.5325	138.257	47.9925	213.35	42.149	402.365	66.9572	8364.11	1.01491	63.3799	291.701	400.223	0.728845
JLZir1-80	38.8604	2463.34	3.08542	0.203864	12.3939	0.767256	9.26269	12.4613	1.48453	69.3227	20.6921	232.151	80.8402	356.696	69.3687	658.266	108.524	7920.31	1.54397	134.869	638.738	609.598	1.0478
JLZir1-81	34.5023	1673.7	2.00017	0.189009	12.8096	0.875357	10.0511	10.8449	1.01938	45.2662	13.605	154.626	55.0741	244.569	49.3899	472.073	78.8929	8431.19	1.19846	93.1708	417.341	495.015	0.843087
JLZir1-82	14.0728	758.164	2.3794	0.00708817	14.1513	0.132742	2.22016	3.9242	0.268234	17.4748	5.65553	66.7898	24.3925	115.618	24.9831	260.991	45.3778	10834.4	1.15538	88.7842	397.788	736.826	0.539867
JLZir1-83	19.2292	667.557	2.10506	0.00998741	12.8309	0.135549	2.01111	3.61298	0.295685	16.1934	5.19464	60.4643	21.4911	102.224	22.295	224.581	38.1175	10532.4	0.844005	68.1004	303.387	518.067	0.585614
JLZir1-84	23.2758	615.429	1.85405	0.00717261	10.3528	0.141495	2.49389	3.74558	0.30873	15.9545	4.84513	56.7248	19.9491	92.419	19.6352	197.733	33.2663	9847.34	0.720639	46.4225	207.457	340.966	0.608438
JLZir1-85	47.2314	1250.94	1.47366	0.12413	11.3971	0.780624	10.447	12.4724	0.972879	40.669	11.3873	123.545	41.6912	181.22	35.4323	337.232	56.3339	8075.59	0.703583	41.4754	189.045	232.281	0.813863
JLZir1-86	28.4568	1429.22	1.6635	0.121327	13.1066	0.842219	11.3993	12.2678	0.711129	41.9855	12.0029	131.656	46.7274	206.392	41.3759	388.506	64.5102	8194.93	0.937083	61.0694	280.674	381.501	0.73571
JLZir1-87	46.7311	1048.66	1.28387	0.115124	9.50412	0.619929	8.31757	9.99321	1.00545	32.7385	9.26518	103.008	34.2018	152.438	30.8731	297.192	48.1543	8082.84	0.592823	41.7374	191.455	237.881	0.804837
JLZir1-88	40.5666	2716.22	3.34327	0.134085	12.968	0.807746	10.4205	19.3164	1.84596	88.9977	25.5986	271.507	91.1861	388.41	75.4526	708.369	112.372	7933.94	1.2552	206.155	947.962	817.282	1.1599
JLZir1-89	31.4109	1523.99	1.57824	0.114965	12.8	0.779802	10.2268	11.181	1.00295	42.2203	12.6836	143.633	49.6836	220.522	44.2853	424.377	69.3282	8903.69	0.974763	154.94	689.2	817.389	0.843173
JLZir1-90	30.5667	1874.17	2.24681	0.150215	13.395	0.807908	10.4729	11.4932	1.08281	50.047	15.1724	173.974	60.5208	268.404	53.9521	504.871	83.8836	8717.61	1.16029	204.081	936.881	1013.93	0.924011
Session 2
JLZir1-01	29.6627	1366.41	1.51731	0.107353	13.3558	0.784223	10.2286	11.2019	0.935623	40.0794	11.7336	126.43	44.4743	199.106	39.2106	377.761	63.6529	9061.18	0.845655	140.793	639.658	789.474	0.810234
JLZir1-02	23.9239	588.405	1.67782	0.0143776	7.383	0.180083	2.89893	3.93905	0.462147	15.6206	4.90604	53.5047	18.9966	88.3293	18.98	190.409	32.9629	6990.31	0.738596	28.9115	123.777	213.243	0.58045
JLZir1-03	28.2904	590.989	1.49035	0.0194277	8.30876	0.195831	2.95992	4.20005	0.38049	15.8593	4.72275	54.6083	19.0601	87.5688	18.3144	187.244	31.924	7130.37	0.481594	32.319	142.679	214.156	0.666242
JLZir1-04	20.5967	1260.65	1.41734	0.0878345	11.2227	0.745876	9.51132	10.5175	0.96508	36.4093	10.4976	116.181	40.868	183.388	37.5033	367.499	60.6642	7038.92	0.65111	67.5426	302.528	391.981	0.771792
JLZir1-05	34.9085	711.726	1.17533	0.0492621	7.88231	0.392525	4.99521	6.38493	0.631423	22.3976	6.45549	69.2116	23.4041	102.836	21.1366	208.555	34.4262	8017.16	0.412086	28.6541	130.976	180.717	0.724755
JLZir1-06	47.5038	930.606	1.1891	0.0991437	8.73406	0.544862	6.98359	8.41005	0.869202	29.0195	8.31264	90.8094	31.1013	134.935	27.4198	264.907	43.0779	7504.75	0.468248	37.3473	169.902	216.297	0.785503
JLZir1-07	45.7229	922.638	1.19681	0.103396	9.08587	0.550985	6.69499	7.47325	0.892152	27.9197	8.16625	88.5251	29.9623	134.149	27.4113	266.082	43.4071	7593.77	0.494771	38.1438	177.55	227.623	0.780021
JLZir1-08	37.5409	2379.96	2.88274	0.173242	10.6462	0.729643	9.79515	14.4067	1.61522	77.1487	22.0221	233.752	76.9621	331.674	62.8248	580.603	92.8287	7317.49	1.20914	162.296	757.494	652.135	1.16156
JLZir1-09	35.9253	1093.04	1.2716	0.128227	10.2389	0.847585	10.2221	11.475	1.03066	38.9737	10.5104	110.563	36.0908	154.154	30.5037	286.421	47.138	7816.81	0.667488	57.1564	257.658	305.878	0.842355
JLZir1-10	24.3954	459.781	1.61663	0.00757435	6.94443	0.0758188	1.68326	2.68986	0.249373	11.5854	3.67189	41.8568	14.8468	69.9193	14.6104	151.379	25.9618	8978.23	0.622779	24.7106	109.211	192.662	0.566855
JLZir1-11	21.1967	510.13	1.76582	0.0106882	8.88999	0.103413	1.81474	3.10522	0.302874	13.2466	4.02383	47.3934	16.3229	76.5726	15.9658	161.168	27.7548	8968.88	0.568018	33.9028	159.346	261.428	0.609522
JLZir1-12	32.783	656.313	1.062	0.0213816	7.62619	0.268674	3.78139	5.92301	0.727284	21.2237	6.12066	65.3391	21.4505	95.5295	19.1481	187.827	31.711	7612.49	0.299131	25.2608	117.397	142	0.826743
JLZir1-13	10.9617	623.445	1.96924	0.0198217	12.6813	0.127793	1.90441	3.28839	0.273051	14.0653	4.4146	52.4497	18.9659	90.9483	19.6366	207.905	34.1934	9829.08	0.97806	135.635	610.453	837.259	0.729108
JLZir1-14	13.845	1075.26	1.89882	0.045169	13.4324	0.269983	4.37534	6.85546	0.651599	29.4917	8.81807	98.6729	33.951	156.018	32.3985	324.401	52.6499	9798.15	0.78023	132.719	594.26	772.872	0.768898
JLZir1-15	17.7493	509.219	1.89886	0.00345661	10.4974	0.0622323	1.23003	2.57932	0.191165	11.6329	3.71924	43.8552	16.0311	76.8348	16.4939	170.07	29.4269	9823.32	0.67903	44.4397	200.435	383.368	0.522827
JLZir1-16	10.8726	704.446	2.0204	0.018725	13.8855	0.130523	2.28429	3.61639	0.306096	15.7085	5.29583	59.979	21.898	105.445	22.9704	229.815	39.6654	10130.9	0.980526	91.7844	403.749	733.163	0.550695
JLZir1-17	32.1074	1108.11	1.25707	0.0745892	9.3794	0.594413	8.12484	9.48565	0.870055	36.3868	10.1996	112.002	36.0626	158.32	31.3209	306.863	49.6065	7599.17	0.519914	46.8863	214.669	265.761	0.807751
JLZir1-18	36.8422	1172.3	1.52177	0.112283	9.53432	0.73205	9.06229	10.6597	0.845185	38.0464	10.6853	117.647	38.3131	170.296	33.6363	319.054	53.3525	7659.06	0.543824	49.0194	230.928	285.175	0.809776
JLZir1-19	33.9494	1081.6	1.1819	0.0749173	9.19334	0.600477	8.32105	9.68194	0.908955	37.2997	10.241	107.77	35.1469	154.545	30.6691	295.8	48.4436	7393.26	0.432041	41.2421	189.411	225.114	0.841401
JLZir1-20	25.7536	496.434	0.938707	0.037143	6.10345	0.187256	2.73649	3.9269	0.526696	14.3912	4.05789	44.5398	15.7101	71.2239	14.4929	141.797	24.473	7965.35	0.412567	26.3573	120.479	163.279	0.73787
JLZir1-21	37.4544	2207.09	2.16834	0.136143	10.6397	0.672543	8.49094	9.71486	0.987644	50.7561	16.1483	192.259	68.6948	304.784	56.8561	550.336	87.3701	7757.77	1.34439	155.122	712.085	768.034	0.927154
JLZir1-22	33.2876	1734.82	1.90999	0.137538	11.0895	0.698274	8.74828	10.3251	0.935564	45.3949	13.5565	158.393	54.8019	238.413	45.5993	439.354	68.8256	8011.83	1.07537	127.753	580.328	644.236	0.900801
JLZir1-23	31.5623	1145.72	1.18031	0.119601	10.2213	0.717073	8.35137	9.44039	0.847609	33.9274	9.65878	107.185	36.3913	161.792	31.4419	316.549	51.3068	8209.71	0.718197	65.2106	303.303	416.051	0.729005
JLZir1-24	28.1203	955.753	1.43462	0.0702515	8.84535	0.363128	4.81196	6.27572	0.508202	24.5653	7.28877	85.4873	29.5199	138.036	27.167	280.849	47.0444	8658.62	0.85003	66.6693	302.556	467.658	0.646961
JLZir1-25	39.1244	833.708	1.09928	0.0623349	7.95626	0.414949	5.94416	7.22411	0.742065	25.987	7.47038	82.5049	27.1272	120.42	23.7924	240.124	37.0269	8023.03	0.418844	28.7469	130.9	182.1	0.718833
JLZir1-26	35.7678	787.151	1.04219	0.0408823	7.90191	0.445161	5.385	7.04893	0.614635	24.9407	7.13591	76.4758	25.2698	111.867	22.089	221.196	35.5283	8273.66	0.426472	27.3651	120.294	171.876	0.699891
JLZir1-27	12.8493	1424.16	1.43522	0.124891	17.3957	0.55721	8.40673	10.9415	0.918952	40.4881	11.673	129.826	43.7436	204.164	41.7865	425.528	69.83	9668.87	0.814288	143.101	640.236	883.48	0.724675
JLZir1-28	37.5256	758.004	1.03211	0.0946794	7.92835	0.479161	6.11342	7.8265	0.78739	25.837	7.0841	73.8028	24.0803	109.078	21.0749	214.544	34.7822	7968.19	0.353412	28.9745	132.513	180.948	0.732328
JLZir1-29	11.848	1165.47	1.46067	0.0560993	12.3603	0.436029	5.84958	8.06562	0.930286	30.9134	9.29371	102.937	36.1678	171.3	34.3358	359.115	59.3748	9974.31	1.17921	90.1668	405.117	600.143	0.675035
JLZir1-30	19.2706	913.37	1.21872	0.0749221	9.25503	0.36943	5.68027	6.91941	0.808386	26.1542	7.78367	86.8331	29.0214	130.951	25.8782	261.932	42.6656	9037.3	0.631194	39.7262	179.13	236.693	0.756805
JLZir1-31	16.058	1076.33	1.32866	0.0569958	11.6275	0.329187	5.20596	7.60475	0.894954	29.2575	8.45111	98.7615	33.447	154.029	31.0992	325.876	52.143	9919.52	0.912588	68.6624	311.509	415.972	0.748869
JLZir1-32	49.9511	1265.84	1.31437	0.1425	9.34922	0.586894	7.57371	8.69973	0.990857	36.5018	10.7168	119.838	40.674	178.811	34.3906	337.243	54.1606	7670.65	0.690384	55.1029	254.397	303.588	0.83797
JLZir1-33	36.2575	485.952	1.31395	0.0073521	7.75874	0.158721	2.59366	3.7997	0.402704	14.487	4.16961	46.6819	15.6919	72.3193	14.394	150.382	24.3608	7749.42	0.361073	23.199	103.79	148.664	0.698154
JLZir1-34	24.1065	1256.93	1.56806	0.0764039	12.4045	0.631852	8.5027	10.68	0.947651	40.9458	11.4203	122.31	40.7975	179.05	34.414	347.88	55.784	8230.97	0.61373	62.6405	292.17	349.939	0.834917
JLZir1-35	30.8069	2063.6	2.61754	0.125449	13.5671	0.733093	9.21499	11.6326	1.16517	53.6089	16.4503	187.619	64.4419	291.805	54.8123	530.925	86.4894	9230.59	1.24486	225.651	1046.26	1116.91	0.936745
JLZir1-36	40.6739	1273.38	1.14536	0.162541	9.79261	0.712498	9.32679	10.1152	0.881197	36.9017	10.4837	117.832	40.0853	181.187	34.4319	338.274	56.0207	7731.12	0.675561	52.8994	238.028	328.659	0.72424
JLZir1-37	33.4754	1165.64	1.084	0.125383	11.0059	0.894592	9.5594	10.4314	0.944736	34.9729	10.1125	106.559	36.7169	164.601	32.1177	317.423	50.9405	8622.06	0.819193	80.0114	340.672	481.213	0.707945
JLZir1-38	32.3878	1103.91	1.14828	0.12803	10.6565	0.762987	9.44965	10.5301	0.876899	33.7571	9.39808	106.306	34.3617	153.414	30.1055	296.923	47.6233	8477.87	0.722337	68.9197	311.472	428.124	0.727529
JLZir1-39	39.7405	1197.27	1.23549	0.160338	10.781	0.811185	9.6675	10.9148	0.873858	35.0597	9.84675	109.042	37.2572	169.833	32.6368	319.504	52.4981	8463.71	0.830434	185.369	358.864	507.042	0.70776
JLZir1-40	33.1958	981.086	1.24336	0.057671	9.88436	0.44055	6.75588	9.18554	0.82189	32.8722	9.04816	97.9164	31.2767	139.665	27.0677	266.765	42.8549	8242.69	0.421151	47.1116	218.988	267.841	0.817605
JLZir1-41	32.807	1030.56	1.84512	0.0574208	8.53224	0.365467	4.76329	6.93344	0.725358	29.6844	8.57855	95.0505	32.5122	148.038	28.7971	296.224	48.2399	8076.13	0.798096	66.2689	285.96	374.806	0.762955
JLZir1-42	19.9441	2236.54	2.7708	0.12862	15.2201	0.71123	10.1439	11.0848	0.967206	50.4833	16.1297	192.645	69.5519	316.93	62.0468	589.958	95.352	9669.13	1.71022	343.036	1577.05	1701.91	0.926637
JLZir1-43	27.0855	356.642	1.28746	0.00973916	6.86221	0.051179	0.946752	1.84554	0.217244	8.91124	2.70085	31.5777	10.5917	51.8127	10.9254	113.297	18.7319	8568.49	0.366068	21.3811	96.127	163.618	0.587507
JLZir1-44	29.2759	863.867	0.976441	0.0576496	8.78304	0.479904	6.5314	7.82971	0.608438	27.2025	7.72181	83.1079	27.3292	123.073	24.4102	245.597	39.2478	8831.66	0.392725	37.6694	175.275	255.639	0.685634
JLZir1-45	23.4772	721.613	0.905686	0.0147358	7.11025	0.198325	3.00974	5.23742	0.421919	21.085	6.09664	66.6754	22.5705	103.541	20.9985	210.683	35.1798	9171.08	0.316589	31.6834	147.459	224.658	0.656374
JLZir1-46	38.2685	1564.88	1.8888	0.113626	10.4962	0.635179	8.58878	13.4069	1.38481	51.8871	14.8736	155.341	50.1486	219.541	42.7978	417.374	65.4977	7606.47	0.608409	81.3474	368.99	391.843	0.941679
JLZir1-47	35.9098	1405.19	1.5507	0.082019	10.1195	0.621475	7.75385	12.4086	1.18499	46.1821	12.9206	136.601	44.3038	196.075	37.9464	372.609	58.6822	7886.11	0.553171	65.8255	311.171	336.175	0.925621
JLZir1-48	25.4667	803.003	0.996683	0.0358401	8.30127	0.322881	4.6158	7.18612	0.687415	24.3588	6.89195	77.9718	25.3763	114.61	22.621	227.881	36.6256	8130.07	0.449018	37.0009	162.989	227.636	0.716009
JLZir1-49	26.5217	1773.4	2.08308	0.0604143	12.8957	0.494718	6.15488	8.73649	0.858178	45.5794	13.4679	148.566	53.1331	232.989	45.5553	442.75	80.2385	10460.4	1.00306	51.7754	916.755	903.646	1.01451
JLZir1-50	18.6703	480.535	1.28954	0.00582711	7.20984	0.0550338	1.0129	1.99525	0.21643	10.4918	3.19447	39.1593	14.0462	65.7345	14.0572	137.098	25.9389	11651.4	0.570172	12.013	163.976	281.648	0.582201
JLZir1-51	21.0001	1224.34	1.02946	0.156224	10.8047	0.720035	9.25724	10.8529	0.899302	36.8907	10.0171	105.228	36.5114	159.653	31.3053	298.135	52.9358	10943.7	1.00365	27.5403	437.591	604.549	0.72383
JLZir1-52	13.1531	716.4	1.52624	0.00750051	10.9091	0.0904623	1.61258	3.3196	0.29032	15.8477	5.23561	57.8833	21.0638	97.0323	20.5401	206.51	37.634	11345.5	0.843193	22.9944	358.069	466.606	0.767392
JLZir1-53	19.0217	1293.04	0.962112	0.0684284	11.2165	0.649768	9.05337	10.814	0.751251	35.5446	10.2472	113.27	38.5349	168.66	33.009	316.836	57.7313	12042.3	0.616514	24.4636	403.484	501.238	0.804975
JLZir1-54	15.2579	1315.67	0.921074	0.144328	11.2445	0.753195	9.1991	10.5791	0.838361	37.2127	10.6338	113.546	39.2499	171.899	34.0625	319.302	60.2489	11884.6	0.87368	32.679	499.02	680.253	0.73358
JLZir1-55	24.3104	1281.26	0.960032	0.0666072	11.2303	0.631966	9.35835	11.5958	0.906639	37.733	10.6143	114.004	38.1705	164.93	31.9477	299.417	55.5161	12233.5	0.540432	20.9272	361.484	436.812	0.827549
JLZir1-56	18.1484	978.023	0.934446	0.0172908	8.99864	0.236679	4.1624	6.15286	0.556514	25.2819	7.71495	83.7613	28.5079	129.598	26.3541	251.941	46.1184	12443.5	0.57294	18.6969	301.53	391.785	0.769631
JLZir1-57	47.8451	3036.85	2.40446	0.142013	11.249	0.691546	9.90051	17.6967	2.33966	89.5115	26.5725	273.374	92.142	385.304	72.7091	655.277	115.405	9411.53	1.00654	46.6014	889.316	638.482	1.39286
JLZir1-58	20.8769	2003.27	1.86536	0.162946	15.8247	0.833712	9.21063	12.9122	0.968645	56.9701	17.0881	187.96	65.5651	278.263	55.9209	517.58	96.7753	10339.7	1.25422	74.4909	1168.24	1221.87	0.956101
JLZir1-59	15.2652	2040.29	2.13347	0.173823	15.1333	0.798514	9.25271	10.7621	0.86334	40.556	13.2754	161.178	62.6736	296.251	59.9763	554.599	108.743	9803.43	1.97981	92.8873	1395.36	1670.04	0.835527
JLZir1-60	45.1106	1779.43	1.48578	0.102866	9.54501	0.613071	8.9314	15.465	1.82482	62.43	17.2759	177.715	59.602	246.028	47.4304	436.92	78.9676	8169.47	0.69113	25.002	418.276	335.285	1.24752
JLZir1-61	41.1928	1340.92	1.21654	0.137736	10.6312	0.773522	9.2698	9.87994	0.9528	37.3542	11.1425	122.002	43.0993	186.411	37.0011	337.752	63.624	8523.49	0.685654	16.9951	264	313.433	0.842286
JLZir1-62	47.0261	1529.48	0.949129	0.140993	9.54113	0.687603	8.16466	8.98394	0.927411	39.1674	12.2949	135.157	48.8954	211.312	40.3293	369.845	68.885	8170.9	0.7578	24.1359	368.393	403.812	0.912288
JLZir1-63	16.8651	1069.82	1.19334	0.0247956	10.9781	0.328404	5.31594	6.99057	0.623926	27.4253	8.39513	94.0871	34.0032	150.556	30.7431	292.221	54.7501	10981.5	0.736143	33.6089	497.37	660.075	0.753506
JLZir1-64	22.093	1187.7	0.785684	0.0543822	8.52893	0.440161	6.39324	8.60769	1.25438	30.6623	9.61044	107.412	37.8094	165.566	33.4172	315.951	59.3934	10463.9	0.549298	42.8418	672.694	770.962	0.872539
JLZir1-65	50.9059	1865.57	1.49336	0.198687	12.2631	0.872301	12.8168	17.7479	1.47342	65.5614	17.7984	184.046	61.7108	258.698	49.9528	456.51	83.3366	7975.72	0.691836	22.0872	350.657	342.393	1.02413
JLZir1-66	37.4401	3251.89	3.00608	0.312688	11.7759	0.666012	9.58054	18.5823	2.21541	101.924	29.3678	307.481	105.869	431.124	80.3145	716.676	128.295	8764.77	1.32298	75.5797	1263.71	936.304	1.34968
JLZir1-67	29.6136	1195.79	0.91597	0.050944	10.0522	0.60264	7.5099	9.83249	0.95428	36.0144	10.8482	112.486	38.1095	164.898	32.2706	303.904	55.4669	9905.71	0.460219	19.9856	306.111	366.298	0.835689
JLZir1-68	38.4956	925.199	1.03721	0.00484376	6.70241	0.150761	3.16656	6.31007	0.578292	27.0408	7.99999	85.3609	28.5856	124.635	24.0652	229.384	43.4918	9516.68	0.291569	10.1784	141.51	172.66	0.819585
JLZir1-69	40.3977	1191.61	1.36097	0.118089	9.43565	0.641491	8.68808	10.1989	0.704032	37.1738	10.3593	111.288	37.0683	159.1	30.6422	283.689	52.1575	8493.45	0.509475	10.9312	164.854	186.9	0.882041
JLZir1-70	25.0574	1104.3	0.959412	0.0427947	8.54215	0.479241	5.63586	8.68481	0.801843	34.5879	9.76946	100.97	33.6313	147.94	28.1629	276.642	49.8511	9177.28	0.415093	14.3933	218.278	239.002	0.913289
JLZir1-71	35.184	1505.32	1.00862	0.0743177	10.3441	0.723621	8.49366	9.87563	0.938227	37.3309	11.101	127.466	45.7898	204.417	38.7785	368.669	70.3837	9506.08	0.686803	25.3576	360.187	422.051	0.853419
JLZir1-72	45.6135	1193.26	0.873549	0.13817	9.38757	0.61859	9.44404	10.6715	0.839916	37.2364	10.7825	112.235	37.1522	160.429	31.2561	294.106	52.659	9079.75	0.48709	12.5836	185.73	213.467	0.870064
JLZir1-73	25.1933	449.196	0.787678	0	6.85059	0.131729	1.43377	3.29692	0.273187	12.9789	3.73918	35.4955	14.19	61.497	13.2307	134.299	24.0149	9724.55	0.291423	7.19109	90.1195	130.604	0.69002
JLZir1-74	39.7903	1043.79	1.21218	0.100164	8.48483	0.474507	6.32179	7.24533	0.728038	27.9095	8.14541	94.1205	31.8424	142.366	27.8739	260.896	48.9228	8729.74	0.450965	14.7023	220.071	255.493	0.861359
JLZir1-75	30.8382	898.997	0.757876	0.0288151	7.26158	0.322605	5.66907	7.34852	0.621544	28.5923	8.18234	84.3365	28.1096	120.833	23.3044	219.598	39.8138	9164.34	0.319563	10.528	162.408	178.421	0.910249
JLZir1-76	24.5437	1074.85	0.881975	0.0516487	9.28562	0.470313	7.50824	8.89846	0.78626	33.28	9.4681	100.648	34.7077	145.987	27.8244	258.407	47.9098	9150.83	0.333246	15.9205	235.384	254.081	0.926413
JLZir1-77	16.0863	1051.66	1.29346	0	9.45382	0.225753	4.26352	6.12677	0.990138	30.7849	8.50987	95.0591	31.9949	145.305	28.1442	268.969	50.1091	10540.6	0.735388	15.8259	230.998	267.347	0.86404
JLZir1-78	18.1033	829.097	1.06978	0.0569773	8.09748	0.191909	2.64328	3.90072	0.579742	19.251	6.1598	70.1034	25.5979	112.979	22.4943	223.814	43.0925	10897.4	0.649809	12.7866	173.058	219.218	0.789435
JLZir1-79	27.2368	1423.99	1.81339	0.130138	11.3929	0.693486	9.2243	11.0026	0.987029	39.8712	11.4844	125.151	44.411	199.994	39.6891	379.06	64.5708	8529.63	0.812448	101.059	449.26	546.057	0.822735
JLZir1-80	28.188	955.599	1.47124	0.0347421	8.57584	0.256002	4.41258	7.08404	0.686605	28.4667	8.2608	88.3184	30.3059	133.691	26.6921	259.683	42.4691	8713.1	0.426876	52.7244	225.453	283.386	0.795567
JLZir1-81	23.2156	779.106	1.32529	0.0104799	7.46978	0.131616	2.47603	5.08719	0.513474	21.9113	6.3413	71.0131	24.2711	109.907	22.6022	215.308	36.5277	8877.27	0.445835	41.7589	178.119	246.234	0.723374
JLZir1-82	44.6839	2771.55	3.30991	0.15528	12.4456	0.797976	9.38059	16.8887	1.97291	89.7013	25.1733	268.35	88.0702	374.104	71.5453	647.343	103.811	7475.23	1.25137	226.197	1010.03	801.064	1.26086
JLZir1-83	18.2827	1107.05	1.33128	0.0470928	9.06131	0.397251	6.18403	8.24627	1.19662	31.8574	9.07318	99.762	34.183	155.498	31.3255	306.088	52.1014	9245.16	0.568415	159.375	707.608	840.071	0.84232
JLZir1-84	23.0849	971.764	1.18545	0.021652	8.1774	0.335134	5.17848	7.69271	0.992219	28.0794	7.98327	87.8281	29.6398	135.182	26.8797	260.764	44.5766	9175.33	0.525075	111.192	496.392	608.734	0.815449
JLZir1-85	18.5829	838.558	1.20423	0.0198899	7.39687	0.135806	2.82424	5.29235	0.846053	22.9113	6.86526	75.3716	26.0691	118.727	23.2451	231.793	39.021	9353.68	0.367939	93.9549	419.722	515.341	0.814454
JLZir1-86	29.5911	1104.98	1.54576	0.0635534	11.7848	0.522964	8.48618	10.1237	0.912811	35.0412	9.93162	108.44	35.5837	159.606	32.0559	308.068	51.6958	9217.16	0.61755	59.5575	266.633	327.872	0.813222
JLZir1-87	59.0781	3539.4	4.5578	0.19345	13.0564	0.815514	10.8259	21.4335	2.44054	115.828	32.7789	351.803	117.851	495.569	92.913	852.537	138.565	7989.1	1.62874	219.251	1028.78	730.859	1.40763
JLZir1-88	42.8378	3093.43	3.8549	0.136797	11.8248	0.717494	9.82335	16.1698	1.97541	94.8307	27.3691	300.51	101.268	437.271	82.1087	750.636	123.115	7756.66	1.52741	193.962	876.438	674.185	1.3
JLZir1-89	36.8544	1372.97	1.6586	0.094881	11.2497	0.724097	9.76041	12.7245	1.19502	46.6479	12.6537	135.816	44.683	197.41	38.9342	373.728	61.0238	8176.73	0.532395	64.499	286.688	309.117	0.927443
JLZir1-90	38.6054	1484.35	1.60999	0.124786	11.377	0.70902	9.409	13.0181	1.28058	48.9296	13.9978	144.681	48.9716	212.405	42.3796	405.214	66.2164	8127.76	0.66733	75.6294	338.125	358.081	0.944269
JLZir1-91	42.4325	664.467	1.33156	0.0359253	8.15119	0.305859	4.08107	5.9523	0.585329	20.1051	5.90909	64.7197	21.7803	96.6608	20.1035	198.883	33.4039	8031.62	0.515607	32.6453	142.264	181.724	0.782856
JLZir1-92	42.564	1101.67	1.23779	0.105042	10.9232	0.772322	9.32072	11.0958	1.08974	36.2024	10.2869	106.811	36.3725	157.284	31.8892	301.342	50.7982	8059.93	0.516486	53.5233	236.272	266.464	0.886694
JLZir1-93	50.2594	1299.72	1.41491	0.121724	10.9701	0.73491	9.22656	10.9809	1.36872	42.3163	12.2638	127.07	42.9162	187.774	37.7099	359.442	59.511	7907.5	0.557213	59.9371	273.568	286.357	0.955338
Session 3
JLZir1-01	30.8717	735.452	1.23862	0.013861	7.4439	0.12697	2.52034	5.20195	0.590947	22.691	6.71507	71.7632	24.2695	107.594	21.9463	210.157	36.017	8738.72	0.364548	25.4787	111.403	144.959	0.768512
JLZir1-02	44.5779	976.919	1.21299	0.106098	10.6185	0.700669	9.92469	10.7674	0.954071	35.0768	9.57577	99.3652	32.414	141.773	28.0162	270.658	44.7275	8141.43	0.47783	37.6251	162.873	185.827	0.876477
JLZir1-03	12.8481	433.056	1.60035	0.0048139	9.0099	0.0366943	0.796879	1.85769	0.194197	8.98336	2.96106	36.414	13.6279	64.2806	14.2593	152.891	25.754	11107.3	0.705927	51.563	222.677	435.098	0.511787
JLZir1-04	42.782	1069.2	1.28053	0.134616	9.52478	0.467001	7.18845	9.57167	1.11326	37.7358	10.5286	107.428	34.9205	152.287	30.9027	290.185	47.6495	8036.26	0.468123	49.5344	224.329	234.375	0.957136
JLZir1-05	49.6405	3643.6	4.32686	0.169567	12.6508	0.724349	10.8564	28.5284	3.73604	136.942	37.8023	380.098	120.504	502.174	93.5306	840.071	133.825	7831	1.39358	266.458	1228.52	790.161	1.55477
JLZir1-06	58.3438	3370.99	3.83461	0.218413	11.5875	0.743671	10.5839	23.9172	3.34715	122.5	33.9862	341.13	113.129	459.13	84.7419	771.82	121.367	7759.96	1.23717	248.704	1135.98	752.16	1.51028
JLZir1-07	51.2904	1217.1	1.42195	0.0795244	10.0081	0.489798	7.68186	10.6586	1.35136	42.7322	11.8873	121.854	40.4356	174.398	34.2809	316.944	53.7247	8089.34	0.479631	63.3366	281.725	273.427	1.03035
JLZir1-08	20.5044	384.15	1.29351	0.0102078	6.23952	0.0756339	1.15895	2.18921	0.228844	9.50624	3.0095	33.3387	12.4278	57.1229	12.2155	121.489	21.0157	9894.54	0.443574	22.2869	95.6354	167.103	0.572314
JLZir1-09	20.7498	492.599	1.31303	0.00215414	6.81484	0.0812097	1.61396	2.79208	0.343678	11.9677	3.85614	43.2675	15.5427	71.6877	14.9139	153.061	26.0826	9837.39	0.433159	23.2924	108.739	181.213	0.600065
JLZir1-10	51.6924	555.741	1.182	0.0274906	6.82887	0.216733	3.3559	4.83822	0.478824	16.829	5.01172	53.6866	18.5849	82.0844	16.9303	168.101	28.9226	7567.96	0.441508	19.7502	89.2771	123.69	0.721784
JLZir1-11	52.6737	1244.3	1.3118	0.107081	9.92303	0.701812	9.41265	10.8187	1.18761	38.8085	11.5026	119.001	41.0994	181.684	34.9162	327.657	57.5242	7808.36	0.562755	48.8468	229.308	246.025	0.932051
JLZir1-12	53.5458	813.786	1.1023	0.0975246	8.6279	0.521746	7.08109	8.3207	0.995432	27.2404	7.59358	80.2765	26.9698	117.116	23.4984	221.907	37.8286	7864.48	0.431087	28.1645	131.6	158.681	0.829335
JLZir1-13	43.456	1252.31	1.2578	0.0998302	9.00175	0.492236	6.21715	8.65339	0.907829	35.7141	10.8115	118.004	40.8958	181.039	35.0379	330.136	55.0106	8624.69	0.751625	63.6848	280.337	327.155	0.856894
JLZir1-14	54.2083	2157.44	2.17349	0.188596	10.3325	0.713355	9.42228	14.3729	1.78748	69.0362	19.9248	212.749	72.1055	313.327	59.9245	562.929	92.5506	7951.02	1.04353	125.345	559.691	525.082	1.06591
JLZir1-15	10.5533	1142.85	1.32951	0.00628772	14.5423	0.0940501	1.85232	4.76785	0.488186	26.8704	8.64911	100.064	36.2571	170.239	35.5972	352.079	60.4236	10315	0.581415	112.095	492.2	660.505	0.745188
JLZir1-16	20.8537	842.408	1.29573	0.004316	8.45387	0.0825533	1.49918	3.93224	0.541439	20.2759	6.37318	74.2616	26.6275	122.86	25.2482	247.813	42.6832	10263.7	0.632406	63.9755	293.542	376.634	0.779384
JLZir1-17	27.3119	604.675	1.0126	0.027467	6.83828	0.114242	2.13072	3.46409	0.496595	16.3108	4.95003	53.7708	18.8066	87.4317	17.9438	176.046	30.7104	9599.27	0.396437	29.8792	137.739	182.387	0.755202
JLZir1-18	25.8079	615.398	1.19034	0.0107683	6.61746	0.10648	1.65418	3.52032	0.511177	15.9334	4.95742	56.1809	19.7012	88.3165	18.2021	177.864	30.3641	9798.83	0.453064	30.3878	135.384	181.84	0.744523
JLZir1-19	14.1831	646.731	1.86917	0.0136041	12.5492	0.134379	2.16709	3.78817	0.325596	16.5034	4.89155	59.0361	21.1102	101.896	22.1395	226.148	39.6501	11318.5	1.04492	132.566	581.686	929.473	0.625823
JLZir1-20	20.7911	969.311	1.92333	0.0355676	15.636	0.283918	4.00696	6.04048	0.502252	24.573	7.42628	86.7197	30.795	143.989	31.0003	314.689	54.0843	9929.21	1.30421	266.344	1221.41	1302.39	0.937823
JLZir1-21	20.8372	1143.85	2.39134	0.067451	19.2283	0.337398	5.21114	7.41081	0.648948	29.0014	9.23047	105.76	37.8405	180.291	38.1237	387.476	67.5762	10039.6	1.77611	411.946	1903.94	1672.88	1.13812
JLZir1-22	24.2816	1427.93	1.48185	0.165926	10.9857	0.616927	8.64512	9.42244	1.1752	38.3531	11.7653	132.615	49.0792	225.269	43.7098	421.166	71.3293	8621.4	1.49328	96.0398	432.059	493.817	0.874939
JLZir1-23	22.0391	1314.07	1.44923	0.109929	13.7213	0.656609	8.79184	10.9898	1.2892	38.8078	11.2604	125.957	45.3594	205.154	42.6327	418.782	72.2974	9942.9	1.45166	97.8104	453.439	588.073	0.771059
JLZir1-24	39.2354	1312.73	1.4349	0.18161	12.5062	0.941598	10.3242	11.6261	1.14857	40.9223	11.775	129.176	45.8642	200.896	40.5539	391.475	65.3808	8759.46	0.999586	63.8474	292.035	376.973	0.774683
JLZir1-25	35.7723	1250.5	1.23166	0.158521	10.6672	0.719422	9.89964	10.4783	0.907637	36.0355	11.0421	124.745	43.7553	195.564	38.6025	367.609	63.8648	8088.37	0.939625	66.5741	298.438	380.042	0.785278
JLZir1-26	42.2991	1613.01	1.79539	0.191533	11.5284	0.811879	10.9485	16.115	1.48821	62.5949	17.2456	181.299	59.0303	251.12	49.0772	470.274	76.4651	7051.83	0.878777	79.4268	369.643	362.986	1.01834
JLZir1-27	40.7158	1346.34	1.33206	0.149105	10.3763	0.733132	10.0397	13.8002	1.18339	50.3861	14.0978	144.192	48.0557	201.613	40.7963	379.157	63.3007	6915.39	0.690671	58.9332	274.781	288.827	0.951369
JLZir1-28	28.4859	680.01	1.14063	0.0322702	7.78867	0.301746	5.01829	6.73226	0.62755	24.1101	6.80045	72.016	24.1062	105.149	21.1099	209.959	34.8603	7627.08	0.400939	23.2114	105.407	136.009	0.774995
JLZir1-29	16.8737	741.887	1.27727	0.0265654	10.3354	0.263892	3.47858	5.01148	0.467085	21.4633	6.52485	72.0458	25.2501	113.584	23.5415	230.443	39.0631	9720.17	0.714308	105.388	484.199	672.997	0.719467
JLZir1-30	30.1959	668.585	0.996625	0.0287399	7.04315	0.221464	3.76766	4.89301	0.442654	20.0586	6.11374	67.5021	23.8636	104.19	21.6401	207.822	34.9113	8279.27	0.42651	32.2721	153.328	200.668	0.764088
JLZir1-31	31.0507	984.199	1.18781	0.0625459	8.75694	0.493326	7.031	9.81468	0.948085	35.7246	9.93811	106.134	34.6684	148.711	30.1474	290.068	47.2475	7500.22	0.492248	50.7711	235.202	257.299	0.914119
JLZir1-32	23.0839	1080.45	0.98779	0.124777	9.34871	0.644507	8.4687	9.3495	0.870836	34.1356	9.59912	105.42	37.5331	165.604	33.2336	318.898	53.58	7466.14	0.662452	70.596	326.815	419.059	0.77988
JLZir1-33	29.9473	997.847	0.829136	0.0824716	9.23289	0.52443	7.21551	9.09096	0.745729	31.5388	8.95559	97.6676	34.3303	153.769	30.3786	289.573	49.8361	7539.44	0.571441	60.4989	280.659	363.656	0.771769
JLZir1-34	39.9233	1083.66	0.988115	0.12647	8.07652	0.516551	7.27033	8.52925	0.933981	33.3218	10.0512	109.267	37.1906	164.52	32.4249	308.084	53.6001	6818.07	0.506413	53.6545	258.852	277.238	0.93368
JLZir1-35	44.9671	1256.56	0.941476	0.164767	8.94754	0.704601	8.02749	9.68549	0.966839	40.6154	11.8771	126.383	42.6998	188.057	37.0553	358.135	61.2266	7209.63	0.434067	61.2679	286.79	309.592	0.926348
JLZir1-36	41.8255	1159.75	1.22069	0.0855544	10.0522	0.573086	8.53808	11.6848	1.37135	40.2485	10.7326	113.857	37.2537	155.42	31.4324	306.25	49.41	7555.71	0.461012	51.2565	245.059	255.613	0.958709
JLZir1-37	49.1047	751.984	1.43764	0.0454451	8.32321	0.267207	3.79363	5.71328	0.659726	21.8136	6.14897	68.2736	23.7324	105.722	22.4653	219.445	37.7659	7395.26	0.489989	43.6609	193.176	255.326	0.756585
JLZir1-38	39.0488	1355.66	1.40102	0.133576	10.3926	0.626547	8.81971	12.8379	1.37706	46.386	12.7786	132.499	43.3146	183.24	36.883	345.513	57.756	7798.45	0.521896	66.1901	308.216	305.23	1.00978
JLZir1-39	45.9326	1896.02	2.02484	0.166709	11.823	0.703619	10.461	16.5435	1.94055	63.5563	17.8191	184.646	60.7509	257.079	51.0691	473.469	80.6658	7757.18	0.741602	108.302	504.02	441.972	1.14039
JLZir1-40	55.8998	1292.61	1.34427	0.136403	10.0028	0.720113	9.09228	9.71189	1.09117	41.2526	11.9261	124.376	41.9098	179.178	34.8349	330.067	55.8636	7545.62	0.583324	45.239	216.5	229.161	0.94475

## Sheet: Tables S3
Table S3. U-Pb isotopic data of Jilin zircon obtained with CA-ID-TIMS.
	Dates (Ma)							Composition				Ratios
	206Pb/				207Pb/									206Pb/						207Pb/
Fraction	238U	±2σ	207Pb/	±2σ	206Pb	±2σ		Th/	Pb*	Pbc	Pb*/	206Pb/	208Pb/	238U		206Pb/		207Pb/		206Pb		Corr.
	<Th> a	abs	235U b	abs	<Th> a	abs	% disc c	U d	(pg) e	(pg) f	Pbc g	204Pb h	206Pb i	<Th> ia	±2σ %	238U i	±2σ %	235U i	±2σ %	<Th> ia	±2σ %	coef.
JiLin (chemically abraded)
jilin01	117.584	0.0415842	117.708	0.143958	120.221	2.83777	3.40206	0.949621	25.5662	0.201625	126.801	6848.85	0.301667	0.0184076	0.035689	0.0183964	0.0339351	0.122912	0.129527	0.0484496	0.115905	0.404241
jilin02	117.623	0.0422569	117.665	0.142988	118.517	2.87286	2.0786	0.828257	26.9123	0.237259	113.43	6309.66	0.263123	0.0184137	0.0362546	0.0184018	0.0349535	0.122864	0.128699	0.0484146	0.117412	0.336592
jilin03	117.635	0.044507	117.62	0.212218	117.32	4.34347	1.11639	0.776855	35.3919	0.614557	57.5893	3253	0.246797	0.0184157	0.0381811	0.0184034	0.0371078	0.122814	0.191078	0.04839	0.181293	0.284832
jilin04	117.665	0.0693398	117.75	0.557344	119.456	11.727	2.8459	0.761471	4.53099	0.209274	21.651	1238.87	0.241911	0.0184204	0.0594692	0.0184081	0.0588395	0.122957	0.501305	0.0484339	0.496476	0.123887
jilin05	117.668	0.0559551	117.799	0.134077	120.458	2.4972	3.4177	1.10998	38.6528	0.173879	222.297	11554.9	0.352586	0.0184208	0.0479887	0.0184106	0.0462221	0.123013	0.120548	0.0484545	0.100814	0.503208
a Corrected for initial Th/U disequilibrium using radiogenic 208Pb and Th/U[magma] = 2.8 ± 1.0 (2s).
b Isotopic dates calculated using λ238 = 1.55125E-10 (Jaffey et al. 1971) and λ235 = 9.8485E-10 (Jaffey et al. 1971).
c % discordance = 100 - (100 * (206Pb/238U date) / (207Pb/206Pb date))
d Th contents calculated from radiogenic 208Pb and 230Th-corrected 206Pb/238U date of the sample, assuming concordance between U-Pb Th-Pb systems.
e Total mass of radiogenic Pb.
f Total mass of common Pb.
g Ratio of radiogenic Pb (including 208Pb) to common Pb.
h Measured ratio corrected for fractionation and spike contribution only.
i Measured ratios corrected for fractionation, tracer and blank.
All common Pb assumed to be laboratory blank. Total procedural blank less than 0.05 pg for U.
Blank isotopic composition: 206Pb/204Pb = 18.10 ± 0.27, 207Pb/204Pb =15.54 ± 0.14, 208Pb/204Pb = 37.82 ± 0.41 (1s).
Corr. coef. = correlation coefficient.
Ages calculated using the decay constants λ238 = 1.55125E-10 y-1 and λ235 = 9.8485E-10 y-1 (Jaffey et al. 1971).
238U/235U ratio of sample is predicted at 137.818 ± 0.045 (Hiess et al., 2012).
Weighted mean 206Pb/238U age (Th-corrected): 117.626 ± 0.021/0.038/0.13 Ma (n = 5, MSWD = 1.9)

## Sheet: Table S4
Table S4. SIMS U-Pb dating results for Jilin zircon
	Rediogenic isotopic ratios								Isotopic age (Ma)
Sample/	207Pb	±1s	207Pb	±1s	206Pb	±1s	Rho		207Pb	±1s	207Pb	±1s	206Pb	±1s	[U]	[Th]	Th/U	f206%
spot #	206Pb	%	235U	%	238U	%			206Pb		235U		238U		ppm	ppm
SIMS results (IGGCAS)
Zr-Jilin@01	0.0480238	1.26058	0.123002	2.22993	0.0185761	1.83944	0.824886		100.444	29.5488	117.79	2.48304	118.65	2.16291	788.729	798.294	1.01213	{0.93}
Zr-Jilin@02	0.0486236	2.3791	0.126194	2.87427	0.018823	1.61285	0.561135		129.721	55.0319	120.672	3.27554	120.213	1.92118	433.156	441.281	1.01876	{0.78}
Zr-Jilin@03	0.0485749	2.08467	0.12168	2.66339	0.0181679	1.65765	0.622383		127.365	48.3418	116.594	2.93794	116.067	1.90705	241.346	232.212	0.962151	{0.76}
Zr-Jilin@04	0.0493611	1.80219	0.122415	2.34567	0.0179866	1.50142	0.640082		165.02	41.5866	117.259	2.60096	114.919	1.71035	326.543	270.434	0.828171	{0.73}
Zr-Jilin@05	0.0481708	2.29614	0.121195	2.8898	0.0182474	1.75461	0.607174		107.666	53.3596	116.155	3.17674	116.57	2.02729	201.171	196.734	0.977941	{0.70}
Zr-Jilin@06	0.0488604	1.5921	0.123685	2.20826	0.0183594	1.53024	0.69296		141.139	36.9542	118.408	2.47105	117.279	1.77867	488.39	521.356	1.0675	{0.67}
Zr-Jilin@07	0.0487843	2.02154	0.124597	2.52525	0.0185236	1.51337	0.599295		137.478	46.8116	119.231	2.84481	118.318	1.77451	523.139	468.106	0.894803	{0.53}
Zr-Jilin@08	0.0490293	1.89159	0.124091	2.42752	0.0183562	1.52143	0.626741		149.234	43.7481	118.774	2.72467	117.259	1.76812	329.804	303.812	0.921188	{0.49}
Zr-Jilin@09	0.0488134	1.33054	0.124721	2.0208	0.018531	1.52095	0.752648		138.878	30.953	119.343	2.2779	118.365	1.78409	681.402	634.449	0.931093	{0.49}
Zr-Jilin@10	0.0487623	1.73311	0.120825	2.29365	0.017971	1.5024	0.655023		136.416	40.2219	115.82	2.51371	114.82	1.71001	343.954	337.716	0.981864	{0.48}
Zr-Jilin@11	0.0474904	1.2671	0.120894	2.00755	0.0184628	1.55715	0.775646		73.9605	29.8469	115.882	2.20094	117.934	1.81996	678.474	656.346	0.967386	{0.47}
Zr-Jilin@12	0.0487222	1.38226	0.122602	2.06431	0.0182503	1.53321	0.742723		134.484	32.1704	117.428	2.29175	116.588	1.77173	525.135	415.837	0.791867	{0.47}
Zr-Jilin@13	0.0474999	1.97447	0.11966	2.48656	0.0182708	1.51143	0.607842		74.4314	46.272	114.764	2.70191	116.718	1.74848	277.492	240.422	0.866409	{0.45}
Zr-Jilin@14	0.0488621	2.01107	0.121051	2.53493	0.0179678	1.54321	0.608776		141.221	46.5407	116.024	2.78313	114.799	1.75615	293.154	311.327	1.06199	{0.42}
Zr-Jilin@15	0.0473703	1.55838	0.121022	2.18406	0.0185292	1.53022	0.700632		67.9341	36.673	115.998	2.39694	118.354	1.7948	506.35	339.724	0.670927	{0.41}
Zr-Jilin@16	0.048878	1.61315	0.122816	2.24099	0.0182239	1.55557	0.694142		141.982	37.4313	117.622	2.49201	116.421	1.795	589.022	542.445	0.920925	{0.40}
Zr-Jilin@17	0.0463324	1.42308	0.122629	2.47542	0.0191959	2.02547	0.818234		5.63651e-11	48.8088	117.453	2.74932	122.572	2.45968	581.598	636.355	1.09415	{0.39}
Zr-Jilin@18	0.0497252	1.46856	0.124342	2.10426	0.018136	1.50706	0.716197		182.17	33.8612	119.001	2.36568	115.865	1.73079	463.358	367.448	0.79301	{0.38}
Zr-Jilin@19	0.0475194	1.54733	0.118381	2.16797	0.018068	1.5185	0.700427		75.4099	36.3652	113.603	2.33278	115.434	1.73751	426.202	469.474	1.10153	{0.38}
Zr-Jilin@20	0.0485879	0.922127	0.123987	1.76149	0.0185074	1.50085	0.852031		127.993	21.5572	118.68	1.97491	118.216	1.75831	1412.52	1443.94	1.02225	{0.36}
Zr-Jilin@21	0.0488093	2.07455	0.123431	2.6007	0.0183409	1.56841	0.603072		138.681	48.0106	118.178	2.90549	117.162	1.82124	247.716	205.579	0.829898	{0.36}
Zr-Jilin@22	0.0489367	1.14834	0.124601	1.9075	0.0184665	1.52311	0.798486		144.8	26.7197	119.235	2.14821	117.957	1.78052	1262.67	730.415	0.578468	{0.34}
Zr-Jilin@23	0.0473239	1.77761	0.120649	2.35511	0.0184903	1.54489	0.655971		65.603	41.7851	115.661	2.5778	118.107	1.80827	537.888	334.356	0.621609	{0.34}
Zr-Jilin@24	0.0483393	1.32827	0.120233	2.11647	0.0180394	1.64777	0.778548		115.906	31.0316	115.283	2.30914	115.253	1.8825	628.451	412.412	0.656235	{0.31}
Zr-Jilin@25	0.0485699	1.34122	0.123567	2.03656	0.0184516	1.53255	0.752517		127.122	31.2667	118.301	2.27677	117.863	1.79014	541.668	750.548	1.38563	{0.28}
Zr-Jilin@26	0.0480514	1.99955	0.122314	2.51316	0.0184616	1.52242	0.60578		101.801	46.6146	117.168	2.78488	117.926	1.77925	312.694	239.151	0.76481	{0.27}
Zr-Jilin@27	0.0496516	4.16707	0.117954	5.31272	0.0179962	1.59507	0.300236		76.2796	116.192	113.215	5.70763	114.98	1.818	112.016	58.3503	0.520913	{0.27}
Zr-Jilin@28	0.0484509	1.17099	0.122483	1.90603	0.0183347	1.5039	0.789023		121.345	27.3603	117.321	2.11401	117.123	1.74574	874.187	675.227	0.772405	{0.27}
Zr-Jilin@29	0.0493543	0.960143	0.125314	1.79253	0.0184151	1.5137	0.844448		164.696	22.289	119.879	2.02888	117.632	1.76468	1105.07	1607.15	1.45434	{0.27}
Zr-Jilin@30	0.050808	2.20145	0.121943	3.02073	0.0181339	1.57768	0.522285		136.855	59.4265	116.832	3.33919	115.851	1.81169	440.113	449.583	1.02152	{0.26}
Zr-Jilin@31	0.0489077	1.09974	0.123179	1.86981	0.0182666	1.51221	0.80875		143.41	25.6041	117.95	2.08431	116.691	1.74898	1004.76	781.466	0.777765	{0.25}
Zr-Jilin@32	0.0491308	1.52741	0.1262	2.15394	0.0186296	1.51871	0.705084		154.078	35.3848	120.677	2.45377	118.989	1.79078	516.582	571.9	1.10708	{0.25}
Zr-Jilin@33	0.0484771	1.2819	0.121909	1.974	0.0182389	1.50114	0.760455		122.619	29.9212	116.802	2.18034	116.516	1.73359	657.298	464.947	0.70736	{0.23}
Zr-Jilin@34	0.049761	0.933647	0.120805	2.24548	0.0182414	1.51161	0.673179		100.82	38.8101	115.801	2.46048	116.532	1.74592	1330.27	1451.55	1.09117	{0.22}
Zr-Jilin@35	0.0485604	0.856771	0.12399	1.76053	0.0185185	1.53799	0.873595		126.66	20.0436	118.683	1.97388	118.286	1.80289	1423.36	2145.64	1.50745	{0.22}
Zr-Jilin@36	0.048807	0.856389	0.124452	1.75136	0.0184935	1.5277	0.872292		138.568	19.9908	119.1	1.97009	118.128	1.78845	1637.42	2220.08	1.35584	{0.20}
Zr-Jilin@37	0.0483493	0.728231	0.123538	1.6678	0.0185315	1.50041	0.899635		116.394	17.0845	118.275	1.86374	118.368	1.76005	2042.54	2858.21	1.39934	{0.20}
Zr-Jilin@38	0.0492298	1.72081	0.120556	2.51024	0.0183058	1.51143	0.602105		87.5987	46.8447	115.576	2.74593	116.939	1.75176	496.862	403.66	0.81242	{0.19}
Zr-Jilin@39	0.0484335	1.3128	0.122935	1.9983	0.018409	1.50657	0.753927		120.499	30.6477	117.73	2.22376	117.593	1.7558	1302.32	807.794	0.620274	{0.16}
Zr-Jilin@40	0.0494686	1.64497	0.121595	2.38846	0.0182593	1.50619	0.630612		113.906	43.1619	116.517	2.63263	116.645	1.74133	667.96	445.455	0.66689	{0.15}
Zr-Jilin@41	0.0486377	0.85558	0.123205	1.72941	0.0183718	1.50295	0.869051		130.404	20.0021	117.973	1.92801	117.358	1.7481	1385.47	1385.07	0.999713	{0.13}
Zr-Jilin@42	0.0489167	1.9114	0.120339	2.62517	0.0182031	1.50315	0.572592		96.66	50.1675	115.38	2.86721	116.289	1.73256	440.793	374.31	0.849174	{0.12}
Zr-Jilin@43	0.0492188	0.965896	0.122349	1.92474	0.0183744	1.57172	0.81659		113.662	26.0064	117.199	2.1327	117.374	1.82835	1457.65	883.346	0.606005	{0.12}
Zr-Jilin@44	0.04879	0.724067	0.125498	1.66568	0.0186554	1.50007	0.900576		137.751	16.9204	120.044	1.88763	119.152	1.77119	2057.44	2955.88	1.43668	{0.11}
QH@1	0.0499259	0.74711	0.16891	1.74901	0.024947	1.5052	0.860599		152.896	20.7328	158.472	2.56948	158.845	2.36215	1856.77	855.109	0.460537	{0.10}
QH@2	0.0497375	0.780257	0.169047	1.74712	0.0249304	1.51999	0.869996		156.355	20.0422	158.591	2.56849	158.741	2.38383	1910.32	844.812	0.442235	{0.07}
QH@3	0.0495394	0.663735	0.175843	1.64248	0.0257438	1.5024	0.914712		173.441	15.4158	164.477	2.49713	163.855	2.43119	1978.26	1181.84	0.597414	{0.06}
QH@4	0.0495066	0.60603	0.172942	1.65403	0.0255145	1.51108	0.91357		155.461	15.6738	161.969	2.47929	162.414	2.424	2282.34	1258.2	0.551276	{0.04}
QH@5	0.0497468	0.739423	0.172233	1.69234	0.0252418	1.5051	0.889359		170.987	17.9651	161.355	2.5279	160.699	2.38923	1711.84	895.143	0.522911	{0.03}
QH@6	0.0490755	0.777269	0.168182	1.74239	0.024855	1.55942	0.894987		151.439	18.1111	157.84	2.5503	158.267	2.43846	1299.95	815.401	0.627256	{0.09}
QH@7	0.0490714	0.798748	0.16967	1.70419	0.025077	1.50541	0.883359		151.244	18.6094	159.132	2.5132	159.663	2.3745	1285.55	717.042	0.557769	{0.09}
QH@8	0.0494184	0.456147	0.171628	1.58175	0.0253105	1.50024	0.948467		156.414	11.6911	160.831	2.35543	161.131	2.38783	3403.09	840.956	0.247116	{0.03}
SIMS results (GIGCAS)
JiLin@01	0.0494013	0.75694	0.122926	1.74787	0.0183237	1.51512	0.866841		131.246	20.3678	117.721	1.94467	117.053	1.75773	719.074	694.881	0.966355	0.09
JiLin@02	0.0487123	0.790097	0.121081	1.7517	0.0182933	1.50632	0.85992		99.5021	21.0172	116.052	1.92283	116.861	1.74467	654.377	627.677	0.959197	0.09
JiLin@03	0.049177	1.0931	0.121423	2.00367	0.0183041	1.58244	0.789769		104.763	28.7934	116.361	2.20525	116.929	1.83391	522.949	473.081	0.904642	0.14
JiLin@04	0.0494829	1.13579	0.119481	2.20086	0.0180712	1.51356	0.687713		96.9257	37.3881	114.601	2.3879	115.454	1.73215	362.588	278.608	0.768388	0.19
JiLin@05	0.0503602	1.92096	0.119847	3.02027	0.0181866	1.66561	0.551477		89.0923	58.6586	114.933	3.28736	116.185	1.91814	178.152	107.089	0.601113	0.33
JiLin@06	0.0501427	1.80563	0.12116	2.54688	0.018057	1.51633	0.595367		131.689	47.4272	116.123	2.79851	115.365	1.73398	248.418	171.868	0.691849	0.19
JiLin@07	0.0505936	1.25263	0.123353	2.04728	0.0181128	1.50257	0.733935		166.524	32.1719	118.108	2.28523	115.718	1.72346	518.082	430.708	0.831351	0.15
JiLin@08	0.0507284	1.33825	0.118586	2.44589	0.0179489	1.51969	0.621322		95.2011	44.7591	113.789	2.6363	114.68	1.7276	220.69	166.442	0.75419	0.36
JiLin@09	0.0499136	1.42899	0.119689	2.44671	0.0181213	1.57893	0.645329		94.4947	43.6715	114.79	2.65912	115.771	1.81189	193.571	159.563	0.824313	0.26
JiLin@10	0.0485742	1.14174	0.117383	2.3164	0.0181196	1.50806	0.651035		48.4456	41.4684	112.697	2.47387	115.761	1.73039	305.719	254.265	0.831695	0.2
JiLin@11	0.0503408	1.36456	0.119306	2.27163	0.0178485	1.52315	0.67051		122.739	39.2247	114.443	2.46155	114.044	1.72202	277.251	246.515	0.889139	0.24
JiLin@12	0.0495515	1.66464	0.118447	2.6112	0.0181635	1.52598	0.584398		64.1904	49.7005	113.663	2.81176	116.039	1.75512	201.005	159.586	0.793942	0.29
JiLin@13	0.0490729	0.756157	0.122553	1.70332	0.0182629	1.50048	0.880914		131.906	18.8476	117.384	1.88993	116.668	1.73507	873.89	730.369	0.835767	0.05
JiLin@14	0.0488205	1.01142	0.120724	1.87774	0.018172	1.52296	0.811057		108.23	25.7402	115.728	2.05589	116.093	1.75246	756.187	748.007	0.989183	0.08
JiLin@15	0.0506281	1.3315	0.121501	2.78874	0.0180865	1.5287	0.548171		134.462	53.9224	116.432	3.07237	115.551	1.75094	222.56	212.305	0.95392	0.24
JiLin@16	0.0499432	1.03706	0.124787	1.89287	0.0182497	1.51166	0.798608		175.913	26.3587	119.402	2.13455	116.585	1.74676	371.065	244.465	0.65882	0.04
JiLin@17	0.0498753	1.29248	0.11798	2.55027	0.0180857	1.50169	0.588835		65.0126	48.3608	113.239	2.73638	115.546	1.71992	243.245	219.038	0.900485	0.33
JiLin@18	0.0495575	1.00213	0.121062	1.94307	0.0180463	1.52652	0.785621		131.198	28.0322	116.035	2.13282	115.297	1.74462	403.781	325.588	0.806347	0.11
JiLin@19	0.0483037	1.10958	0.117878	2.03945	0.0182151	1.52231	0.746429		45.9301	32.1159	113.146	2.18599	116.366	1.75579	333.119	357.228	1.07237	0.17
JiLin@20	0.0494958	1.52395	0.11977	2.39318	0.0181734	1.52348	0.636593		89.2891	43.1728	114.864	2.60245	116.101	1.75319	276.242	255.418	0.924616	0.22
Qinghu@01	0.0496152	0.40543	0.174359	1.5609	0.0254876	1.50733	0.965678		177.006	9.42755	163.195	2.35588	162.245	2.41549	2328.77	77.8519	0.0334304	0.03
Qinghu@02	0.0493856	0.796152	0.171047	1.70058	0.0251196	1.50271	0.883641		166.177	18.4985	160.327	2.52527	159.931	2.37416	838.259	385.063	0.45936	0.06
Qinghu@03	0.0494317	0.657877	0.16983	1.63811	0.0249176	1.50021	0.915813		168.359	15.2946	159.271	2.41759	158.661	2.35162	820.242	318.098	0.387809	0.07
Qinghu@04	0.0497034	0.662762	0.170773	1.64491	0.024919	1.50548	0.915236		181.146	15.3716	160.089	2.43915	158.669	2.36	761.22	331.345	0.435282	0.06
Qinghu@05	0.0488043	0.742175	0.167043	1.68133	0.0248238	1.50865	0.8973		138.442	17.3391	156.849	2.44651	158.07	2.35617	883.623	443.711	0.502149	0.1
Qinghu@06	0.0494361	0.597752	0.172686	1.66686	0.0253345	1.55599	0.933487		168.564	13.9022	161.747	2.49539	161.282	2.47888	925.266	377.835	0.408353	0.04
Qinghu@07	0.0499532	0.767761	0.170519	1.70158	0.0247577	1.51852	0.89242		192.815	17.7558	159.87	2.52009	157.654	2.36542	703.131	333.207	0.473891	0.02
Qinghu@08	0.049887	0.83915	0.170715	1.71984	0.0248188	1.50122	0.872886		189.734	19.4079	160.039	2.54966	158.039	2.3441	618.81	271.769	0.43918	0.01
Qinghu@09	0.0498512	0.921399	0.171281	1.76044	0.0249191	1.50006	0.852093		188.062	21.3042	160.53	2.61734	158.67	2.35152	377.409	179.654	0.47602	0.09
Qinghu@10	0.0493244	0.630817	0.169432	1.67582	0.0249134	1.55256	0.926448		163.279	14.682	158.926	2.46835	158.634	2.43329	737.15	349.957	0.474743	0.04
Qinghu@11	0.050052	1.0412	0.169815	1.86779	0.0246067	1.55065	0.830208		197.407	24.0131	159.258	2.7568	156.705	2.4011	587.61	220.414	0.375103	0.06
Qinghu@12	0.0498415	0.71602	0.171778	1.66688	0.0249963	1.50526	0.90304		187.606	16.581	160.961	2.48421	159.156	2.3668	764.018	348.125	0.45565	0.04

## Sheet: Table S5
Table S5 LA-ICP-MS U-Pb dating results for Jilin zircon
	Rediogenic isotopic ratios								Isotopic age (Ma)
Sample/	207Pb	±1s	207Pb	±1s	206Pb	±1s	Rho		207Pb	±1s	207Pb	±1s	206Pb	±1s
spot #	206Pb	abs	235U	abs	238U	abs			206Pb		235U		238U
LA-ICP-MS results (CUG-session 1)
JLZir1-01	0.0477702	0.00195811	0.120581	0.00484182	0.018413	0.000234169	0.316719		87.13	101.84	115.598	4.38798	117.618	1.48362
JLZir1-02	0.0492738	0.00214077	0.123806	0.00516129	0.0183657	0.000214734	0.280465		161.195	101.838	118.517	4.66403	117.319	1.36077
JLZir1-03	0.0488066	0.00285616	0.121643	0.00661938	0.0187324	0.000306342	0.300527		138.975	194.415	116.561	5.99281	119.64	1.93957
JLZir1-04	0.047364	0.00144263	0.122011	0.00361186	0.0187273	0.000175638	0.316818		77.87	61.105	116.893	3.26958	119.608	1.1133
JLZir1-05	0.0483685	0.00144464	0.123815	0.00375559	0.0185357	0.00017807	0.316722		116.755	65.735	118.525	3.39418	118.395	1.12883
JLZir1-06	0.0511611	0.00259982	0.126476	0.00572069	0.0184057	0.000236793	0.28443		255.62	116.65	120.926	5.15717	117.572	1.50022
JLZir1-07	0.0488872	0.00231756	0.123523	0.0058233	0.018552	0.00024289	0.277714		142.68	108.317	118.261	5.26341	118.498	1.53858
JLZir1-08	0.0506797	0.00297585	0.122708	0.00738439	0.0175289	0.000238953	0.226524		233.4	141.648	117.524	6.67897	112.02	1.51506
JLZir1-09	0.0474502	0.0019723	0.119228	0.00478324	0.0183062	0.000211703	0.288261		72.315	96.285	114.372	4.34014	116.942	1.34168
JLZir1-10	0.0479431	0.00225896	0.122221	0.00580036	0.0185402	0.000247762	0.281588		98.24	112.945	117.084	5.24875	118.423	1.56941
JLZir1-11	0.04804	0.00198837	0.120856	0.0048699	0.0183844	0.000231491	0.312487		101.94	102.231	115.847	4.41235	117.437	1.46672
JLZir1-12	0.0483502	0.002121	0.122649	0.00532144	0.0184945	0.000235054	0.292929		116.755	103.69	117.471	4.81365	118.134	1.48911
JLZir1-13	0.0491061	0.00185246	0.125075	0.00449255	0.0185627	0.00021438	0.321529		153.79	88.875	119.663	4.05535	118.566	1.35831
JLZir1-14	0.0499611	0.0018668	0.126744	0.00464335	0.0184391	0.000205597	0.304349		194.525	85.1725	121.168	4.18524	117.784	1.30292
JLZir1-15	0.0479455	0.00190114	0.12232	0.00453171	0.0187227	0.000217589	0.313692		98.24	88.88	117.173	4.10069	119.578	1.3784
JLZir1-16	0.0508996	0.00205025	0.128162	0.00499041	0.0184339	0.000202517	0.282143		235.25	94.43	122.445	4.4923	117.751	1.28346
JLZir1-17	0.0493234	0.0017185	0.124155	0.00432625	0.0182378	0.000188755	0.297017		164.9	81.47	118.832	3.90848	116.509	1.19665
JLZir1-18	0.0477616	0.00169411	0.122395	0.00407265	0.0187292	0.000200023	0.320958		87.13	80.356	117.241	3.68521	119.619	1.26737
JLZir1-19	0.0497167	0.00120775	0.124743	0.0030526	0.0181135	0.000141764	0.319822		188.97	57.3975	119.363	2.75699	115.722	0.899784
JLZir1-20	0.0486887	0.00183087	0.124244	0.00448058	0.0185921	0.0001915	0.285614		131.57	88.875	118.912	4.04754	118.752	1.21365
JLZir1-21	0.0501294	0.00296293	0.124537	0.00707697	0.018263	0.000266172	0.256473		211.185	137.02	119.177	6.39055	116.669	1.68625
JLZir1-22	0.0513729	0.00292856	0.124893	0.00667999	0.018098	0.000310188	0.320447		257.47	131.463	119.498	6.03023	115.624	1.96504
JLZir1-23	0.0480158	0.00141024	0.120599	0.00350569	0.0181662	0.000152812	0.289378		98.24	70.3625	115.615	3.1775	116.056	0.969542
JLZir1-24	0.0501851	0.00195631	0.124501	0.00464184	0.018154	0.000215184	0.317921		211.185	95.355	119.144	4.1922	115.979	1.36387
JLZir1-25	0.0493636	0.00238432	0.121821	0.00574073	0.0182022	0.000259914	0.303014		164.9	110.17	116.722	5.19666	116.284	1.64676
JLZir1-26	0.0471406	0.00119757	0.121375	0.0030485	0.0186248	0.000151057	0.322916		57.5	64.81	116.318	2.76149	118.959	0.958125
JLZir1-27	0.0494062	0.00228425	0.125064	0.00564647	0.0186292	0.000249631	0.296797		168.6	109.243	119.652	5.09665	118.987	1.5811
JLZir1-28	0.0491183	0.00271099	0.120276	0.00602536	0.0184013	0.000257517	0.279353		153.79	129.61	115.322	5.46176	117.544	1.6313
JLZir1-29	0.0482147	0.00165915	0.122308	0.00406982	0.0184711	0.000172049	0.279924		109.35	78.695	117.163	3.68294	117.986	1.09085
JLZir1-30	0.0454477	0.00173932	0.116794	0.00451965	0.0186958	0.000194984	0.269507		17.487	78.475	112.161	4.10995	119.408	1.23557
JLZir1-31	0.0504105	0.00246697	0.124413	0.0060219	0.0181011	0.000223246	0.254808		213.035	112.945	119.065	5.43859	115.643	1.41493
JLZir1-32	0.0490656	0.00215216	0.123685	0.00525632	0.0185037	0.000235438	0.2994		150.085	97.2075	118.407	4.7504	118.192	1.49152
JLZir1-33	0.049884	0.00226419	0.123493	0.00548118	0.0181752	0.000225756	0.279851		190.82	110.17	118.233	4.95439	116.113	1.43071
JLZir1-34	0.0482063	0.00215769	0.122373	0.0057125	0.0184134	0.000225895	0.262804		109.35	103.786	117.221	5.16857	117.621	1.43129
JLZir1-35	0.0510727	0.00179201	0.127097	0.00427632	0.0181465	0.00017976	0.294419		242.66	81.4675	121.486	3.85335	115.931	1.13988
JLZir1-36	0.0490237	0.00224607	0.12047	0.00546998	0.0180324	0.000220305	0.269069		150.085	107.392	115.498	4.95758	115.209	1.39641
JLZir1-37	0.0493325	0.00222473	0.124987	0.00555866	0.0185477	0.000241711	0.293023		164.9	105.54	119.583	5.01776	118.471	1.53113
JLZir1-38	0.0521827	0.00317116	0.127205	0.007408	0.0179147	0.000280546	0.268904		294.505	138.87	121.583	6.67362	114.463	1.77776
JLZir1-39	0.0512203	0.00246653	0.125862	0.00612984	0.0180115	0.000276199	0.314861		250.065	83.3225	120.373	5.52893	115.076	1.75009
JLZir1-40	0.0527772	0.00281544	0.12943	0.00643474	0.0183204	0.000271575	0.298166		320.43	120.353	123.585	5.78558	117.032	1.72035
JLZir1-41	0.0489041	0.00106714	0.125101	0.00292842	0.0184905	0.000143218	0.330884		142.68	47.2175	119.686	2.6441	118.109	0.908721
JLZir1-42	0.0492834	0.00221538	0.125129	0.00549544	0.0186619	0.000236327	0.288344		161.195	105.54	119.711	4.96008	119.194	1.49694
JLZir1-43	0.0472304	0.00155501	0.120874	0.00398639	0.0185451	0.000168732	0.27588		61.205	138.87	115.864	3.61208	118.454	1.06983
JLZir1-44	0.0483289	0.00176308	0.123811	0.0044559	0.0186462	0.000197316	0.294032		122.31	82.4	118.521	4.02679	119.094	1.25035
JLZir1-45	0.0508939	0.00258698	0.123476	0.00606377	0.0180364	0.000255357	0.288296		235.25	113.873	118.218	5.48095	115.234	1.61817
JLZir1-46	0.0474618	0.00179708	0.120009	0.00434303	0.0185426	0.000208459	0.310651		72.315	94.435	115.08	3.9381	118.438	1.3209
LA-ICP-MS results (CUG-session 2)
JLZir1-01	0.048258	0.0015867	0.12177	0.003704	0.0182996	0.000228418	0.410352		122.31	177.759	116.675	3.36007	116.901	1.448
JLZir1-02	0.0489965	0.00187084	0.124124	0.00446721	0.0183744	0.000234352	0.354384		146.38	90.529	118.804	4.04142	117.374	1.48542
JLZir1-03	0.0487608	0.00175131	0.124239	0.00416812	0.018487	0.000237054	0.382204		200.075	87.368	118.907	3.77134	118.087	1.50236
JLZir1-04	0.0489956	0.00181854	0.124765	0.00433805	0.0184697	0.000239876	0.373529		146.38	86.9255	119.382	3.92278	117.977	1.52022
JLZir1-05	0.0485495	0.00204517	0.122261	0.00490363	0.0182648	0.000235257	0.321141		127.865	101.445	117.12	4.44224	116.68	1.49128
JLZir1-06	0.0497085	0.00233392	0.12527	0.00564284	0.0182835	0.000242145	0.294012		188.97	112.883	119.838	5.09691	116.798	1.53481
JLZir1-07	0.0489429	0.00198396	0.123863	0.00476922	0.0183561	0.000232655	0.329175		146.38	80.7166	118.569	4.31478	117.258	1.47471
JLZir1-08	0.0488308	0.0018798	0.124994	0.0045386	0.0185705	0.000237461	0.352157		138.975	87.1989	119.589	4.10271	118.615	1.50483
JLZir1-09	0.0487549	0.00170024	0.123548	0.00402739	0.0183787	0.00022773	0.380119		200.075	79.5542	118.284	3.64663	117.401	1.44356
JLZir1-10	0.0478109	0.00181014	0.121384	0.0043476	0.0184119	0.000225924	0.342592		100.09	89.7324	116.326	3.94286	117.611	1.4321
JLZir1-11	0.0485601	0.00169717	0.125065	0.00409391	0.0186785	0.000228731	0.374093		127.865	84.5497	119.654	3.70182	119.299	1.44952
JLZir1-12	0.0489432	0.00168869	0.123194	0.00396218	0.0182573	0.000228073	0.388414		146.38	84.4044	117.963	3.5889	116.632	1.44587
JLZir1-13	0.0487526	0.00187773	0.123609	0.00449994	0.0183895	0.000231258	0.34544		200.075	89.5944	118.339	4.07274	117.469	1.46584
JLZir1-14	0.0486481	0.00162321	0.124587	0.00385574	0.018574	0.000231637	0.402968		131.57	94.4401	119.222	3.48871	118.637	1.46801
JLZir1-15	0.0493315	0.00250553	0.125925	0.00620091	0.0185152	0.000230304	0.252598		164.9	129.7	120.429	5.59681	118.265	1.45966
JLZir1-16	0.0487746	0.00172381	0.124609	0.00410902	0.0185318	0.000235671	0.385658		200.075	82.8681	119.242	3.71687	118.37	1.49356
JLZir1-17	0.0487561	0.00169726	0.125174	0.00407003	0.0186179	0.000231491	0.3824		200.075	80.8221	119.752	3.67996	118.915	1.46704
JLZir1-18	0.0489611	0.00187565	0.125029	0.00452761	0.018521	0.000231499	0.345164		146.38	80.0057	119.621	4.09269	118.302	1.46721
JLZir1-19	0.048619	0.00170492	0.123533	0.00404408	0.0184272	0.000231611	0.383939		127.865	100.318	118.27	3.66174	117.708	1.46803
JLZir1-20	0.048214	0.00170482	0.123552	0.00406901	0.0185867	0.000239231	0.390818		109.35	181.605	118.287	3.68416	118.718	1.51599
JLZir1-21	0.0489439	0.0018162	0.124294	0.00433768	0.0184197	0.00023233	0.361423		146.38	75.2751	118.958	3.92403	117.661	1.47258
JLZir1-22	0.0485426	0.00175909	0.124632	0.00425154	0.0186216	0.000227694	0.35844		124.16	82.276	119.263	3.84525	118.939	1.44304
JLZir1-23	0.048141	0.00199753	0.123353	0.00485818	0.0185863	0.000242743	0.331611		105.645	100.015	118.107	4.397	118.715	1.53819
JLZir1-24	0.0483375	0.00184686	0.12309	0.00444502	0.0184687	0.000230477	0.345571		122.31	89.0848	117.869	4.025	117.971	1.46081
JLZir1-25	0.0487043	0.00162547	0.125005	0.00386437	0.0186168	0.00023414	0.406836		200.075	88.3139	119.599	3.49525	118.908	1.48378
JLZir1-26	0.0482329	0.00187877	0.120995	0.00442831	0.0181937	0.000242582	0.364309		109.35	88.6136	115.974	4.01718	116.23	1.53769
JLZir1-27	0.0482777	0.00197106	0.121772	0.00470872	0.0182923	0.000239655	0.338815		122.31	95.4143	116.677	4.26793	116.854	1.51905
JLZir1-28	0.0477337	0.0024318	0.120221	0.00584529	0.0182655	0.000277847	0.312857		87.13	119.097	115.272	5.30279	116.685	1.76061
JLZir1-29	0.0487609	0.00179802	0.122573	0.00424309	0.0182313	0.000231609	0.366989		200.075	86.1504	117.402	3.84443	116.468	1.46825
JLZir1-30	0.0490551	0.00183867	0.123896	0.00436902	0.0183228	0.000232746	0.360215		150.085	101.65	118.598	3.95364	117.047	1.47533
JLZir1-31	0.0490518	0.00184546	0.123964	0.00438812	0.0183341	0.000233661	0.360033		150.085	101.851	118.659	3.97064	117.119	1.4811
JLZir1-32	0.0487459	0.0019398	0.121561	0.00448238	0.0180842	0.000270614	0.405824		200.075	96.0085	116.487	4.06409	115.537	1.71514
JLZir1-33	0.0495212	0.00190538	0.123137	0.00448911	0.0180357	0.000221876	0.337447		172.305	102.184	117.912	4.06463	115.229	1.40695
JLZir1-34	0.0487965	0.00166197	0.125151	0.00396744	0.0186035	0.000231654	0.392796		200.075	82.2443	119.731	3.58764	118.824	1.46808
JLZir1-35	0.0488076	0.00180046	0.125238	0.00434519	0.0186148	0.000233255	0.361162		138.975	84.6204	119.81	3.92761	118.895	1.47819
JLZir1-36	0.0487103	0.00200242	0.125031	0.00486148	0.0186228	0.000248525	0.343222		200.075	96.3401	119.623	4.39358	118.946	1.5747
JLZir1-37	0.04905	0.00182979	0.124066	0.00428866	0.0183584	0.000257486	0.405743		150.085	83.6329	118.752	3.88059	117.273	1.63171
JLZir1-38	0.04888	0.00218539	0.125034	0.00528934	0.018572	0.000268713	0.342024		142.68	105.399	119.625	4.77925	118.624	1.70239
JLZir1-39	0.0488925	0.00210572	0.123792	0.00500334	0.0183765	0.00027339	0.368089		142.68	82.832	118.504	4.52631	117.388	1.73226
JLZir1-40	0.0486653	0.00247163	0.124218	0.00600604	0.018525	0.000287988	0.321524		131.57	120.984	118.889	5.42932	118.327	1.82434
JLZir1-41	0.0479152	0.00243716	0.122806	0.00590825	0.0186153	0.000307307	0.343132		94.535	121.836	117.612	5.34768	118.899	1.94635
JLZir1-42	0.0491835	0.00271971	0.124895	0.00656227	0.0184295	0.000317659	0.328048		166.75	133.26	119.5	5.92778	117.723	2.01215
JLZir1-43	0.0486464	0.00209154	0.123967	0.00493425	0.0184955	0.000300675	0.408431		131.57	117.291	118.663	4.46329	118.14	1.90462
JLZir1-44	0.0477005	0.00319368	0.12153	0.00790103	0.0184952	0.000295913	0.246097		83.425	254.701	116.458	7.15667	118.138	1.8745
JLZir1-45	0.0492654	0.00224548	0.126573	0.00547571	0.0186469	0.000267583	0.331706		161.195	104.155	121.014	4.94065	119.098	1.69513
JLZir1-46	0.0486005	0.00170035	0.124562	0.00401301	0.0185951	0.000253669	0.423432		127.865	80.6638	119.199	3.6305	118.771	1.60725
JLZir1-47	0.0491523	0.00209325	0.125264	0.00500699	0.0184964	0.000271806	0.367639		153.79	97.6699	119.833	4.52382	118.146	1.72205
JLZir1-48	0.0489401	0.00206025	0.124101	0.00494273	0.0183942	0.000250801	0.342341		146.38	85.4108	118.783	4.47041	117.499	1.58939
JLZir1-49	0.0490708	0.00213457	0.123416	0.00513005	0.0182441	0.000233936	0.30848		150.085	99.6304	118.165	4.64217	116.549	1.48295
JLZir1-50	0.0495696	0.00222804	0.124897	0.00534464	0.0182828	0.000251413	0.321349		176.01	106.394	119.502	4.82968	116.794	1.59341
JLZir1-51	0.0482784	0.00164565	0.120536	0.00380711	0.0181086	0.000232121	0.405837		122.31	81.5677	115.558	3.45685	115.691	1.47164
JLZir1-52	0.0489074	0.00174174	0.12292	0.00408715	0.018234	0.000232578	0.383609		142.68	74.8305	117.716	3.70253	116.485	1.47438
JLZir1-53	0.0476601	0.00234464	0.121166	0.00573931	0.0184435	0.000245029	0.280477		83.425	114.726	116.129	5.2025	117.811	1.55283
JLZir1-54	0.0489432	0.00216384	0.124014	0.00522218	0.0183848	0.000247615	0.319842		146.38	117.235	118.704	4.72289	117.44	1.56926
JLZir1-55	0.0483342	0.00177527	0.121054	0.00417027	0.0181683	0.000231416	0.369737		122.31	84.1919	116.027	3.78364	116.069	1.46711
JLZir1-56	0.0495213	0.0019156	0.123887	0.00449496	0.0181447	0.000243364	0.369663		172.305	109.997	118.59	4.06728	115.92	1.54269
JLZir1-57	0.0483647	0.0019594	0.124232	0.00477955	0.0186352	0.000236567	0.329966		116.755	97.5601	118.902	4.32273	119.024	1.4991
JLZir1-58	0.0482925	0.00163237	0.12191	0.00380506	0.0183089	0.000237565	0.415718		122.31	163.512	116.802	3.45094	116.959	1.50582
JLZir1-59	0.0495415	0.00275686	0.125116	0.00670947	0.0183249	0.000272357	0.277155		172.305	129.253	119.7	6.05938	117.06	1.7258
JLZir1-60	0.049569	0.0024862	0.12522	0.00605527	0.0183199	0.000243911	0.275327		176.01	20.0693	119.793	5.46895	117.029	1.54592
JLZir1-61	0.0488479	0.00180264	0.125879	0.00433445	0.0186929	0.000248118	0.385479		138.975	68.9805	120.388	3.91577	119.39	1.57203
JLZir1-62	0.0489749	0.00256659	0.124358	0.00631429	0.0184134	0.000238868	0.255489		146.38	125.383	119.015	5.7068	117.62	1.51392
JLZir1-63	0.0481963	0.00208602	0.123958	0.00508936	0.0186506	0.000255472	0.333629		109.35	100.018	118.654	4.60327	119.122	1.61857
JLZir1-64	0.0487597	0.00201448	0.123429	0.00480636	0.0183618	0.000253456	0.354477		200.075	98.5879	118.176	4.34993	117.294	1.60622
LA-ICP-MS results (CUG-session 3)
JLZir1-01	0.0472527	0.0014263	0.119351	0.00359557	0.018409	0.00024883	0.448671		61.205	70.365	114.483	3.26254	117.593	1.57634
JLZir1-02	0.047532	0.00122461	0.121544	0.00304506	0.0186922	0.000251193	0.536396		76.02	93.5075	116.471	2.75796	119.385	1.59089
JLZir1-03	0.0484777	0.000843732	0.126584	0.00234755	0.0189169	0.000239131	0.681632		124.16	42.59	121.024	2.11743	120.807	1.51433
JLZir1-04	0.0484658	0.000936958	0.124774	0.00240936	0.0187	0.000227905	0.631155		120.46	46.29	119.391	2.17655	119.434	1.44364
JLZir1-05	0.0484258	0.00122768	0.12308	0.00311384	0.0184738	0.000238822	0.51099		120.46	65.735	117.861	2.81638	118.003	1.51296
JLZir1-06	0.0496324	0.00127755	0.125224	0.0031566	0.0183646	0.000233776	0.504996		176.01	59.2475	119.797	2.84963	117.312	1.4812
JLZir1-07	0.0501902	0.00135637	0.128925	0.00348324	0.0187036	0.000265363	0.525133		211.185	62.9525	123.131	3.13404	119.457	1.68047
JLZir1-08	0.0499571	0.00122115	0.12747	0.00295254	0.0186714	0.000241703	0.55888		194.525	27.7725	121.822	2.66031	119.254	1.53092
JLZir1-09	0.0500954	0.00177874	0.124454	0.0042654	0.0183543	0.000296633	0.471556		198.23	78.69	119.102	3.85251	117.246	1.87882
JLZir1-10	0.0477221	0.00194729	0.120735	0.00508188	0.0183655	0.000277403	0.358856		87.13	101.84	115.738	4.60484	117.317	1.75715
JLZir1-11	0.0498894	0.00168946	0.126203	0.0041227	0.0185648	0.000265315	0.437481		190.82	112.02	120.68	3.71792	118.579	1.68037
JLZir1-12	0.049917	0.00165326	0.12533	0.00405503	0.018352	0.000263974	0.444572		190.82	71.285	119.893	3.65975	117.232	1.67222
JLZir1-13	0.0493217	0.00153076	0.125424	0.00382673	0.0185188	0.000260767	0.461522		164.9	74.06	119.978	3.45353	118.288	1.65168
JLZir1-14	0.0486208	0.00150466	0.122483	0.00360244	0.018477	0.000259603	0.477702		127.865	78.6925	117.321	3.25969	118.023	1.64438
JLZir1-15	0.0481279	0.00162601	0.119184	0.00392203	0.0180963	0.000255008	0.428223		105.645	74.9925	114.332	3.55913	115.613	1.61587
JLZir1-16	0.0503913	0.00210585	0.125344	0.00485337	0.0183462	0.000286935	0.403923		213.035	91.6525	119.905	4.37989	117.195	1.81748
JLZir1-17	0.0475769	0.00141824	0.117661	0.00338172	0.0181079	0.000261981	0.503381		79.72	70.3625	112.95	3.07321	115.687	1.65998
JLZir1-18	0.0487079	0.00176445	0.12522	0.00453635	0.0187364	0.000289453	0.426443		200.075	80.545	119.794	4.09435	119.665	1.83276
JLZir1-19	0.0484007	0.00163916	0.12187	0.00406239	0.018406	0.000265287	0.432385		120.46	81.475	116.766	3.67765	117.574	1.68044
JLZir1-20	0.0494439	0.00163936	0.124214	0.00398909	0.0184396	0.000256752	0.43357		168.6	77.765	118.885	3.60383	117.787	1.6264
JLZir1-21	0.0469377	0.00133951	0.118821	0.00339262	0.0183978	0.000242793	0.462199		55.65	66.66	114.003	3.07994	117.522	1.53818
JLZir1-22	0.0464076	0.00142778	0.117231	0.00358173	0.018406	0.000247826	0.440693		20.47	79.62	112.558	3.25611	117.574	1.57
JLZir1-23	0.0472603	0.0013809	0.121138	0.00370404	0.0186357	0.00024185	0.42443		61.205	70.365	116.103	3.35557	119.028	1.53189
JLZir1-24	0.0485104	0.00136285	0.12475	0.00339769	0.0187594	0.000250484	0.490249		124.16	66.66	119.369	3.06839	119.81	1.58631
JLZir1-25	0.0469006	0.00109235	0.120127	0.00286971	0.0185726	0.000229339	0.516899		42.69	55.55	115.187	2.60254	118.628	1.45287
JLZir1-26	0.0479854	0.00125122	0.123145	0.00314297	0.0187066	0.000242893	0.508744		98.24	65.735	117.919	2.84254	119.476	1.53839
JLZir1-27	0.0485485	0.00148212	0.122052	0.00370339	0.0183301	0.000248667	0.447095		127.865	72.215	116.931	3.35226	117.093	1.57543
JLZir1-28	0.0494096	0.00182283	0.12289	0.00446086	0.0182728	0.0002764	0.416709		168.6	85.1725	117.689	4.03457	116.73	1.75095
JLZir1-29	0.047821	0.00144049	0.120176	0.0035331	0.0183772	0.000255454	0.472822		100.09	74.9925	115.232	3.20353	117.391	1.61829
JLZir1-30	0.0472934	0.00196437	0.121567	0.00508391	0.0187982	0.000282788	0.359719		64.91	101.84	116.492	4.60328	120.056	1.79051
JLZir1-31	0.0475408	0.00112656	0.123335	0.00294959	0.0188448	0.000237204	0.526327		76.02	55.55	118.091	2.66734	120.351	1.50224
JLZir1-32	0.0498026	0.00113656	0.128723	0.00274914	0.0188531	0.000236052	0.586251		187.12	53.6925	122.949	2.4745	120.404	1.49495
JLZir1-33	0.0482817	0.000964724	0.125328	0.00248867	0.018873	0.000231724	0.618317		122.31	50.92	119.891	2.247	120.53	1.46757
JLZir1-34	0.0480242	0.00103277	0.123913	0.00262682	0.0187891	0.000233956	0.587375		101.94	47.2175	118.613	2.37453	119.998	1.48178
JLZir1-35	0.0481278	0.00183472	0.125206	0.00483303	0.0189277	0.000272117	0.372448		105.645	90.7325	119.781	4.36207	120.875	1.72283
JLZir1-36	0.0481386	0.00180515	0.12265	0.0045112	0.0186378	0.000261909	0.382057		105.645	87.0275	117.471	4.08095	119.041	1.65873
JLZir1-37	0.0474216	0.00141253	0.121178	0.00356528	0.0186778	0.000255656	0.465221		77.87	61.105	116.139	3.22982	119.294	1.61913
JLZir1-38	0.0487543	0.0018616	0.122031	0.00443371	0.0185361	0.000286793	0.425848		200.075	95.355	116.912	4.01307	118.397	1.81626
JLZir1-39	0.0500749	0.00196496	0.126478	0.0049038	0.0185039	0.000294779	0.410879		198.23	90.7275	120.928	4.42095	118.193	1.86683
JLZir1-40	0.047147	0.00178424	0.118315	0.0045892	0.0183233	0.000268874	0.378311		57.5	88.88	113.544	4.16752	117.05	1.70326
JLZir1-41	0.049591	0.00125189	0.126478	0.00304432	0.0186166	0.000246673	0.550484		176.01	56.47	120.928	2.74532	118.907	1.56242
JLZir1-42	0.0494504	0.00155659	0.125305	0.00384411	0.0184465	0.000263407	0.465463		168.6	74.0625	119.87	3.46957	117.831	1.66849
JLZir1-43	0.048168	0.0017525	0.124022	0.00451192	0.0189077	0.000276007	0.401253		109.35	85.175	118.712	4.07663	120.749	1.74745
JLZir1-44	0.0490227	0.00174512	0.12161	0.00417398	0.0181142	0.000246919	0.397149		150.085	83.32	116.53	3.7795	115.726	1.56467
JLZir1-45	0.049095	0.00250105	0.122725	0.00562829	0.018511	0.000301172	0.354765		153.79	152.757	117.539	5.09081	118.238	1.90727
JLZir1-46	0.0496262	0.00124128	0.128229	0.00330734	0.0187425	0.000249729	0.516595		176.01	59.2475	122.505	2.9777	119.704	1.58156
JLZir1-47	0.0496901	0.00109543	0.125508	0.00262684	0.018415	0.000228851	0.593771		188.97	51.8425	120.053	2.37122	117.631	1.44999
JLZir1-48	0.0487427	0.00143639	0.123926	0.00347207	0.0185227	0.00024598	0.47399		200.075	73.1375	118.625	3.13779	118.313	1.55817
JLZir1-49	0.0485431	0.00115157	0.123341	0.00280166	0.018538	0.000239366	0.568453		124.16	55.55	118.097	2.53368	118.409	1.51632
JLZir1-50	0.049966	0.00176836	0.122811	0.00417776	0.0180836	0.000264721	0.430327		194.525	81.4675	117.617	3.77889	115.533	1.67735
JLZir1-51	0.0495918	0.00163755	0.121917	0.00384733	0.0179494	0.000255472	0.451023		176.01	75.9125	116.809	3.48291	114.683	1.61903
JLZir1-52	0.0488331	0.0017325	0.124478	0.00435016	0.018594	0.00026944	0.414647		138.975	83.32	119.124	3.92894	118.764	1.70642
JLZir1-53	0.0502863	0.00197741	0.124113	0.00447212	0.0181691	0.000275392	0.42065		209.33	87.95	118.794	4.04036	116.074	1.74474
JLZir1-54	0.0489845	0.00115563	0.126057	0.00309679	0.0186368	0.000242037	0.528648		146.38	55.5475	120.549	2.79363	119.035	1.53307
JLZir1-55	0.0504891	0.00130838	0.127166	0.00321724	0.0183516	0.000231272	0.498122		216.74	54.62	121.548	2.89936	117.23	1.46538
JLZir1-56	0.0498436	0.00138483	0.125614	0.00338492	0.0184224	0.000247986	0.499542		187.12	64.8025	120.149	3.05453	117.678	1.57099
JLZir1-57	0.0502274	0.00134461	0.125455	0.00339231	0.0181832	0.000247776	0.503941		205.63	61.1	120.005	3.06163	116.163	1.56999
JLZir1-58	0.0482104	0.00209402	0.124546	0.00517164	0.0190673	0.00028852	0.364406		109.35	95.36	119.185	4.67032	121.759	1.8263
JLZir1-59	0.0498588	0.00204619	0.124299	0.00500251	0.0183756	0.000303393	0.410247		187.12	89.8	118.962	4.51862	117.381	1.92155
JLZir1-60	0.0485587	0.0011028	0.125338	0.00274571	0.0187704	0.000235883	0.573656		127.865	58.3275	119.9	2.47877	119.88	1.49399
JLZir1-61	0.0494464	0.00217394	0.123445	0.00525022	0.01831	0.000279713	0.359185		168.6	136.093	118.19	4.7459	116.967	1.77185
JLZir1-62	0.0475764	0.0013255	0.123253	0.00323717	0.0189076	0.00028104	0.565931		79.72	66.66	118.017	2.92739	120.748	1.77927
JLZir1-63	0.0509953	0.00177233	0.127797	0.00427506	0.0184151	0.000271329	0.440457		238.955	76.84	122.117	3.84984	117.631	1.71865
JLZir1-64	0.0486972	0.00160461	0.125066	0.0039231	0.0187788	0.000263374	0.447109		131.57	77.765	119.654	3.54157	119.933	1.66778
JLZir1-65	0.0480771	0.00156483	0.121805	0.00393249	0.0185027	0.000253524	0.424407		101.94	77.77	116.707	3.56031	118.186	1.6059
JLZir1-66	0.0490423	0.00199606	0.123903	0.00505978	0.0185342	0.000294008	0.388451		150.085	96.2825	118.605	4.57194	118.385	1.86191
JLZir1-67	0.0493593	0.00147023	0.125295	0.0035719	0.0186068	0.000253062	0.477076		164.9	65.73	119.861	3.22405	118.845	1.60283
JLZir1-68	0.0485133	0.00100891	0.125121	0.00257987	0.0187635	0.000239696	0.619552		124.16	48.1425	119.704	2.32967	119.837	1.5181
JLZir1-69	0.0492184	0.00165403	0.124814	0.00392134	0.0186329	0.000258995	0.442428		166.75	79.615	119.427	3.54077	119.01	1.64031
JLZir1-70	0.0476305	0.00133636	0.122028	0.00359588	0.0185294	0.000247199	0.452733		79.72	66.66	116.909	3.25507	118.355	1.56586
JLZir1-71	0.0462625	0.00140131	0.118593	0.00361188	0.0187087	0.000265706	0.466319		13.06	70.365	113.796	3.27954	119.49	1.68263
JLZir1-72	0.0483767	0.00126374	0.124407	0.00325646	0.0187513	0.000253961	0.517409		116.755	67.585	119.059	2.94183	119.759	1.60831
JLZir1-73	0.0475691	0.00170281	0.119794	0.00419627	0.0185397	0.00028689	0.441758		79.72	81.475	114.885	3.80581	118.42	1.81688
JLZir1-74	0.0471868	0.0013788	0.122467	0.00356068	0.0188955	0.000255827	0.465662		57.5	70.365	117.306	3.22198	120.672	1.61989
JLZir1-75	0.0498323	0.000876286	0.128311	0.00225128	0.0186938	0.00023632	0.720505		187.12	40.7325	122.579	2.02767	119.395	1.49685
JLZir1-76	0.0485334	0.0019615	0.123455	0.00504906	0.0187794	0.000315081	0.410241		124.16	91.655	118.2	4.56407	119.937	1.99475
JLZir1-77	0.0496406	0.00208719	0.125369	0.00517121	0.0186046	0.000291064	0.379284		188.97	98.1325	119.928	4.66653	118.831	1.84317
JLZir1-78	0.0470643	0.00179982	0.119589	0.00443644	0.0186827	0.00028457	0.410587		53.8	88.88	114.7	4.02427	119.325	1.80196
JLZir1-79	0.0473427	0.0018754	0.117836	0.00453336	0.0183097	0.000277155	0.393457		64.91	101.84	113.108	4.11859	116.964	1.75567
JLZir1-80	0.0498327	0.00153287	0.125179	0.00394708	0.0182248	0.000256604	0.446536		187.12	67.58	119.756	3.56285	116.427	1.62578
JLZir1-81	0.0495245	0.00200593	0.12387	0.00504145	0.0183105	0.000287119	0.385276		172.305	94.43	118.574	4.55552	116.969	1.8187
JLZir1-82	0.0478941	0.00129118	0.12255	0.00334706	0.0186048	0.000285937	0.425662		94.535	58.3275	117.381	3.02542	118.832	1.81031
JLZir1-83	0.0478976	0.00154896	0.12147	0.00394197	0.0183414	0.000267068	0.336325		94.535	75.9175	116.404	3.57473	117.165	1.69206
JLZir1-84	0.0482107	0.0017275	0.120581	0.00415645	0.0181762	0.000254699	0.268014		109.35	75.9125	115.599	3.75077	116.119	1.61456
JLZir1-85	0.0484754	0.00142632	0.121858	0.00342347	0.0183104	0.000263779	0.476039		124.16	65.735	116.755	3.11967	116.969	1.67246
JLZir1-86	0.0495293	0.00191467	0.123804	0.00459527	0.0182447	0.000272162	0.297624		172.305	87.95	118.514	4.15928	116.553	1.72454
JLZir1-87	0.0466248	0.00184574	0.118068	0.00443285	0.0184447	0.000270483	0.276556		31.58	88.88	113.319	4.03377	117.819	1.71377
JLZir1-88	0.0495673	0.00147158	0.124251	0.00362297	0.0181901	0.000254751	0.314099		176.01	72.215	118.918	3.29144	116.207	1.6146
JLZir1-89	0.0477964	0.00147336	0.122414	0.00387347	0.018599	0.00026583	0.451694		100.09	74.0675	117.258	3.50502	118.795	1.68358
JLZir1-90	0.0492934	0.00116319	0.125197	0.00305413	0.0183736	0.000232806	0.519405		161.195	55.5475	119.772	2.75726	117.369	1.47505
JLZir1-91	0.0477092	0.00203787	0.121037	0.00499197	0.0185079	0.00025897	0.339266		83.425	99.99	116.012	4.52218	118.219	1.64034
JLZir1-92	0.0498343	0.00215235	0.124974	0.00520309	0.0183411	0.000284384	0.372425		187.12	99.985	119.572	4.69692	117.163	1.80135
JLZir1-93	0.0480028	0.00243674	0.121553	0.00577298	0.0186403	0.000296356	0.334755		98.24	118.5	116.479	5.22709	119.057	1.87657
JLZir1-94	0.0476333	0.00163824	0.122241	0.00413982	0.0186819	0.000257573	0.407111		79.72	81.475	117.101	3.74648	119.32	1.63124
JLZir1-95	0.0485816	0.00153367	0.121629	0.0037246	0.0182234	0.000240115	0.430275		127.865	80.545	116.548	3.37272	116.418	1.52148
JLZir1-96	0.0502064	0.00210229	0.124498	0.00511611	0.018323	0.000311075	0.413136		211.185	96.2825	119.142	4.62038	117.048	1.97025
JLZir1-97	0.0483963	0.00245109	0.123097	0.00602567	0.0186741	0.000322632	0.352947		120.46	114.79	117.876	5.44835	119.271	2.04271
JLZir1-98	0.0487067	0.00262039	0.121391	0.00639389	0.0182848	0.000316884	0.329026		200.075	73.14	116.332	5.79	116.807	2.00708
Plešovice-01	0.0522673	0.000912395	0.393721	0.00677653	0.0544433	0.000668414	0.713316		298.21	43.515	337.084	4.9423	341.744	4.09056
Plešovice-02	0.053403	0.000899894	0.395622	0.00662165	0.0535495	0.000641015	0.715198		346.35	38.885	338.468	4.82307	336.277	3.92641
Plešovice-03	0.0534425	0.00088227	0.399425	0.00642334	0.0541023	0.000660298	0.758924		346.35	37.0325	341.231	4.66637	339.658	4.04225
Plešovice-04	0.0520548	0.000956101	0.387579	0.00717842	0.0539998	0.000637091	0.637002		287.1	36.1075	332.599	5.25779	339.032	3.90084
Plešovice-05	0.0523226	0.000975813	0.386121	0.00710975	0.0535269	0.000618672	0.627708		298.21	42.59	331.532	5.21303	336.138	3.78994
Plešovice-06	0.054441	0.0008975	0.40007	0.00671793	0.0532362	0.000599173	0.670263		390.79	41.6625	341.699	4.87763	334.36	3.67172
Plešovice-07	0.0536983	0.000962422	0.392587	0.00709177	0.0530339	0.000611236	0.638023		366.72	40.7375	336.257	5.17591	333.121	3.74616
Plešovice-08	0.053301	0.000960527	0.398202	0.00749029	0.0541367	0.000631933	0.620561		342.65	43.515	340.343	5.44442	339.869	3.86885
Plešovice-09	0.0526795	0.000917568	0.387031	0.00662202	0.0532775	0.000611295	0.670598		322.28	38.885	332.198	4.85294	334.612	3.74569
Plešovice-10	0.0527075	0.000962538	0.390065	0.0072056	0.0536191	0.000626321	0.632331		316.725	45.365	334.417	5.26829	336.703	3.83637
Plešovice-11	0.0533072	0.000974712	0.397348	0.00725592	0.0540284	0.000610002	0.618284		342.65	42.5875	339.723	5.27757	339.207	3.73525
Plešovice-12	0.0521111	0.00107118	0.389287	0.00800681	0.0541715	0.000634628	0.569587		300.06	50.92	333.849	5.8563	340.081	3.88519
Plešovice-13	0.0527894	0.000890718	0.395948	0.00678979	0.0543399	0.000632004	0.67824		320.43	43.515	338.705	4.94412	341.111	3.86857
Plešovice-14	0.0536777	0.000844692	0.399909	0.00627282	0.0540007	0.000599065	0.70725		366.72	37.0325	341.582	4.55573	339.037	3.66853
Plešovice-15	0.0527163	0.000915942	0.392727	0.00676096	0.0540294	0.000612875	0.658908		316.725	45.365	336.36	4.93445	339.213	3.7528
Plešovice-16	0.0537416	0.000869542	0.399176	0.00631577	0.0538822	0.000600087	0.703895		361.165	35.1825	341.051	4.58922	338.312	3.67517
Plešovice-17	0.0531974	0.000860736	0.397007	0.00654274	0.0540367	0.000619813	0.696002		344.5	35.1825	339.475	4.76104	339.257	3.79515
Plešovice-18	0.0542181	0.000914753	0.400567	0.00678754	0.0536537	0.000625064	0.687523		388.94	37.0325	342.06	4.92633	336.915	3.82856
Plešovice-19	0.0536461	0.000869872	0.397832	0.00652435	0.0537219	0.00060412	0.685699		366.72	35.18	340.074	4.74492	337.332	3.70034
Plešovice-20	0.0536153	0.000932737	0.400651	0.00700213	0.0541209	0.000621335	0.656896		353.76	36.1075	342.12	5.08143	339.772	3.80416
Plešovice-21	0.0539476	0.00134345	0.406583	0.0104729	0.0546629	0.00084205	0.598036		368.57	55.55	346.411	7.56384	343.086	5.15019
Plešovice-22	0.0508489	0.0012775	0.377775	0.00977722	0.0539942	0.000860717	0.615931		235.25	62.025	325.4	7.20894	338.997	5.26748
Plešovice-23	0.0514007	0.00132969	0.383277	0.0106397	0.0538959	0.000780996	0.522006		257.47	59.2475	329.446	7.8132	338.396	4.78065
Plešovice-24	0.0535859	0.00129371	0.40444	0.009798	0.0545597	0.00080986	0.612709		353.76	53.6975	344.863	7.08764	342.455	4.95404
Plešovice-25	0.05208	0.00107431	0.389017	0.00827945	0.0541917	0.000828975	0.718747		287.1	50.92	333.651	6.0566	340.205	5.07253
Plešovice-26	0.0524076	0.00116271	0.391693	0.008782	0.0541084	0.000762241	0.628318		301.91	51.8475	335.605	6.41144	339.696	4.6651
Plešovice-27	0.051948	0.0011385	0.386363	0.00845549	0.0538194	0.000765294	0.649751		283.395	49.995	331.71	6.19697	337.928	4.685
Plešovice-28	0.0534396	0.00135169	0.399173	0.0102502	0.054262	0.000709941	0.50951		346.35	83.325	341.048	7.44224	340.635	4.34492
Plešovice-29	0.0539518	0.00130241	0.399242	0.00959411	0.0537486	0.000684469	0.529929		368.57	55.55	341.098	6.96599	337.495	4.19127
Plešovice-30	0.053298	0.00140116	0.397495	0.0102893	0.0541487	0.000729379	0.520367		342.65	59.255	339.83	7.47951	339.942	4.46413
Plešovice-31	0.054207	0.00123531	0.402795	0.00902482	0.0539558	0.000683135	0.565086		388.94	51.8475	343.673	6.5366	338.762	4.18233
Plešovice-32	0.0529347	0.0013446	0.388156	0.00933595	0.053388	0.000688472	0.536154		327.835	24.9975	333.022	6.83264	335.289	4.21713
Plešovice-33	0.0511277	0.00129131	0.38208	0.00975489	0.0543562	0.000736135	0.530446		255.62	57.395	328.567	7.17018	341.211	4.50456
Plešovice-34	0.0542191	0.00127673	0.395254	0.00926702	0.0527926	0.000668421	0.540024		388.94	51.8475	338.2	6.74791	331.644	4.09676
Plešovice-35	0.0547348	0.00135437	0.402597	0.00982992	0.0532432	0.000715451	0.550347		466.71	55.55	343.53	7.12002	334.402	4.38267
Plešovice-36	0.0512492	0.00121614	0.376805	0.00880739	0.0532192	0.000692568	0.556755		253.77	53.6925	324.685	6.49913	334.255	4.24282
Plešovice-37	0.0537328	0.00132502	0.39415	0.00980409	0.0531976	0.000690794	0.522048		361.165	55.55	337.396	7.14417	334.123	4.23206
Plešovice-38	0.0540515	0.0011328	0.399936	0.0083471	0.0536726	0.000691133	0.61697		372.275	48.145	341.602	6.05866	337.03	4.23229
LA-ICP-MS results (NWU)
Jilin-01	0.0457412	0.00150212	0.11482	0.00384059	0.0182073	0.000143022	0.234843		18.325	51.632	110.365	3.49883	116.316	0.907667
Jilin-02	0.0465913	0.00203577	0.120196	0.00518613	0.0187818	0.000204273	0.25207		27.875	103.695	115.25	4.70153	119.952	1.29417
Jilin-03	0.0480737	0.00185147	0.12058	0.00446463	0.0183092	0.000181999	0.268466		101.94	90.73	115.598	4.04626	116.961	1.15388
Jilin-04	0.0465509	0.00192801	0.116995	0.00472443	0.0183341	0.000197119	0.266248		33.43	90.73	112.344	4.29533	117.119	1.24943
Jilin-05	0.0467466	0.00157107	0.118193	0.00394728	0.0183613	0.000179682	0.293019		35.28	87.03	113.433	3.58519	117.291	1.13918
Jilin-06	0.0512286	0.00173662	0.130417	0.00445256	0.0184529	0.000157031	0.249257		250.065	77.765	124.473	4.00035	117.871	0.99598
Jilin-07	0.0516786	0.00205202	0.131353	0.00484679	0.0185887	0.000190585	0.277861		272.285	95.355	125.313	4.3508	118.73	1.20787
Jilin-08	0.0491999	0.00128038	0.124558	0.0031737	0.0183894	0.00015387	0.32839		166.75	61.1025	119.196	2.86674	117.469	0.976059
Jilin-09	0.0497743	0.00303481	0.126081	0.00764131	0.018499	0.000244614	0.218179		183.415	142.575	120.57	6.89063	118.163	1.54956
Jilin-10	0.0511288	0.00221495	0.130381	0.00540076	0.0186379	0.000226281	0.293098		255.62	99.985	124.44	4.85205	119.042	1.43345
Jilin-11	0.0461251	0.00131914	0.116368	0.00342266	0.0182786	0.000138428	0.257484		400.05	322.18	111.773	3.11398	116.767	0.878613
Jilin-12	0.0478045	0.00291814	0.119388	0.00705405	0.0182957	0.000191362	0.177022		100.09	127.755	114.517	6.39912	116.876	1.21307
Jilin-13	0.0498098	0.00206396	0.126987	0.00534232	0.0185307	0.000204272	0.262029		187.12	96.28	121.387	4.81398	118.363	1.29444
Jilin-14	0.0487672	0.00172233	0.124171	0.00439869	0.0184739	0.000156206	0.23869		200.075	83.3225	118.846	3.97384	118.004	0.990754
Jilin-15	0.0491331	0.000975057	0.12463	0.00244118	0.0184189	0.000145796	0.404114		153.79	46.2925	119.261	2.20554	117.656	0.925048
Jilin-16	0.0509616	0.00193721	0.127025	0.0047177	0.0181271	0.00016355	0.242929		238.955	87.0225	121.421	4.25117	115.809	1.03743
Jilin-17	0.0499796	0.0017016	0.124902	0.00379561	0.0182806	0.000163677	0.294634		194.525	74.9875	119.506	3.42704	116.78	1.03811
Jilin-18	0.0482917	0.00209483	0.122678	0.00534173	0.0184772	0.000202598	0.251816		122.31	101.838	117.497	4.83188	118.024	1.28392
Jilin-19	0.0486706	0.00161944	0.123318	0.00396377	0.0184676	0.000187574	0.315994		131.57	79.6175	118.075	3.58381	117.964	1.18896
Jilin-20	0.0481861	0.00138529	0.121667	0.00368815	0.0182966	0.000147369	0.265707		109.35	68.5125	116.582	3.33962	116.881	0.935067
Plešovice-01	0.0536047	0.000956297	0.395329	0.00710906	0.0534324	0.000412982	0.429808		353.76	36.1075	338.255	5.17838	335.56	2.53371
Plešovice-02	0.0533194	0.000916465	0.392518	0.00667883	0.053359	0.000408621	0.450061		342.65	43.515	336.207	4.87537	335.111	2.50724
Plešovice-03	0.052832	0.000945363	0.385533	0.00715084	0.0528624	0.000404782	0.412837		320.43	40.7375	331.101	5.24531	332.071	2.48486
Plešovice-04	0.0542893	0.00097045	0.40161	0.00735489	0.0536317	0.000460941	0.469302		383.385	45.365	342.815	5.33328	336.779	2.82603
Plešovice-05	0.0538628	0.0008465	0.393253	0.00618074	0.0529311	0.00037845	0.454914		364.87	69.4375	336.743	4.51025	332.492	2.32395
Plešovice-06	0.0512428	0.000879518	0.382605	0.00693545	0.054126	0.000396305	0.403924		250.065	43.5125	328.953	5.09829	339.803	2.4305
Plešovice-07	0.0526954	0.000872342	0.385858	0.00646195	0.0531121	0.000389171	0.437534		316.725	38.885	331.34	4.73987	333.6	2.38904
Plešovice-08	0.0520481	0.000952755	0.383498	0.00704883	0.0534558	0.00040933	0.416606		287.1	36.1075	329.609	5.17816	335.703	2.51136
Plešovice-09	0.0520925	0.000936927	0.385498	0.00719047	0.0536567	0.000423999	0.423649		300.06	37.96	331.076	5.27445	336.932	2.60045
Plešovice-10	0.0519068	0.000933211	0.384887	0.00755603	0.0537358	0.000405035	0.383945		279.69	40.7375	330.628	5.54455	337.417	2.48456
Plešovice-11	0.0537139	0.000950066	0.395859	0.00708802	0.0534905	0.00038769	0.404785		366.72	38.885	338.64	5.16114	335.916	2.37924
Plešovice-12	0.0533817	0.000938922	0.394524	0.00727277	0.0536151	0.000432873	0.437973		346.35	38.885	337.669	5.30044	336.678	2.65471
Plešovice-13	0.0532389	0.000900789	0.390904	0.00644243	0.0532551	0.000350732	0.399609		338.945	37.035	335.03	4.7086	334.475	2.15423
Plešovice-14	0.0520849	0.000999568	0.384546	0.00678752	0.0536702	0.000448055	0.472972		300.06	37.96	330.378	4.98282	337.015	2.74726
Plešovice-15	0.0520124	0.000842477	0.387428	0.00648792	0.0540448	0.000476762	0.526784		287.1	34.255	332.489	4.75354	339.307	2.92157
Plešovice-16	0.0542681	0.000926839	0.398551	0.00676264	0.0532724	0.000362494	0.40102		383.385	38.885	340.597	4.9153	334.581	2.22594
Plešovice-17	0.0534464	0.000913519	0.394899	0.00670418	0.0536345	0.000360272	0.395664		346.35	38.885	337.942	4.88555	336.797	2.21173
Plešovice-18	0.0550063	0.00095772	0.399908	0.00692609	0.0527706	0.000325256	0.355882		413.01	38.885	341.582	5.02901	331.509	1.99967
Plešovice-19	0.0537734	0.000926808	0.393429	0.00698746	0.0530773	0.000357353	0.379084		361.165	38.885	336.871	5.09687	333.387	2.19493
LA-ICP-MS results (IGGCAS)
Jilin-01	0.0477874	0.00134599	0.12032	0.0033959	0.0182851	0.000210638	0.408154		87.13	66.66	115.362	3.07882	116.809	1.33497
Jilin-02	0.0498153	0.0019704	0.124617	0.00492125	0.0181665	0.000251254	0.350224		187.12	87.95	119.249	4.44399	116.058	1.59203
Jilin-03	0.0497142	0.00127922	0.125304	0.00313188	0.0183738	0.000234614	0.510876		188.97	59.2475	119.87	2.82713	117.37	1.48648
Jilin-04	0.0499042	0.00164744	0.12539	0.0039018	0.0184597	0.000275342	0.479342		190.82	71.285	119.947	3.52134	117.914	1.74396
Jilin-05	0.0502303	0.00149246	0.125019	0.00385584	0.0179991	0.000227234	0.409334		205.63	36.105	119.612	3.48103	114.998	1.44028
Jilin-06	0.0500969	0.00179088	0.127396	0.00447631	0.0184575	0.000280217	0.432075		198.23	78.69	121.755	4.03242	117.9	1.7748
Jilin-07	0.0512737	0.00309702	0.123785	0.00706748	0.0179725	0.000327121	0.318789		253.77	138.87	118.498	6.38625	114.829	2.07245
Jilin-08	0.0487179	0.00207787	0.122354	0.00534504	0.0181859	0.000259463	0.326593		200.075	99.985	117.204	4.83626	116.181	1.64393
Jilin-09	0.0493654	0.00176789	0.124266	0.0045841	0.01824	0.000255913	0.380335		164.9	87.95	118.932	4.14093	116.523	1.62139
Jilin-10	0.0490543	0.00244355	0.120655	0.00547922	0.0184353	0.00033285	0.39758		150.085	118.502	115.665	4.96513	117.759	2.10781
Jilin-11	0.0493891	0.00234522	0.123916	0.0057469	0.0184594	0.000289103	0.337699		164.9	111.095	118.616	5.19256	117.912	1.83101
Jilin-12	0.0465267	0.00133906	0.116281	0.00316216	0.0182231	0.000211888	0.427574		33.43	66.66	111.695	2.87734	116.416	1.34294
Jilin-13	0.048256	0.00137	0.121748	0.00341244	0.0182923	0.000205863	0.401519		122.31	66.66	116.655	3.08989	116.854	1.30477
Jilin-14	0.0495006	0.00129813	0.124625	0.0031151	0.0183503	0.000231582	0.504888		172.305	61.1	119.256	2.81368	117.221	1.46734
Jilin-15	0.0468418	0.00139653	0.120048	0.00330791	0.0187016	0.000241748	0.46912		42.69	66.66	115.115	2.99982	119.445	1.53116
Jilin-16	0.0483987	0.00135477	0.124598	0.00338238	0.0186797	0.000260854	0.514421		120.46	66.66	119.232	3.05497	119.306	1.65199
Jilin-17	0.0498319	0.00240259	0.122667	0.0058383	0.0181973	0.000358376	0.413783		187.12	108.317	117.487	5.28099	116.253	2.26982
Jilin-18	0.049091	0.00179658	0.123781	0.0044741	0.0183943	0.000272939	0.410519		153.79	85.17	118.495	4.04334	117.5	1.72886
Jilin-19	0.0491442	0.00164676	0.122169	0.00409999	0.0181306	0.000261571	0.42989		153.79	77.765	117.037	3.71069	115.83	1.65735
Jilin-20	0.0477341	0.00109207	0.122818	0.00283402	0.0185813	0.000205549	0.479401		87.13	53.6975	117.624	2.5641	118.683	1.30246
Jilin-21	0.0511028	0.00317864	0.125026	0.00726638	0.018309	0.000378084	0.35531		255.62	144.425	119.619	6.55872	116.96	2.3943
Jilin-22	0.0486331	0.00159289	0.122949	0.00402175	0.0183487	0.000279753	0.466101		131.57	77.7675	117.742	3.6374	117.211	1.77204
Jilin-24	0.0507737	0.00309233	0.122357	0.00655239	0.0180243	0.000314799	0.326139		231.55	140.722	117.207	5.92841	115.158	1.99436
91500-01	0.0767042	0.00220156	1.84659	0.0522745	0.175904	0.00293352	0.589108		1122.22	57.405	1062.22	18.6604	1044.56	16.0917
91500-02	0.074786	0.00203163	1.84618	0.0541684	0.17891	0.00310764	0.592003		1062.66	54.7825	1062.07	19.3382	1061.02	17.0026
91500-03	0.076556	0.00227639	1.8641	0.0581771	0.177261	0.00292437	0.528608		1109.26	59.2575	1068.44	20.6378	1052	16.0232
91500-04	0.0729734	0.00192463	1.83913	0.0498552	0.183485	0.00314355	0.632006		1012.96	53.3975	1059.55	17.8447	1085.99	17.1329
91500-05	0.0740043	0.00215044	1.81883	0.0526332	0.178017	0.00304686	0.591459		1042.6	57.87	1052.27	18.9727	1056.13	16.683
91500-06	0.074618	0.00189271	1.82183	0.0473387	0.177593	0.00298251	0.646316		1057.41	51.8525	1053.34	17.049	1053.81	16.3368
91500-07	0.0734799	0.00207983	1.82335	0.050911	0.180169	0.00321689	0.639461		1027.78	57.41	1053.89	18.3235	1067.9	17.581
91500-08	0.0782206	0.00230864	1.93588	0.0563478	0.17999	0.0032181	0.614258		1153.71	57.87	1093.57	19.5023	1066.92	17.5903
LA-ICP-MS results (WHSSATC)
Jilin-01	0.0477146	0.00318709	0.116354	0.00697078	0.0179423	0.000268877	0.250136		83.425	151.825	111.762	6.34075	114.638	1.70387
Jilin-02	0.0501859	0.00233794	0.124989	0.00555121	0.0181134	0.000214086	0.266117		211.185	104.615	119.585	5.01103	115.722	1.35697
Jilin-03	0.048711	0.00200059	0.123736	0.00498285	0.0184999	0.000221698	0.297584		200.075	96.2825	118.453	4.50311	118.169	1.40465
Jilin-04	0.0493286	0.00301385	0.123516	0.00688509	0.0184904	0.000261984	0.25418		164.9	144.425	118.254	6.22296	118.108	1.65943
Jilin-05	0.0494017	0.00278724	0.121496	0.00642769	0.0180895	0.000251087	0.262365		168.6	133.315	116.428	5.82006	115.57	1.59108
Jilin-06	0.0489711	0.00247212	0.122264	0.00616282	0.0181224	0.000209046	0.228847		146.38	113.873	117.123	5.57646	115.778	1.32508
Jilin-07	0.0473652	0.00320842	0.11462	0.00686275	0.0179325	0.00028149	0.262171		77.87	142.57	110.183	6.2522	114.576	1.78371
Jilin-08	0.0514705	0.00152363	0.131167	0.00401433	0.0184881	0.0001881	0.332438		261.175	68.5075	125.146	3.60443	118.094	1.19227
Jilin-09	0.04762	0.00191153	0.120517	0.0047065	0.0184112	0.000186085	0.25881		79.72	92.585	115.541	4.26563	117.607	1.1796
Jilin-10	0.0477104	0.00191796	0.122378	0.00495667	0.0185771	0.000198108	0.263293		83.425	92.585	117.226	4.48486	118.657	1.25543
Jilin-11	0.0472489	0.00216474	0.116826	0.00518883	0.0180646	0.000209504	0.261117		61.205	107.395	112.191	4.71814	115.412	1.32805
Jilin-12	0.0485043	0.00186523	0.120084	0.00446884	0.018025	0.000216007	0.32202		124.16	90.7275	115.149	4.05186	115.162	1.36923
Jilin-13	0.0501658	0.00255418	0.124243	0.00587295	0.0181593	0.000239663	0.2792		211.185	118.502	118.911	5.3049	116.012	1.5187
Jilin-14	0.049622	0.00212484	0.122788	0.00522464	0.0180048	0.000232333	0.303265		176.01	99.985	117.596	4.72553	115.034	1.47254
Jilin-15	0.0468041	0.00219883	0.118329	0.00559704	0.0182919	0.000231658	0.267744		38.985	107.395	113.556	5.0824	116.852	1.46789
Jilin-16	0.0485427	0.00245542	0.12064	0.00552162	0.0180783	0.00022597	0.273099		124.16	80.5475	115.652	5.00362	115.499	1.43219
Jilin-17	0.0474365	0.00171117	0.119103	0.00419373	0.0182159	0.000160667	0.250494		77.87	75.92	114.258	3.80584	116.371	1.01914
Jilin-18	0.0472753	0.00208959	0.116169	0.00493473	0.0179435	0.000204633	0.26847		64.91	99.99	111.593	4.48978	114.646	1.29737
Jilin-19	0.0497282	0.00352429	0.121907	0.00799421	0.0180117	0.000229672	0.194449		188.97	164.792	116.8	7.2356	115.078	1.45569
Jilin-20	0.0473286	0.00237541	0.118605	0.00585257	0.0183002	0.000227964	0.252444		64.91	124.06	113.807	5.31308	116.905	1.44452
Jilin-21	0.0494493	0.00272166	0.121227	0.00623938	0.0179854	0.00026048	0.281392		168.6	132.39	116.184	5.65094	114.911	1.65066
Jilin-22	0.0489799	0.0025354	0.123779	0.0063219	0.0183591	0.000257624	0.274746		146.38	122.205	118.492	5.71269	117.277	1.63204
Jilin-23	0.0482311	0.0025694	0.118566	0.00640798	0.0178207	0.000252101	0.261751		109.35	122.2	113.771	5.81738	113.868	1.59788
Jilin-24	0.0494446	0.0021018	0.123193	0.00516855	0.0181481	0.000215363	0.28285		168.6	99.985	117.962	4.67313	115.942	1.36501
Jilin-25	0.0483831	0.00213933	0.121795	0.00529402	0.0182645	0.000184933	0.232944		116.755	105.54	116.698	4.79249	116.678	1.17247
Jilin-26	0.0499755	0.00270207	0.126731	0.00686749	0.0184444	0.000235836	0.235956		194.525	128.685	121.156	6.18937	117.817	1.49412
Jilin-27	0.0504965	0.00225095	0.128381	0.00528238	0.0186961	0.000238231	0.309684		216.74	97.2075	122.642	4.75413	119.41	1.50893
Jilin-28	0.0471197	0.0021827	0.11828	0.00542667	0.0182739	0.000220756	0.263304		53.8	107.395	113.511	4.92795	116.738	1.39897
Jilin-29	0.0473929	0.00332486	0.119856	0.00732101	0.0184391	0.000287671	0.255415		77.87	149.975	114.942	6.63848	117.784	1.82198
Jilin-30	0.047956	0.00212411	0.121458	0.00526839	0.0184164	0.000212891	0.266502		98.24	99.99	116.393	4.77072	117.64	1.34906
Jilin-31	0.0472317	0.00190431	0.11848	0.00460163	0.0183038	0.000193057	0.271567		61.205	92.585	113.693	4.17819	116.927	1.22378
Jilin-32	0.0495295	0.00251354	0.122915	0.00601828	0.0180798	0.000221604	0.250331		172.305	118.502	117.711	5.44255	115.509	1.40457
Jilin-33	0.0481832	0.0025007	0.120692	0.00573331	0.0184515	0.000231263	0.263844		109.35	124.05	115.699	5.19516	117.862	1.46519
Jilin-34	0.0477297	0.003049	0.118066	0.00733071	0.0180702	0.000226857	0.202195		87.13	144.42	113.318	6.6579	115.448	1.43781
Jilin-35	0.0505072	0.00308329	0.129379	0.00729824	0.0188496	0.000304649	0.286513		216.74	137.945	123.54	6.56211	120.382	1.92866
Jilin-36	0.0487387	0.00261594	0.121659	0.00623611	0.0183337	0.000238774	0.254077		200.075	71.29	116.575	5.64581	117.116	1.51284
Jilin-37	0.0478629	0.00238814	0.119858	0.00572366	0.0182953	0.000241616	0.276554		100.09	105.54	114.944	5.19027	116.873	1.53087
Plešovice-01	0.0547403	0.00121746	0.409797	0.00900574	0.0541811	0.000445528	0.374176		466.71	49.995	348.729	6.49057	340.14	2.73063
Plešovice-02	0.0560127	0.00115164	0.422237	0.00867403	0.0545397	0.000414011	0.369517		453.75	46.2925	357.649	6.19746	342.333	2.5376
Plešovice-03	0.0541672	0.00118564	0.406498	0.00938818	0.0539935	0.000474577	0.380577		388.94	49.995	346.35	6.78163	338.993	2.90837
Plešovice-04	0.053466	0.00113047	0.399401	0.00809557	0.0539927	0.000466302	0.426083		350.055	46.2925	341.214	5.8786	338.988	2.85786
Plešovice-05	0.0526378	0.00112368	0.392508	0.00842098	0.053802	0.000471143	0.408169		322.28	48.1425	336.2	6.14463	337.822	2.88788
Plešovice-06	0.0519883	0.00108048	0.387718	0.007719	0.0539189	0.000487457	0.454098		283.395	48.145	332.701	5.65247	338.537	2.98718
Plešovice-07	0.0575755	0.00133949	0.424467	0.00929631	0.0534832	0.000419606	0.358227		522.26	51.8475	359.24	6.63106	335.871	2.57403
Plešovice-08	0.0520017	0.000927799	0.387046	0.00700091	0.0538181	0.000445904	0.458059		287.1	40.735	332.21	5.12997	337.92	2.73378

## Sheet: Table S6
Table S6. Hafnium isotopic composition of Jilin zircon.
solution-MC-ICP-MS
Analytical spots	176Hf/177Hf	SE
Jilin-01	0.282923	9.99219e-06
Jilin-02	0.282927	7.46842e-06
Jilin-03	0.282924	8.09646e-06
Jilin-04	0.282919	8.12315e-06
Jilin-05	0.282926	7.18677e-06
Jilin-06	0.28292	7.11837e-06
Jilin-07	0.282934	7.98071e-06
Jilin-08	0.282933	9.86195e-06
Jilin-09	0.282931	8.86506e-06
Jilin-10	0.282926	1.0052e-05
Jilin-11	0.28292	9.79242e-06
Jilin-12	0.282924	9.79668e-06
Jilin-13	0.282931	6.71845e-06
Jilin-14	0.28293	8.86917e-06
Jilin-15	0.282929	8.51997e-06
Jilin-16	0.282924	4.73552e-06
Jilin-17	0.282914	6.06612e-06
JMC475	0.282152	5.1002e-06
JMC475	0.282153	1.11031e-05
JMC475	0.282155	4.55268e-06
JMC475	0.282156	5.66927e-06
BCR-2	0.282865	8.82516e-06
BCR-2	0.28287	5.76542e-06
RGM-2	0.283018	5.51448e-06
AlfaHf	0.282222	5.69972e-06
AlfaHf	0.282226	6.11564e-06
AlfaHf	0.282224	4.97043e-06
AlfaHf	0.282224	5.73799e-06
AlfaHf	0.282227	5.79077e-06
AlfaHf	0.282221	6.54834e-06
AlfaHf	0.282224	6.12748e-06
AlfaHf	0.282225	7.48412e-06
AlfaHf	0.282223	6.98533e-06
AlfaHf	0.282224	6.80361e-06
AlfaHf	0.282223	6.24876e-06
AlfaHf	0.282225	6.79668e-06
AlfaHf	0.282224	7.22634e-06
AlfaHf	0.282221	4.24101e-06
AlfaHf	0.28222	6.19194e-06
AlfaHf	0.282223	7.0848e-06
AlfaHf	0.282225	6.52159e-06
AlfaHf	0.282226	9.61747e-06
AlfaHf	0.282222	9.77985e-06
AlfaHf	0.282224	4.81239e-06
AlfaHf	0.282224	9.30997e-06
AlfaHf	0.282223	9.01808e-06
Continued-Table S6. Hafnium isotopic composition of Jilin zircon.
LA-MC-ICP-MS CUG-Session 1
	176Hf/177Hf	2σ	176Lu/177Hf	2σ	176Yb/177Hf	2σ
Jilin-01	0.282948	1.5866e-05	0.000943761	4.4715e-06	0.0413774	0.000179548
Jilin-02	0.28292	1.03195e-05	0.000591453	1.22818e-05	0.0255129	0.000542117
Jilin-03	0.28294	1.48928e-05	0.000825948	2.30288e-05	0.037251	0.00114399
Jilin-04	0.282967	1.75785e-05	0.00107825	3.24157e-06	0.047589	0.000163694
Jilin-05	0.282917	1.36562e-05	0.000505043	5.86854e-06	0.0217484	0.000278299
Jilin-06	0.282905	1.788e-05	0.000532507	2.28195e-06	0.022944	0.000141489
Jilin-07	0.282926	1.57923e-05	0.000534624	2.27862e-06	0.0229937	0.000118254
Jilin-08	0.282919	1.64107e-05	0.000566124	1.37649e-06	0.0243433	7.21569e-05
Jilin-09	0.282926	1.57833e-05	0.000677344	2.48087e-05	0.029243	0.00111938
Jilin-10	0.282899	1.19109e-05	0.000473824	1.43758e-06	0.0200202	0.000100657
Jilin-11	0.282948	1.42523e-05	0.00132544	4.60079e-05	0.0579442	0.00208515
Jilin-12	0.282904	1.56581e-05	0.000437646	3.22416e-06	0.0181573	0.000184193
Jilin-13	0.282909	1.59946e-05	0.00080128	3.89329e-06	0.0346208	0.000206106
Jilin-14	0.282917	1.63367e-05	0.000903687	2.60105e-06	0.0395268	0.000130695
Jilin-15	0.282921	1.60621e-05	0.000983568	1.51458e-05	0.0429587	0.000676861
Jilin-16	0.282911	2.40457e-05	0.000478089	3.69374e-05	0.0189917	0.00164997
Jilin-17	0.282908	1.32675e-05	0.000384484	4.89489e-06	0.0160818	0.000209237
Jilin-18	0.282898	1.28681e-05	0.000339859	1.43693e-06	0.0141474	3.88104e-05
Jilin-19	0.282908	1.43635e-05	0.000408763	4.35988e-06	0.0170647	0.000172898
Jilin-20	0.282914	1.15933e-05	0.000677975	8.00612e-06	0.0289944	0.000290099
Jilin-21	0.28293	1.40821e-05	0.000947186	2.07893e-05	0.0411506	0.000954817
Jilin-22	0.282945	1.37912e-05	0.000999241	2.01622e-06	0.044703	0.000184808
Jilin-23	0.282915	1.47079e-05	0.000625303	1.54778e-05	0.0261903	0.000521074
Jilin-24	0.282926	1.69607e-05	0.00118351	1.41592e-05	0.0502532	0.000617222
Jilin-25	0.282926	1.72204e-05	0.000801022	2.37861e-05	0.0331639	0.00105487
Jilin-26	0.282918	1.80889e-05	0.00112024	2.18097e-05	0.0485795	0.00106067
Jilin-27	0.28293	1.65193e-05	0.00109227	1.81359e-05	0.0479582	0.000750838
Jilin-28	0.282926	1.74631e-05	0.000776517	2.62804e-05	0.0339139	0.00123638
Jilin-29	0.28293	2.14869e-05	0.00135267	2.76861e-05	0.0580558	0.00117561
Jilin-30	0.282937	1.84603e-05	0.00155174	6.01371e-06	0.0667579	0.000320104
Jilin-31	0.282956	2.10345e-05	0.00155396	4.30459e-05	0.0672505	0.0019292
Jilin-32	0.282922	2.02629e-05	0.00125388	4.16553e-06	0.0540477	0.000199036
Jilin-33	0.282905	1.58131e-05	0.000597674	3.43819e-06	0.0255235	0.000228515
Jilin-34	0.282928	2.00996e-05	0.00156476	7.49367e-06	0.0672383	0.000349373
Jilin-35	0.282952	2.26567e-05	0.0011624	2.54734e-05	0.0501699	0.00126861
Jilin-36	0.282943	2.05797e-05	0.00122678	2.32881e-05	0.0526933	0.00106398
Jilin-37	0.282914	1.92666e-05	0.00105721	2.09188e-05	0.0453262	0.000838814
Jilin-38	0.28291	1.94508e-05	0.000932793	2.56397e-05	0.0402772	0.00102716
Jilin-39	0.282895	1.92245e-05	0.000826297	2.55444e-05	0.0354174	0.000996611
Jilin-40	0.282916	2.10235e-05	0.000927376	9.06687e-05	0.0394862	0.00397357
Jilin-41	0.282925	1.8892e-05	0.000874393	4.08927e-06	0.0375389	0.000118518
Jilin-42	0.282892	1.95855e-05	0.000539889	9.52198e-06	0.0224396	0.000401705
Jilin-43	0.282896	1.81738e-05	0.000375732	1.71901e-06	0.0153261	0.000112798
Jilin-44	0.282914	1.60272e-05	0.00102452	1.04406e-05	0.0429076	0.000407817
Jilin-45	0.282896	2.04331e-05	0.000447646	2.04344e-06	0.0182526	0.000125073
Jilin-46	0.282946	1.81487e-05	0.000865952	6.29739e-06	0.037422	0.000348932
Jilin-47	0.282915	1.78352e-05	0.000962759	4.68995e-06	0.041991	0.000165094
Jilin-48	0.282913	1.82388e-05	0.000725054	3.79194e-05	0.0307727	0.0017895
Jilin-49	0.282889	1.74653e-05	0.000404984	1.4432e-05	0.0169886	0.000656468
Jilin-50	0.282908	1.68076e-05	0.000436163	1.00534e-06	0.0183521	4.48747e-05
Jilin-51	0.282916	1.94239e-05	0.000914367	3.07075e-05	0.0392622	0.00124334
Jilin-52	0.282927	1.87691e-05	0.000952131	2.37439e-05	0.0405626	0.000874169
Jilin-53	0.282935	1.82545e-05	0.00176769	7.12487e-05	0.0767707	0.002734
Jilin-54	0.282929	2.19889e-05	0.00073124	1.63461e-05	0.0315125	0.000811031
Jilin-55	0.282908	1.43316e-05	0.000835292	4.5933e-06	0.0352001	0.000111295
Jilin-56	0.282924	1.95351e-05	0.000704871	2.63788e-06	0.0300338	0.000112024
Jilin-57	0.282903	1.86376e-05	0.000438725	7.5715e-06	0.0176236	0.000350616
Jilin-58	0.282907	1.52953e-05	0.000851799	5.81584e-06	0.0358686	0.000155764
Jilin-59	0.282916	1.35955e-05	0.00091444	6.72381e-06	0.039002	0.000259896
Jilin-60	0.282907	1.22606e-05	0.000559192	1.5373e-05	0.0235804	0.000689252
Jilin-61	0.282905	1.33245e-05	0.000409041	2.58609e-05	0.0170994	0.00118318
Jilin-62	0.28291	1.76556e-05	0.000841898	2.66495e-06	0.0364149	0.000114828
Jilin-63	0.282922	1.87947e-05	0.000926518	1.90329e-06	0.0398916	8.46804e-05
Jilin-64	0.282927	2.05859e-05	0.000935578	1.80435e-06	0.0400548	0.000131382
Jilin-65	0.282912	2.10699e-05	0.000921376	1.24913e-05	0.0388362	0.000651744
Jilin-66	0.282895	1.70776e-05	0.000575626	1.74311e-05	0.0244336	0.00076718
Jilin-67	0.282941	1.40635e-05	0.000900407	4.5225e-06	0.0385923	0.000221358
Jilin-68	0.282902	1.81091e-05	0.000470108	2.09685e-06	0.0191301	0.000165447
Jilin-69	0.282907	1.54008e-05	0.000915347	3.35461e-05	0.0371214	0.00145836
Jilin-70	0.282899	1.51336e-05	0.00060921	6.69565e-06	0.0249098	0.000357331
Jilin-71	0.282912	1.62734e-05	0.000781525	4.57191e-05	0.0318998	0.00192584
Jilin-72	0.282937	1.76887e-05	0.00159718	1.66654e-05	0.0678044	0.000971603
Jilin-73	0.282948	2.13813e-05	0.00163468	3.04673e-05	0.0690121	0.00151372
Jilin-74	0.282937	2.30595e-05	0.00123092	3.08646e-05	0.0517811	0.00145591
Jilin-75	0.282901	1.89881e-05	0.000584087	1.57899e-05	0.0246757	0.000764405
Jilin-76	0.282946	1.84438e-05	0.00167996	9.1813e-06	0.0717737	0.000541418
Jilin-77	0.282932	2.06396e-05	0.00158508	3.66693e-06	0.0686885	0.000210576
Jilin-78	0.282912	2.03165e-05	0.00109684	1.03627e-05	0.0460185	0.000335554
Jilin-79	0.282898	1.86162e-05	0.000777566	4.23742e-05	0.0321056	0.00178712
Jilin-80	0.282919	1.75482e-05	0.00103362	4.08076e-05	0.0438697	0.00179779
Jilin-81	0.282922	1.99206e-05	0.000910945	6.70041e-06	0.0388697	0.00035335
Jilin-82	0.282925	2.00348e-05	0.000863879	5.91291e-06	0.0371272	0.000221763
Jilin-83	0.282908	2.31886e-05	0.000795276	5.32671e-06	0.0338645	0.000208389
Jilin-84	0.28291	2.21151e-05	0.000931227	6.06012e-05	0.038565	0.00250435
Jilin-85	0.282925	2.2392e-05	0.000889235	1.27361e-05	0.0377554	0.000489168
Jilin-86	0.28293	2.16025e-05	0.00104073	1.56685e-05	0.0437888	0.000740235
Jilin-87	0.282917	2.26207e-05	0.000752296	5.81005e-05	0.0311218	0.00250281
Jilin-88	0.282927	2.16969e-05	0.00156508	1.97794e-05	0.0667048	0.00092054
Jilin-89	0.282927	2.40746e-05	0.00129297	3.98027e-05	0.0544813	0.00168107
Jilin-90	0.28293	2.45317e-05	0.000892957	4.38803e-06	0.0381814	0.000179741
Jilin-91	0.282899	2.47158e-05	0.000512316	7.57281e-06	0.0214573	0.00029055
Jilin-92	0.282908	2.34558e-05	0.00078221	1.90794e-05	0.0332044	0.000907856
Jilin-93	0.282904	1.74779e-05	0.000569902	1.31536e-05	0.0238106	0.000527645
Jilin-94	0.282908	2.07847e-05	0.000839091	6.97386e-06	0.0353386	0.000336561
Jilin-95	0.282899	1.87639e-05	0.000780962	1.59566e-06	0.033093	0.000121048
Jilin-96	0.2829	1.678e-05	0.000604394	2.27039e-06	0.0246202	0.00016008
Jilin-97	0.282906	1.98437e-05	0.000679662	2.64873e-06	0.0276386	0.000139006
Jilin-98	0.282933	1.68703e-05	0.000923315	2.01878e-05	0.0393522	0.000915482
Jilin-99	0.28296	1.86595e-05	0.00221223	6.22958e-05	0.0971405	0.00257092
Jilin-100	0.282936	2.10704e-05	0.00120546	0.000106859	0.0518033	0.00454565
Jilin-101	0.282921	1.83871e-05	0.000719754	5.43446e-06	0.0309688	0.000322686
Jilin-102	0.282913	1.9572e-05	0.000666957	8.20035e-06	0.0288382	0.00029522
Jilin-103	0.282913	1.50688e-05	0.000493474	6.55802e-06	0.020702	0.000221057
Jilin-104	0.282911	1.38319e-05	0.000674845	9.01607e-06	0.0290073	0.000404984
Jilin-105	0.282893	1.62718e-05	0.000484742	2.18893e-06	0.0199456	0.000113733
Jilin-106	0.282913	1.41528e-05	0.000367497	2.83759e-05	0.0151779	0.00129361
Jilin-107	0.2829	1.34672e-05	0.000441086	2.55411e-06	0.0179607	0.000133056
Jilin-108	0.282901	1.55855e-05	0.000447635	2.78497e-06	0.0185493	0.000137594
Jilin-109	0.282904	1.45088e-05	0.000489875	3.10047e-06	0.0207797	0.000181533
Jilin-110	0.282928	1.27542e-05	0.000983104	4.77444e-06	0.0420684	0.000272191
Jilin-111	0.282906	1.56646e-05	0.000564111	2.01076e-06	0.0228813	0.000125692
Jilin-112	0.282933	1.3346e-05	0.00102826	1.00463e-05	0.0432142	0.000499305
Jilin-113	0.282916	1.8527e-05	0.000563843	2.35478e-05	0.0235609	0.00104998
Jilin-114	0.282921	1.74737e-05	0.00108898	1.6021e-05	0.0475229	0.000634921
Jilin-115	0.282916	2.1783e-05	0.00126164	2.80692e-05	0.0546248	0.00105377
Jilin-116	0.282916	1.82628e-05	0.0010203	4.58904e-06	0.0439604	0.000444206
Jilin-117	0.28292	1.73476e-05	0.000815334	1.30769e-05	0.0353517	0.000616361
Jilin-118	0.282905	1.81829e-05	0.000870353	8.86407e-06	0.0373015	0.000329552
Jilin-119	0.282891	1.83419e-05	0.000285623	3.19565e-06	0.0114414	0.000125739
Jilin-120	0.282921	1.64633e-05	0.000843879	1.57034e-05	0.0364538	0.000732776
Jilin-121	0.282913	1.69958e-05	0.000771503	1.58748e-05	0.0326064	0.000799141
Jilin-122	0.282893	1.74125e-05	0.000460884	1.05736e-05	0.0190421	0.000438871
Jilin-123	0.282919	1.27858e-05	0.00110579	5.16216e-06	0.0456873	0.000267135
Jilin-124	0.2829	1.64753e-05	0.000735748	1.82256e-05	0.0310125	0.000807002
Jilin-125	0.282943	1.79674e-05	0.000985016	4.73802e-06	0.0423506	0.000337615
Jilin-126	0.282917	1.42783e-05	0.000572697	1.09578e-05	0.0241496	0.000464404
Jilin-127	0.282896	1.27634e-05	0.000527629	2.33486e-05	0.022183	0.00104421
Jilin-128	0.282915	1.32783e-05	0.000462711	4.78311e-06	0.019498	0.000215085
Jilin-129	0.282915	1.51524e-05	0.000659295	1.89567e-05	0.0278654	0.000783609
Jilin-130	0.28292	1.59008e-05	0.00058353	6.62553e-06	0.0249298	0.000399368
Jilin-131	0.282909	1.46696e-05	0.000549995	1.15377e-05	0.023681	0.000416714
Jilin-132	0.282903	1.33524e-05	0.000476384	1.00483e-05	0.0203191	0.000371087
Jilin-133	0.282916	1.28859e-05	0.000765978	3.27431e-06	0.0336296	7.20008e-05
Jilin-134	0.282913	1.4305e-05	0.000779093	1.25171e-05	0.0336426	0.000424115
Jilin-135	0.282894	1.31477e-05	0.000462922	2.36652e-05	0.0190839	0.00102944
Jilin-136	0.282917	1.40346e-05	0.000689229	2.76547e-05	0.0290831	0.00109766
Jilin-137	0.282899	1.62636e-05	0.00036306	1.39811e-05	0.0145758	0.000506213
Jilin-138	0.282946	1.49621e-05	0.000871664	5.09495e-05	0.0376133	0.00223869
Jilin-139	0.282936	1.97555e-05	0.000985125	2.44138e-05	0.0424429	0.00112485
Jilin-140	0.282931	1.46378e-05	0.000734268	3.04264e-05	0.031141	0.00141776
LA-MC-ICP-MS CUG-Session 2
	176Hf/177Hf	2σ	176Lu/177Hf	2σ	176Yb/177Hf	2σ
Jilin-01	0.282965	1.45722e-05	0.0010972	6.94775e-06	0.044438	0.000285661
Jilin-02	0.282929	1.24962e-05	0.000679141	4.22921e-05	0.0276508	0.00171719
Jilin-03	0.28294	1.55366e-05	0.00115132	3.79986e-05	0.0471845	0.00152975
Jilin-04	0.282924	1.40048e-05	0.000572413	2.36427e-05	0.0232149	0.000972329
Jilin-05	0.282932	1.27636e-05	0.000624321	1.87268e-05	0.0249633	0.00080462
Jilin-06	0.282915	1.27491e-05	0.000596326	1.6898e-05	0.023854	0.000646873
Jilin-07	0.282924	1.51152e-05	0.000784786	1.8978e-05	0.0313186	0.000860982
Jilin-08	0.282933	1.52164e-05	0.000492727	1.0483e-05	0.0193967	0.000408426
Jilin-09	0.282931	1.63598e-05	0.000893902	3.26835e-05	0.0357638	0.00127676
Jilin-10	0.282907	1.21649e-05	0.000287152	4.61785e-07	0.0107502	4.04295e-05
Jilin-11	0.282917	1.2908e-05	0.000443011	3.95207e-06	0.0167775	0.000205457
Jilin-12	0.282902	1.36147e-05	0.000575151	2.93088e-06	0.0217233	0.000103137
Jilin-13	0.282917	1.38318e-05	0.00061867	6.2372e-06	0.0232999	0.000185201
Jilin-14	0.282924	1.11743e-05	0.000694967	9.30216e-06	0.0258597	0.000348088
Jilin-15	0.282913	1.03211e-05	0.000476246	3.75901e-06	0.018267	0.000214141
Jilin-16	0.282921	1.22618e-05	0.000559062	5.90284e-06	0.0213668	0.000143974
Jilin-17	0.282911	1.05327e-05	0.000883086	9.56387e-07	0.0345817	0.000207485
Jilin-18	0.282927	1.40127e-05	0.00116318	2.46019e-05	0.044618	0.000942456
Jilin-19	0.282931	1.40874e-05	0.000981762	2.25532e-05	0.0373497	0.000905424
Jilin-20	0.28293	1.31801e-05	0.000926636	2.34431e-05	0.0360068	0.000873526
Jilin-21	0.28292	1.31473e-05	0.000818354	6.87909e-06	0.0322026	0.000248004
Jilin-22	0.282921	1.28319e-05	0.000459323	8.879e-06	0.0175219	0.000405696
Jilin-23	0.282929	1.35695e-05	0.000370751	2.49213e-06	0.013965	0.000107474
Jilin-24	0.282909	1.49977e-05	0.000530656	2.41905e-05	0.0202678	0.000957506
Jilin-25	0.282921	1.5434e-05	0.000594174	2.07821e-05	0.0227827	0.000773401
Jilin-26	0.282936	1.61512e-05	0.00160001	1.86652e-05	0.062758	0.000916071
Jilin-27	0.282915	1.37585e-05	0.00130639	2.08616e-05	0.0519768	0.000806871
Jilin-28	0.282921	1.54551e-05	0.00118622	2.24596e-05	0.04648	0.000855215
Jilin-29	0.282939	1.62797e-05	0.00126335	3.55201e-06	0.0500299	0.000284866
Jilin-30	0.282917	1.55397e-05	0.000604078	6.28363e-06	0.023894	0.000195194
Jilin-31	0.282916	1.77902e-05	0.000754033	4.69799e-06	0.0304403	0.000302652
Jilin-32	0.282925	1.36407e-05	0.000650886	4.25345e-06	0.0248241	0.000218468
Jilin-33	0.282918	1.42681e-05	0.000674563	5.24455e-06	0.0271726	0.000177374
Jilin-34	0.282918	1.13106e-05	0.000627577	6.44787e-06	0.0238239	0.000224779
Jilin-35	0.282919	1.28889e-05	0.0009912	2.40664e-05	0.0387928	0.000876374
Jilin-36	0.282942	1.41725e-05	0.00120349	2.66273e-05	0.0478978	0.00112971
Jilin-37	0.282926	1.25204e-05	0.000717416	3.371e-05	0.0284414	0.001398
Jilin-38	0.282905	1.27187e-05	0.000486531	7.2204e-06	0.0189506	0.00032992
Jilin-39	0.282923	1.34019e-05	0.000546223	7.24462e-06	0.0216904	0.000331686
Jilin-40	0.282915	1.43567e-05	0.000841326	8.36239e-06	0.0340287	0.000259667
Jilin-41	0.282939	1.53894e-05	0.000944264	7.63318e-06	0.0379944	0.000362095
Jilin-42	0.28292	1.34185e-05	0.000520696	2.39095e-06	0.0206996	0.000166782
Jilin-43	0.282907	1.53533e-05	0.000533204	1.5774e-06	0.021391	0.000132309
Jilin-44	0.282928	1.39503e-05	0.000533189	6.90499e-06	0.0211136	0.000319193
Jilin-45	0.282918	1.43448e-05	0.000642609	4.12601e-05	0.0256939	0.00159832
Jilin-46	0.282924	1.65033e-05	0.00107839	5.74205e-06	0.0438951	0.000364191
Jilin-47	0.28294	1.57514e-05	0.00117925	5.17906e-05	0.0469104	0.00201953
Jilin-48	0.28291	1.14688e-05	0.000935961	3.10879e-05	0.0370469	0.00113153
Jilin-49	0.282941	1.58605e-05	0.00184808	7.36762e-05	0.0776638	0.00337972
Jilin-50	0.282933	1.31524e-05	0.00179628	6.98173e-05	0.0743344	0.00291159
Jilin-51	0.282945	1.59505e-05	0.0018647	7.1884e-05	0.0772865	0.0030844
Jilin-52	0.282933	1.43437e-05	0.00116234	1.78208e-05	0.0453659	0.000575075
Jilin-53	0.282924	1.31156e-05	0.000500589	2.39929e-05	0.0187991	0.000873153
Jilin-54	0.282907	1.46279e-05	0.000915605	7.86446e-06	0.0354485	0.000217313
Jilin-55	0.282918	9.94986e-06	0.000792175	1.0355e-05	0.029941	0.000401872
Jilin-56	0.282926	1.09937e-05	0.000351854	2.65271e-06	0.0126157	0.000116971
Jilin-57	0.282934	1.0708e-05	0.000551865	2.1606e-05	0.0210114	0.000841254
Jilin-58	0.282914	1.22044e-05	0.000469337	9.67903e-06	0.0177167	0.000432916
Jilin-59	0.282924	1.26404e-05	0.000481501	3.44697e-06	0.017922	0.000163578
Jilin-60	0.282925	1.25625e-05	0.000868754	1.83209e-06	0.0328746	0.000170086
Jilin-61	0.282929	1.27666e-05	0.000884062	1.66347e-06	0.0334705	0.000125432
Jilin-62	0.282912	1.34417e-05	0.000819061	4.59905e-06	0.0311909	0.000221159
Jilin-63	0.282927	1.37402e-05	0.000782431	1.33132e-05	0.0298007	0.000530551
Jilin-64	0.282922	1.21773e-05	0.000695886	1.13751e-05	0.0264207	0.000488838
Jilin-65	0.282927	1.06573e-05	0.000609153	1.57479e-05	0.0229443	0.000670333
Jilin-66	0.282919	1.31805e-05	0.000260494	3.81671e-06	0.00913538	0.000116202
Jilin-67	0.282905	1.32288e-05	0.000505165	2.10355e-05	0.0190742	0.00085021
Jilin-68	0.282921	1.45989e-05	0.000490975	1.72826e-05	0.0182676	0.000662198
Jilin-69	0.282908	1.18512e-05	0.000382233	4.91389e-06	0.0140951	0.000207457
Jilin-70	0.282929	1.08152e-05	0.000325688	1.40215e-06	0.0121222	0.000100487
Jilin-71	0.282914	1.22003e-05	0.000684194	7.49247e-06	0.0267052	0.000367175
Jilin-72	0.28291	2.54846e-05	0.000677015	3.4332e-06	0.0265812	0.000139113
Jilin-73	0.282904	2.57584e-05	0.000232948	6.08073e-06	0.00823203	0.000271347
Jilin-74	0.282901	2.59353e-05	0.000961132	3.43713e-05	0.0364215	0.00128317
Jilin-75	0.282933	2.51102e-05	0.000468361	1.76914e-06	0.0173054	0.000102782
Jilin-76	0.282934	2.61901e-05	0.00090705	2.48785e-05	0.0346341	0.000908387
Jilin-77	0.282924	2.5077e-05	0.000438331	1.37288e-05	0.0163303	0.000506788
Jilin-78	0.28294	2.64234e-05	0.000674488	9.12604e-06	0.0259967	0.000374814
Jilin-79	0.282937	2.53095e-05	0.000722348	1.16756e-05	0.0271804	0.000441096
Jilin-80	0.282954	2.57691e-05	0.00081693	2.60066e-05	0.0308961	0.000976753
Jilin-81	0.282937	2.5263e-05	0.000795214	8.79327e-06	0.0304166	0.000267927
Jilin-82	0.282937	2.58804e-05	0.000819375	2.07973e-05	0.0310504	0.000731171
Jilin-83	0.28292	2.55269e-05	0.00064418	1.05066e-05	0.0246656	0.000395984
Jilin-84	0.282941	2.59575e-05	0.00124643	7.19622e-05	0.047301	0.00262478
Jilin-85	0.282941	2.67211e-05	0.00121614	0.000114304	0.0465085	0.00428161
Jilin-86	0.282933	2.58389e-05	0.000613137	2.17569e-05	0.0230075	0.000785389
Jilin-87	0.282941	2.50598e-05	0.000461816	2.65913e-06	0.0175411	0.000101382
Jilin-88	0.282943	2.57597e-05	0.00198529	5.44328e-05	0.0769741	0.00207817
Jilin-89	0.282933	2.54478e-05	0.000709856	4.45435e-06	0.0267357	0.000212238
Jilin-90	0.282917	2.61025e-05	0.000490865	1.1901e-05	0.0180366	0.000421955
Jilin-91	0.282914	2.52234e-05	0.000438844	8.87946e-07	0.0163494	8.54706e-05
Jilin-92	0.282932	1.54056e-05	0.000833609	2.14577e-06	0.0321879	0.000151393
Jilin-93	0.282903	1.49351e-05	0.000547611	1.52038e-05	0.0207284	0.000547018
Jilin-94	0.282913	1.78627e-05	0.000686021	6.15244e-06	0.0264376	0.000185539
Jilin-95	0.282911	1.4738e-05	0.000323188	1.35339e-05	0.0117785	0.000518764
Jilin-96	0.282903	1.51276e-05	0.000873786	5.13662e-06	0.0338275	0.000252972
Jilin-97	0.282911	1.44099e-05	0.000987737	5.22348e-06	0.0380094	0.000333688
Jilin-98	0.28291	1.65411e-05	0.000755808	2.01871e-05	0.0290113	0.000911315
Jilin-99	0.282925	1.61187e-05	0.000897103	2.3299e-05	0.0344977	0.000820692
Jilin-100	0.282916	1.55855e-05	0.000627652	4.24611e-05	0.0237627	0.00165752
Jilin-101	0.282912	1.70144e-05	0.000850816	2.37531e-06	0.0323924	9.00589e-05
Jilin-102	0.282894	1.68812e-05	0.000904646	1.18264e-06	0.034488	0.000158073
Jilin-103	0.282909	1.2665e-05	0.000844364	5.31828e-06	0.0323924	0.000127714
Jilin-104	0.282917	1.28197e-05	0.000830772	6.73799e-06	0.0318104	0.000139362
Jilin-105	0.282924	1.56081e-05	0.000644094	7.98368e-06	0.0239181	0.000255779
Jilin-106	0.282916	1.36061e-05	0.000479851	2.70049e-06	0.0179957	6.78489e-05
Jilin-107	0.282921	9.42666e-06	0.000797287	1.57896e-05	0.031019	0.000798838
Jilin-108	0.282915	1.26428e-05	0.000995192	8.8366e-06	0.038615	0.000296351
Jilin-109	0.282926	1.1019e-05	0.000885302	1.57371e-05	0.0341739	0.000598251
Jilin-110	0.282933	1.28877e-05	0.000949127	2.58962e-06	0.0361791	9.30485e-05
Jilin-111	0.282915	1.07539e-05	0.000467544	2.65285e-06	0.017047	9.03572e-05
Jilin-112	0.282921	1.47071e-05	0.000412368	4.77368e-06	0.0151663	0.000187126
Jilin-113	0.282922	1.46694e-05	0.000753534	1.81749e-05	0.0277311	0.000622022
Jilin-114	0.28294	1.35132e-05	0.00107479	1.69875e-05	0.0412184	0.000647874
Jilin-115	0.282938	1.42931e-05	0.00088308	9.44443e-06	0.0338076	0.000386693
Jilin-116	0.28291	1.27361e-05	0.000830268	5.82296e-05	0.0315467	0.00215886
Jilin-117	0.28292	1.67596e-05	0.000390667	8.20744e-07	0.0139039	7.8288e-05
Jilin-118	0.282914	1.58926e-05	0.000408236	2.62297e-06	0.0146287	0.000139636
Jilin-119	0.282908	1.38278e-05	0.000435497	3.66592e-06	0.0164141	0.00019071
Jilin-120	0.282914	1.40565e-05	0.000479646	1.83578e-06	0.0182818	0.000148617
Plešovice-01	0.282464	6.4309e-06	0.000133734	2.04219e-06	0.00723798	0.0001113
Plešovice-02	0.282481	1.28955e-05	0.000183051	3.20939e-06	0.00990222	0.00016535
Plešovice-03	0.282478	1.1012e-05	0.000217738	6.0822e-07	0.0117796	2.76135e-05
Plešovice-04	0.282481	1.47228e-05	0.000241654	5.018e-06	0.0134926	0.000296626
Plešovice-05	0.282472	1.52855e-05	7.53138e-05	8.11787e-07	0.0041284	3.23388e-05
Plešovice-06	0.282469	1.17073e-05	6.86509e-05	1.48799e-06	0.00377613	8.63109e-05
Plešovice-07	0.282462	1.04295e-05	0.000109975	4.96052e-06	0.00592562	0.00023909
Plešovice-08	0.282475	1.128e-05	0.000150231	1.65716e-06	0.00810032	9.87342e-05
Plešovice-09	0.282478	1.02887e-05	0.000187384	5.51774e-06	0.0101011	0.000303158
Plešovice-10	0.282477	9.67549e-06	0.000136876	5.04512e-07	0.00713796	3.70242e-05
Plešovice-11	0.282482	1.11768e-05	0.000136967	5.6402e-07	0.00731599	5.43304e-05
Plešovice-12	0.28247	1.21804e-05	0.000152763	7.04002e-07	0.00820448	4.30655e-05
Plešovice-13	0.282482	1.25992e-05	0.00013184	2.42756e-06	0.00706155	0.000166956
Plešovice-14	0.282475	1.21805e-05	0.000221402	1.45034e-06	0.0119181	8.699e-05
Plešovice-15	0.282482	1.77645e-05	0.000182686	7.08025e-07	0.00985465	3.40374e-05
Plešovice-16	0.282481	1.47841e-05	0.000209515	2.34957e-06	0.0104611	8.86328e-05
Plešovice-17	0.282477	1.30828e-05	0.00019528	1.20381e-06	0.00970924	8.2242e-05
Plešovice-18	0.282473	1.09579e-05	0.000130138	3.94796e-06	0.00653049	0.000215585
Plešovice-19	0.282474	1.12427e-05	8.77486e-05	2.16003e-07	0.00428892	1.61101e-05
Plešovice-20	0.282481	1.0617e-05	8.06062e-05	1.6311e-06	0.00402216	9.11552e-05
Plešovice-21	0.282461	2.49423e-05	8.41034e-05	1.46806e-06	0.00413994	9.68682e-05
Plešovice-22	0.282487	2.51793e-05	8.20509e-05	1.19248e-06	0.00405245	7.10693e-05
Plešovice-23	0.282471	1.4864e-05	0.000103707	2.60959e-06	0.00516206	0.000127595
Plešovice-24	0.282478	9.81808e-06	0.000102153	1.72644e-06	0.00511558	8.4903e-05
Plešovice-25	0.282474	1.43132e-05	9.74371e-05	9.22299e-07	0.00489942	5.03251e-05
Plešovice-26	0.282487	9.32167e-06	0.000114602	9.71679e-07	0.00570965	4.51062e-05
Plešovice-27	0.282477	1.33616e-05	0.000129125	1.03597e-06	0.00647869	6.37937e-05
Plešovice-28	0.282476	2.13802e-05	7.04585e-05	9.69187e-07	0.00334935	4.60222e-05
Plešovice-29	0.282477	2.10775e-05	7.80203e-05	8.6156e-07	0.00381885	4.5126e-05
LA-MC-ICP-MS WHSSATC
	176Hf/177Hf	2σ	176Lu/177Hf	2σ	176Yb/177Hf	2σ
Jilin-01	0.282907	1.74293e-05	0.000633619	4.2105e-05	0.0197398	0.00102432
Jilin-02	0.282928	1.59334e-05	0.00103411	7.53404e-05	0.0323829	0.00307141
Jilin-03	0.282931	1.63931e-05	0.00064324	3.38838e-05	0.0202497	0.00104559
Jilin-04	0.282916	1.53567e-05	0.00138616	4.4795e-05	0.0424782	0.00212711
Jilin-05	0.282917	1.61372e-05	0.00107447	0.000119721	0.0327337	0.00300183
Jilin-06	0.28292	1.65471e-05	0.00122364	8.70249e-06	0.0383665	0.00117782
Jilin-07	0.282932	1.54523e-05	0.000638689	7.0591e-05	0.0200338	0.00184153
Jilin-08	0.282904	1.55038e-05	0.000690008	1.93448e-05	0.021598	0.00112133
Jilin-09	0.282923	1.425e-05	0.000623778	1.61e-05	0.0197471	0.000692653
Jilin-10	0.282925	1.62736e-05	0.000514067	4.05313e-05	0.0162775	0.00162227
Jilin-11	0.282945	1.73982e-05	0.000454765	1.19733e-05	0.0158187	0.000541138
Jilin-12	0.282919	1.61135e-05	0.00165857	2.05158e-06	0.051793	0.00127648
Jilin-13	0.282909	1.56767e-05	0.00163965	3.02746e-05	0.0493865	0.000421018
Jilin-14	0.282921	1.68789e-05	0.00117328	0.000136012	0.0371534	0.00348889
Jilin-15	0.282908	1.65156e-05	0.000724862	1.67436e-05	0.023596	0.00022072
Jilin-16	0.28292	1.71115e-05	0.00116546	0.000166432	0.0348777	0.00410888
Jilin-17	0.282905	1.65048e-05	0.00160391	1.26581e-05	0.0507461	0.00110466
Jilin-18	0.282927	1.57397e-05	0.000386341	2.48373e-05	0.0118795	0.000458174
Jilin-19	0.28293	1.74497e-05	0.00136997	3.15658e-06	0.0424304	0.00101453
Jilin-20	0.2829	1.74854e-05	0.000963041	1.08072e-05	0.0302253	0.00092809
Jilin-21	0.282909	1.77735e-05	0.00141344	0.00012675	0.0456351	0.00478211
Jilin-22	0.282926	1.74211e-05	0.000499557	3.19523e-05	0.0158719	0.00125498
Jilin-23	0.2829	1.68967e-05	0.00180207	2.01611e-05	0.0578096	0.000898801
Jilin-24	0.282927	1.65942e-05	0.000630223	1.04796e-06	0.019416	0.000550569
Jilin-25	0.282935	1.65084e-05	0.000381462	2.79301e-05	0.0115833	0.00118293
Jilin-26	0.282919	1.71564e-05	0.000702142	4.25644e-05	0.0219856	0.000842476
Jilin-27	0.282932	1.92634e-05	0.000831807	4.71244e-05	0.0266467	0.00184536
Jilin-28	0.282922	1.4777e-05	0.000774911	4.48818e-06	0.0252672	0.000577686
Jilin-29	0.282935	1.68762e-05	0.000916837	0.000192758	0.0283418	0.00545254
Jilin-30	0.282925	1.64116e-05	0.000478916	1.25446e-05	0.0150694	0.000149384
Jilin-31	0.282921	1.62753e-05	0.000768987	4.02999e-05	0.0252569	0.00209177
Jilin-32	0.282892	1.54186e-05	0.00144392	8.97912e-05	0.0459477	0.0021936
Jilin-33	0.28295	1.7814e-05	0.000455068	1.51923e-05	0.0140295	0.000588638
Jilin-34	0.2829	1.72469e-05	0.00108575	0.000113958	0.0351856	0.00424934
Jilin-35	0.282938	1.52907e-05	0.000343884	1.29844e-05	0.0104663	0.000732605
Jilin-36	0.282913	1.52479e-05	0.000789856	1.81813e-06	0.0250535	0.000692956
Jilin-37	0.28293	1.52766e-05	0.000402312	1.41296e-05	0.0124098	0.000232599
Jilin-38	0.282943	1.57526e-05	0.000587829	6.87367e-06	0.0179013	0.000634747
Jilin-39	0.282918	1.50169e-05	0.000423145	1.78902e-06	0.0125713	0.0002987
Jilin-40	0.282912	1.62461e-05	0.000754193	1.7914e-06	0.023198	0.000672103
Jilin-41	0.282927	1.60652e-05	0.000603157	3.89693e-05	0.018995	0.000920413
Jilin-42	0.282906	1.5096e-05	0.00103185	1.47356e-05	0.0317241	0.00055638
Jilin-43	0.282918	1.63758e-05	0.00091243	5.27825e-05	0.0287287	0.00106204
Jilin-44	0.282892	1.56451e-05	0.00130305	8.8932e-05	0.040767	0.00199218
Jilin-45	0.28291	1.54464e-05	0.00166905	1.58342e-06	0.0522614	0.0013039
Jilin-46	0.282912	1.50052e-05	0.000793285	1.04089e-05	0.0251977	0.000745372
Jilin-47	0.282888	1.35952e-05	0.000745328	4.59055e-05	0.0224312	0.0010139
Jilin-48	0.282896	1.47636e-05	0.00103019	1.21601e-05	0.0322484	0.000441549
Jilin-49	0.282913	1.60034e-05	0.00112253	2.25991e-05	0.0353871	0.00161557
Jilin-50	0.282918	1.55177e-05	0.000683199	3.13954e-05	0.0206407	0.00143341
Jilin-51	0.282918	1.50762e-05	0.000781297	8.27233e-05	0.0240718	0.00212688
Jilin-52	0.282954	1.65036e-05	0.000351125	2.49234e-05	0.0107852	0.00119907
Jilin-53	0.282932	1.53959e-05	0.000621355	8.74285e-05	0.0191242	0.00253955
Jilin-54	0.282915	1.68691e-05	0.000733982	4.03606e-05	0.0230447	0.00163313
Jilin-55	0.282933	1.58135e-05	0.000458421	3.3897e-05	0.0138714	0.00154318
Jilin-56	0.282905	1.49049e-05	0.000863484	3.98019e-05	0.0271835	0.00194451
Jilin-57	0.282928	1.4281e-05	0.000482685	4.23503e-06	0.0145517	0.000306324
Jilin-58	0.282915	1.48915e-05	0.000658044	4.5228e-05	0.0207984	0.00207442
Jilin-59	0.282916	1.62312e-05	0.000755671	1.94441e-05	0.0236414	9.88086e-05
Jilin-60	0.282905	1.77301e-05	0.00113946	3.70465e-05	0.0356435	0.00112493
Jilin-61	0.282893	1.62726e-05	0.00137346	7.52766e-06	0.0428426	0.00104219
Jilin-62	0.28291	1.58234e-05	0.000482553	1.68517e-06	0.014676	0.000373586
Jilin-63	0.282928	1.59172e-05	0.000772637	7.1473e-06	0.024268	0.000687362
Jilin-64	0.282902	1.64764e-05	0.00147886	5.38662e-05	0.0464015	0.0026792
Jilin-65	0.282909	1.62676e-05	0.000652167	6.49216e-05	0.0203222	0.00260832
Jilin-66	0.282902	1.39373e-05	0.000870536	1.15178e-05	0.0268937	0.000978745
Jilin-67	0.282926	1.40735e-05	0.000418772	9.58453e-06	0.0125303	0.000380366
Jilin-68	0.282913	1.61325e-05	0.00100351	1.5703e-05	0.0312256	0.00130037
Jilin-69	0.282905	1.40603e-05	0.00104998	5.06851e-05	0.03249	0.00129311
Jilin-70	0.282915	1.74399e-05	0.00126832	3.27927e-05	0.040166	0.00135978
Jilin-71	0.282887	1.81089e-05	0.0011562	7.27342e-05	0.0367941	0.00303837
Jilin-72	0.282907	1.50558e-05	0.000837211	4.57319e-06	0.0259953	0.000710935
Jilin-73	0.282932	1.63704e-05	0.00027774	2.93417e-06	0.00803279	0.000300279
Jilin-74	0.282911	1.44432e-05	0.00106664	9.73393e-05	0.0333023	0.00329414
Jilin-75	0.282917	1.51228e-05	0.000442678	6.15288e-06	0.0133885	0.000220548
Jilin-76	0.282915	1.52382e-05	0.000701449	4.41164e-05	0.0212655	0.00192962
Jilin-77	0.282918	1.52912e-05	0.000450289	5.1264e-06	0.0137197	0.000214392
Jilin-78	0.282916	1.59991e-05	0.000780342	1.21035e-05	0.0244449	0.00100308
Jilin-79	0.282924	1.64349e-05	0.000697077	7.59823e-06	0.0218859	0.00040214
Jilin-80	0.282907	1.62615e-05	0.000768005	4.98936e-05	0.023109	0.00107397
Jilin-81	0.282903	1.69522e-05	0.000833116	3.26757e-05	0.0261991	0.000428389
Jilin-82	0.282902	1.58711e-05	0.000693889	1.68288e-05	0.0217988	0.00104151
Jilin-83	0.282917	1.51735e-05	0.00127979	0.000113086	0.039203	0.0029816
Jilin-84	0.282905	1.53997e-05	0.00087638	1.37268e-05	0.0270582	0.000461215
Jilin-85	0.282892	1.49414e-05	0.000860275	1.05514e-05	0.0264735	0.000706598
Jilin-86	0.282925	1.63024e-05	0.000805	3.688e-05	0.0251096	0.00178371
Jilin-87	0.282882	1.59028e-05	0.0017301	0.000114487	0.0539292	0.00275171
Jilin-88	0.282913	1.54032e-05	0.000718583	1.6648e-05	0.0221891	0.00100463
Jilin-89	0.282936	1.63758e-05	0.000458681	3.62534e-05	0.013828	0.000937152
Jilin-90	0.282905	1.69969e-05	0.0010496	1.1432e-05	0.0329304	0.0012604
Jilin-91	0.28292	1.48672e-05	0.000467948	1.0287e-05	0.0140342	0.000315059
Jilin-92	0.282904	1.6221e-05	0.000776145	1.27549e-05	0.024316	0.000361242
Jilin-93	0.282889	1.682e-05	0.00155663	3.55899e-05	0.0484967	0.00223624
Jilin-94	0.282869	1.45843e-05	0.00137823	6.02419e-05	0.0403136	0.00233449
Jilin-95	0.282917	1.54354e-05	0.000873938	4.18084e-05	0.0262874	0.000970841
Jilin-96	0.282948	1.43481e-05	0.000361643	2.30983e-05	0.0105298	0.000565279
Jilin-97	0.282913	1.86524e-05	0.00089222	9.93467e-05	0.0268011	0.0026386
Jilin-98	0.282918	1.78326e-05	0.000478542	1.9467e-05	0.0143427	0.000718365
Jilin-99	0.282915	1.48623e-05	0.000447438	6.57557e-05	0.0133215	0.00188487
Jilin-100	0.282925	1.62138e-05	0.000456897	4.63578e-05	0.0138505	0.0013112
GJ-1-01	0.282045	1.87725e-05	0.000258496	2.58932e-07	0.00747075	6.07291e-05
GJ-1-02	0.282035	1.57435e-05	0.00025774	3.01712e-07	0.00741454	6.59579e-05
GJ-1-03	0.282028	1.66649e-05	0.000254134	2.85617e-07	0.00733996	6.68376e-05
GJ-1-04	0.28202	1.97701e-05	0.000254082	2.8626e-07	0.00728096	6.41327e-05
GJ-1-05	0.282014	1.72872e-05	0.000254842	2.48945e-07	0.00732218	5.28867e-05
GJ-1-06	0.282022	1.73059e-05	0.00025365	2.59215e-07	0.00729348	5.51515e-05
Termora 2-01	0.282666	1.43598e-05	0.000920399	1.23749e-05	0.0266475	0.000254783
Termora 2-02	0.282683	1.62136e-05	0.000741025	8.70569e-06	0.020342	0.000598218
Termora 2-03	0.282669	1.6767e-05	0.000504382	2.02022e-06	0.0138617	0.000216674
Termora 2-04	0.282682	1.86498e-05	0.000665324	4.45469e-05	0.0193823	0.00172287
Termora 2-05	0.282654	1.69952e-05	0.00110101	3.61057e-06	0.0332292	0.000478538
Termora 2-06	0.282655	1.58279e-05	0.000941115	4.43028e-06	0.028451	0.000336341

## Sheet: Table S7
Table S7 Oxygen isotopic data of Jilin zircon.
Sample	d18O (‰)
Laser fluorination results (USTC)		2SE
Jilin-01	5.78	0.1
Jilin-02	5.89	0.1
Jilin-03	6.16	0.1
Jilin-04	6.2	0.1
Jilin-05	6.2	0.1
Jilin-06	5.98	0.1
Jilin-07	5.92	0.1
Jilin-08	6.03	0.1
Jilin-09	6.03	0.1
Average	6.05125
±2SD	0.245284
Sample	d18O (‰)	2SE
SIMS results (IGGCAS)
Zr-Jinlin@1	6.24243	0.222411
Zr-Jinlin@2	6.06537	0.225692
Zr-Jinlin@3	6.34964	0.222589
Zr-Jinlin@4	6.14167	0.22942
Zr-Jinlin@5	6.30207	0.234288
Zr-Jinlin@6	6.26682	0.229183
Zr-Jinlin@7	6.10318	0.218617
Zr-Jinlin@8	6.11679	0.233952
Zr-Jinlin@9	6.25201	0.256137
Zr-Jinlin@10	5.98145	0.223027
Zr-Jinlin@11	6.12643	0.229885
Zr-Jinlin@12	6.30542	0.24063
Zr-Jinlin@13	6.00932	0.26207
Zr-Jinlin@14	6.53248	0.237658
Zr-Jinlin@15	6.16357	0.23804
Zr-Jinlin@16	6.01333	0.213132
Zr-Jinlin@17	5.81698	0.217564
Zr-Jinlin@18	5.98413	0.237502
Zr-Jinlin@19	5.95884	0.241244
Zr-Jinlin@20	6.11304	0.216727
Zr-Jinlin@21	6.24712	0.217469
Zr-Jinlin@22	6.21772	0.214264
Zr-Jinlin@23	6.26157	0.223647
Zr-Jinlin@24	6.17598	0.24817
Zr-Jinlin@25	6.23379	0.233643
Zr-Jinlin@26	6.19847	0.23515
Zr-Jinlin@27	6.50478	0.229059
Zr-Jinlin@28	6.2946	0.211139
Zr-Jinlin@29	5.78793	0.226959
Zr-Jinlin@30	6.04672	0.213222
Zr-Jinlin@31	5.97558	0.211267
Zr-Jinlin@32	5.91189	0.233678
Zr-Jinlin@33	5.79596	0.273964
Zr-Jinlin@34	5.79069	0.229283
Zr-Jinlin@35	6.21286	0.231403
Zr-Jinlin@36	6.1708	0.224636
Zr-Jinlin@37	5.74267	0.226656
Zr-Jinlin@38	6.10047	0.224781
Zr-Jinlin@39	5.85961	0.213581
Zr-Jinlin@40	5.97633	0.211241
Zr-Jinlin@41	5.86931	0.223833
Zr-Jinlin@42	6.08933	0.207062
Zr-Jinlin@43	5.86194	0.259827
Zr-Jinlin@44	6.28704	0.223891
Zr-Jinlin@45	6.10993	0.23322
QH@1	5.66324	0.212753
QH@2	5.3014	0.217788
QH@3	5.75337	0.215603
QH@4	5.58446	0.236912
QH@5	5.62639	0.262787
QH@6	5.24912	0.269881
QH@7	5.45103	0.250109
QH@8	5.6036	0.233858
QH@9	5.57224	0.227599
QH@10	5.58571	0.234346
QH@11	5.73512	0.278639
QH@12	5.86745	0.238165
QH@13	5.47767	0.212101
QH@14	5.37276	0.264458
QH@15	5.43703	0.259562
QH@16	5.36598	0.227154
SIMS results (GIGCAS)
JIN LIN@01	6.13473	0.25813
JIN LIN@02	6.09034	0.166743
JIN LIN@03	6.28833	0.218826
JIN LIN@04	5.83999	0.26979
JIN LIN@05	6.18909	0.137159
JIN LIN@06	6.2978	0.15621
JIN LIN@07	6.26788	0.155073
JIN LIN@08	6.15966	0.187068
JIN LIN@09	6.15966	0.258684
JIN LIN@10	6.28982	0.225421
JIN LIN@11	6.06242	0.195459
JIN LIN@12	6.22549	0.170232
JIN LIN@13	6.13523	0.167201
JIN LIN@14	6.22649	0.281333
JIN LIN@15	6.25641	0.167439
JIN LIN@16	6.20604	0.222322
JIN LIN@17	6.31825	0.192665
JIN LIN@18	6.2998	0.159694
JIN LIN@19	6.41101	0.140836
JIN LIN@20	6.32872	0.268228
JIN LIN@21	6.39156	0.16947
JIN LIN@22	6.13323	0.214148
JIN LIN@23	6.17163	0.240717
JIN LIN@24	6.02302	0.235231
JIN LIN@25	6.07788	0.25423
JIN LIN@26	6.07389	0.214295
JIN LIN@27	6.07588	0.14213
JIN LIN@28	6.09932	0.16705
JIN LIN@29	6.23646	0.280494
JIN LIN@30	5.73876	0.129003
JIN LIN@31	6.01504	0.185975
JIN LIN@32	6.11079	0.180001
JIN LIN@33	6.18959	0.129783
JIN LIN@34	6.10431	0.203961
JIN LIN@35	5.95021	0.203774
JIN LIN@36	6.06641	0.172123
JIN LIN@37	6.24494	0.324055
JIN LIN@38	6.38957	0.270839
JIN LIN@39	5.88887	0.186719
JIN LIN@40	6.09782	0.186565
JIN LIN@41	6.1073	0.189426
JIN LIN@42	6.07139	0.237509
JIN LIN@43	6.20056	0.188884
JIN LIN@44	6.30977	0.287059
JIN LIN@45	6.07538	0.290218
JIN LIN@46	5.97315	0.149032
JIN LIN@47	6.21701	0.214577
JIN LIN@48	6.17313	0.152479
JIN LIN@49	5.89385	0.219143
JIN LIN@50	6.29531	0.152814
JIN LIN@51	6.40901	0.249951
JIN LIN@52	6.20854	0.253608
JIN LIN@53	6.04147	0.197041
JIN LIN@54	6.39106	0.179878
JIN LIN@55	6.33571	0.2154
JIN LIN@56	6.1821	0.19215
JIN LIN@57	6.24893	0.307487
JIN LIN@58	6.34618	0.214509
JIN LIN@59	6.31127	0.175513
JIN LIN@60	6.23846	0.213449
JIN LIN@61	6.32872	0.202261
QINGHU@01	5.23956	0.13529
QINGHU@02	5.53828	0.170424
QINGHU@03	5.07349	0.219853
QINGHU@04	5.59064	0.13292
QINGHU@05	5.40662	0.274704
QINGHU@06	5.57718	0.237909
QINGHU@07	5.46846	0.166593
QINGHU@08	5.59314	0.168996
QINGHU@09	5.71432	0.247661
QINGHU@10	5.42208	0.254562
QINGHU@11	5.54127	0.215785
QINGHU@12	5.93724	0.16187
QINGHU@13	5.66196	0.167764
QINGHU@14	5.8006	0.176889
