# Supplementary material for: Jilin zircon – a new natural reference material for microbeam U–Pb geochronology and Hf–O isotopic analysis
Source: Royal Society of Chemistry journal article supplement (doi:10.1039/d1ja00258a), 2021-01-01
Supplement: d1ja00258a2.pdf [file d1ja00258a2.pdf]

**Electronic Supplementary Information (ESI)**

**Jilin Zircon – A New Natural Reference Material  
for Microbeam U-Pb Geochronology and Hf-O  
Isotopic Analysis**

**Tao Luo,<sup>a</sup> Qiuli Li,<sup>b</sup> Xiaoxiao Ling,<sup>b</sup> Yang Li,<sup>b</sup> Chuan Yang,<sup>c</sup> Hanlin Wang,<sup>a</sup>  
Xiaoping Xia,<sup>d</sup> Shaobing Zhang,<sup>e</sup> Lei Xu,<sup>b</sup> Xiaoming Liu,<sup>f</sup> Xiaodong Deng,<sup>a</sup>  
Zhaochu Hu,<sup>\*,a</sup>**

<sup>a</sup> *State Key Laboratory of Geological Processes and Mineral Resources, China  
University of Geosciences, Wuhan, 430074, PR China (\*E-mail: [zchu@vip.sina.com](mailto:zchu@vip.sina.com))*

<sup>b</sup> *State Key Laboratory of Lithospheric Evolution, Institute of Geology and  
Geophysics, Chinese Academy of Sciences, Beijing, 100029, China*

<sup>c</sup> *NERC Isotope Geosciences Laboratory, British Geological Survey, Keyworth, NG12  
5GG, UK*

<sup>d</sup> *State Key Laboratory of Isotope Geochemistry, Guangzhou Institute of  
Geochemistry, Chinese Academy of Sciences, Guangzhou 510640, China.*

<sup>e</sup> *CAS Key Laboratory of Crust-Mantle Materials and Environments, School of Earth  
and Space Sciences, University of Science and Technology of China, Hefei, 230026,  
China*

<sup>f</sup> *Key Laboratory of Continental Dynamics, Department of Geology, Northwest  
University, Xi'an, 710069, China.*

**\* Corresponding author: [zchu@vip.sina.com](mailto:zchu@vip.sina.com)**

***Submitted to Journal of Analytical Atomic Spectrometry***

## **Table captions**

**Table S1** Summary of U-Pb, Hf and O isotope compositions of commonly used zircon reference materials.

**Table S2** Trace element results of the Jilin zircon.

**Table S3** U-Pb isotopic data of Jilin zircon obtained with CA-ID-TIMS.

**Table S4** SIMS U-Pb dating results for Jilin zircon.

**Table S5** LA-ICP-MS U-Pb dating results for Jilin zircon.

**Table S6** Hafnium isotopic composition of Jilin zircon.

**Table S7** Oxygen isotopic data of Jilin zircon.
